# Supplementary material for: Sex Differences in the Outcomes of Elderly Patients with Acute Coronary Syndrome
Source: Cardiol Res Pract. 2020 May 12;2020:5091490. doi: 10.1155/2020/5091490 (PMC7240792; doi:10.1155/2020/5091490)
Supplement: Supplementary Materials — A supplementary Excel datasheet file was used for statistical analysis. [file 5091490.f1.xlsx]

## Sheet: Recovered_Sheet1
Demographics and medical history																			Laboratory data																									In-hospital management
Patient ID	Age, yrs	Gender	BMI	SBP,mmHg	DBP, mmHg	HR, bpm	Hypertension	Diabetes mellitus	CKD≥3	COPD	Current smoking	Stroke	Previous chest pain	Previous PCI	Previous CABG	Atrial fibrillation	ACS type	Severe heart failure	WBC	Hb	PLT	N	N_A	L	L_A	MPV	Fasting glucose	HbA1C	ALT	AST	ALB	TG	CHOL	HDL	LDL	Serum uric acid, ummol/l	Creatinine	PT	APTT	CKMb	TnT	BNP	EF	Aspirin	Clopidogrel	ACEIARB	Beta blocker	Statin	Diuretic
1172318	76	1	21.26	110	62	87	0	0	0		1	0	1	0	0	0	STEMI	1	10.11	97	185	7.61	75.3	#NULL!	#NULL!	9.7	#NULL!	#NULL!	506.8	#NULL!	32.8	1.2	2.69	0.77	1.35	107.4	58.8	#NULL!	#NULL!	17.6	#NULL!	711.89	46	0	1	1	1	1	0
808192	75	1	#NULL!	152	79	56	1	0	0		1	0	0	0	0	0	UA	0	5.9	149	133	4.01	68.3	#NULL!	#NULL!	10.5	3.96	#NULL!	21.6	#NULL!	#NULL!	0.79	#NULL!	1.16	1.71	117	117	#NULL!	#NULL!	11.7	#NULL!	71	73	1	1	0	0	1	0
1130828	76	0	19.23	120	51	77	1	0	0		0	0	1	1	0	0	UA	0	3.25	107	126	2.05	63.1	#NULL!	#NULL!	10.2	4.6	#NULL!	84.4	#NULL!	33.9	1.22	3.21	1.18	1.64	130.8	63.1	#NULL!	#NULL!	10.2	#NULL!	276.38	54	1	1	0	1	1	0
960304	79	1	#NULL!	161	73	69	0	0	0		0	0	1	0	0	0	UA	1	7.49	107	154	5.08	67.8	#NULL!	#NULL!	12.7	#NULL!	#NULL!	28	#NULL!	31	0.78	4.49	1.51	2.36	146.5	77.3	#NULL!	#NULL!	10.1	#NULL!	1659	40	1	1	1	0	1	1
1197605	78	0	17.1	110	70	88	1	0	0		0	0	1	0	0	1	UA	1	4.68	111	211	3.76	80.4	#NULL!	#NULL!	10.1	#NULL!	#NULL!	4.6	#NULL!	31.8	0.78	4.57	1.37	2.62	152.9	32.3	#NULL!	#NULL!	15.6	#NULL!	722.99	63	1	1	0	1	1	0
1314259	76	1	#NULL!	120	78	81	1	1	0	0	1	0	1	0	0	0	STEMI	0	6.24	118	190	4.8	76.8	0.89	14.3	17.2	8.8	#NULL!	26.6	17.1	36	1.3	2.97	1.02	1.44	155.3	55.9	#NULL!	#NULL!	14.3	#NULL!	1147.2	59	1	0	1	1	1	1
895790	75	1	#NULL!	178	78	69	1	0	0		1	0	1	0	0	0	UA	0	4.1	127	246	3.02	73.51	#NULL!	#NULL!	9.8	#NULL!	#NULL!	15.1	#NULL!	35.3	1.05	3.6	1.21	1.77	159.6	80.1	#NULL!	#NULL!	10.9	#NULL!	290	77	1	1	1	1	1	0
885903	76	0	22.507	123	72	71	1	0	0		0	1	1	0	0	0	UA	0	4.31	111	182	2.76	64.1	#NULL!	#NULL!	9.1	#NULL!	#NULL!	8.7	#NULL!	41	0.88	3.61	1.17	1.75	163.4	61.7	#NULL!	#NULL!	12.5	#NULL!	32	59	0	1	1	1	1	0
1213750	76	0	22.6	116	60	75	1	1	0		0	0	1	0	0	0	UA	1	6.06	78	328	4.11	67.8	#NULL!	#NULL!	8.6	5.9	#NULL!	10.7	#NULL!	35.2	1.83	4.66	1.08	3.09	163.7	61.5	#NULL!	#NULL!	13.1	#NULL!	160.52	62	1	1	1	1	1	0
1091619	75	0	18.35	150	70	60	1	0	0		0	1	1	0	0	0	UA	0	5.83	98	208	3.81	65.4	#NULL!	#NULL!	11.5	#NULL!	#NULL!	14.5	#NULL!	42.5	1.33	4.68	1.54	2.75	165.2	61.1	#NULL!	#NULL!	#NULL!	#NULL!	395.99	55	1	1	1	0	1	0
931300	78	0	24.03	115	64	66	0	0	0		0	0	1	0	0	0	STEMI	0	6.8	94	290	4.01	68.7	#NULL!	#NULL!	9.5	#NULL!	#NULL!	37.7	#NULL!	32.4	1.5	#NULL!	0.67	2.8	169	78.4	#NULL!	#NULL!	5.8	#NULL!	857	54	1	1	1	1	1	0
1338972	84	0	21.93	197	70	90	1	0	0	0	0	0	1	0	0	0	UA	1	6.56	95	275	5.02	76.5	0.98	14.9	11.7	#NULL!	#NULL!	16.3	14.4	30.5	1.83	2.72	0.54	1.59	169.6	82.9	13.8	#NULL!	8.4	#NULL!	2265.36	60	1	1	1	1	1	1
1203579	75	1	#NULL!	94	56	127	0	0	0		0	0	0	0	0	1	STEMI	1	9.33	125	151	8.37	89.7	#NULL!	#NULL!	10.4	#NULL!	#NULL!	61	#NULL!	24.3	0.59	2.77	1.24	1.1	170.9	126.3	#NULL!	#NULL!	61.1	#NULL!	9991.59	#NULL!	1	1	0	0	1	1
995883	83	1	25.39	120	75	60	1	0	0		0	1	1	0	0	0	UA	0	4.9	122	128	3.28	66.9	#NULL!	#NULL!	9.7	4.3	#NULL!	14.2	#NULL!	40	1.8	3.39	0.84	1.44	176.5	115.3	#NULL!	#NULL!	6.5	#NULL!	422	52	0	1	0	1	1	0
1165504	81	1	#NULL!	49	31	76	0	0	0		0	0	0	0	0	0	STEMI	1	11.08	113	397	9.07	81.9	#NULL!	#NULL!	11.5	#NULL!	#NULL!	12.4	#NULL!	22.8	0.88	3.96	1.09	2.4	180.3	46.6	#NULL!	#NULL!	16.4	#NULL!	2805.87	#NULL!	1	1	0	1	1	0
118940	82	0	18.489	113	63	86	1	0	0		0	0	0	0	0	0	UA	0	7.22	107	154	4.54	62.9	#NULL!	#NULL!	14.2	#NULL!	#NULL!	20.3	#NULL!	33.2	0.59	3.15	1.43	1.48	181.1	58.5	#NULL!	#NULL!	10.8	#NULL!	586	64	1	1	0	1	1	0
1079998	78	0	20.44	100	70	90	1	0	0		0	0	1	1	0	0	STEMI	0	12.02	104	240	9.36	77.9	#NULL!	#NULL!	10.5	#NULL!	#NULL!	56.7	#NULL!	34.7	1.43	3.96	0.96	2.53	183.1	60	#NULL!	#NULL!	340.5	#NULL!	2689.46	41	0	1	1	1	1	1
1125712	77	1	23.31	164	73	64	1	1	0		1	0	1	0	0	0	STEMI	0	9.58	141	181	7.62	79.6	#NULL!	#NULL!	10.8	#NULL!	#NULL!	16.5	#NULL!	35.4	0.37	3.78	0.96	2.32	185	79.3	#NULL!	#NULL!	15.8	#NULL!	816.69	48	1	1	1	0	1	1
1275967	80	0	#NULL!	108	58	70	0	0	0		0	0	0	0	0	0	STEMI	1	8.22	91	205	5.58	67.9	#NULL!	#NULL!	10.2	#NULL!	#NULL!	19.9	#NULL!	29.1	1.06	4.54	1.16	3.15	188	52	#NULL!	#NULL!	20.7	#NULL!	2545.92	44	1	1	0	0	1	0
1238262	75	0	#NULL!	157	82	77	1	0	0		0	0	1	0	0	0	UA	0	3.87	114	208	2.52	65.1	#NULL!	#NULL!	9.7	#NULL!	#NULL!	17.2	#NULL!	40.2	1.07	3.85	1.7	1.78	189	167.09	#NULL!	#NULL!	23.3	#NULL!	167.09	59	1	1	1	1	1	0
1238262	75	0	21.78	155	105	72	1	0	0	0	0	0	1	0	0	0	UA	0	3.87	114	208	2.52	65.1	1.04	26.9	9.7	#NULL!	5.6	17.2	23.6	40.2	1.07	3.85	1.7	1.78	189	53.2	13.4	39.3	23.3	#NULL!	167.09	63	1	1	1	1	1	0
1286449	76	0	22.51	140	80	85	0	0	0	0	0	0	1	1	0	0	UA	1	3.21	100	136	1.93	60.2	0.096	29.9	12	5.33	#NULL!	10	17.4	33.2	1.09	4.36	0.93	2.94	189.4	63.9	12.9	39.3	8.2	#NULL!	464.8	67	1	1	1	1	1	0
1173269	79	1	27.6	116	72	79	1	0	0	0	1	1	1	0	0	0	UA	1	3.33	114	90	2.15	64.6	0.84	25.2	9.4	5.6	7	17.5	13.3	35.6	1.49	3.1	0.86	1.74	192	100.5	12.9	34.8	15.5	13.79	312.48	58	1	1	1	1	1	0
862709	75	1	20.2	109	62	77	0	0	0		#NULL!	0	1	0	1	0	UA	1	11.4	143	126	9.6	84.4	#NULL!	#NULL!	12	#NULL!	#NULL!	8.3	#NULL!	40.7	0.74	3.68	1.58	1.78	193.1	62.4	#NULL!	#NULL!	8.3	#NULL!	149.35	56	1	1	1	1	1	1
609988	75	1	26.1	130	82	74	0	1	0		0	0	1	1	0	0	NSTEMI	1	9.55	142	187	7.24	75.8	#NULL!	#NULL!	10.1	5.2	#NULL!	23.6	#NULL!	41	2.19	2.94	1.08	1.26	193.4	646.9	#NULL!	#NULL!	30.7	#NULL!	30333	#NULL!	1	1	0	1	1	0
1121639	78	0	16.01	128	54	95	0	0	0		0	0	1	0	0	0	UA	1	6.36	70	278	4.68	73.7	#NULL!	#NULL!	9.4	#NULL!	#NULL!	7.5	#NULL!	30.4	0.93	#NULL!	0.89	1.92	193.9	58.5	#NULL!	#NULL!	10.4	#NULL!	10314	33	0	1	0	1	1	1
1362359	76	1	20.55	140	77	85	1	0	0	1	1	0	0	0	0	0	NSTEMI	1	9.81	99	176	5.82	59.4	2.71	27.6	12.1	4.81	6.8	95.8	58.7	29.9	1.04	2.15	0.74	0.94	193.9	53.9	13.8	#NULL!	14.6	16.55	279	50	1	1	1	0	1	0
899375	80	1	#NULL!	122	94	116	1	0	0		0	0	1	0	0	0	NSTEMI	1	5.1	141	118	4.08	80.3	#NULL!	#NULL!	9.8	#NULL!	#NULL!	31.6	#NULL!	35.6	0.9	4.27	1.07	2.34	196.5	156.1	#NULL!	#NULL!	17	#NULL!	20048	58	1	0	0	1	1	1
1186477	75	1	24.22	140	60	75	1	1	0		0	1	1	0	0	0	UA	1	#NULL!	132	#NULL!	#NULL!	#NULL!	#NULL!	#NULL!	#NULL!	#NULL!	#NULL!	17.6	#NULL!	#NULL!	0.86	#NULL!	1.07	1.57	202.1	67.7	#NULL!	#NULL!	13	#NULL!	133.09	56	1	1	1	1	1	1
1189581	83	0	14.7	113	68	65	1	0	0	1	0	1	1	0	0	0	UA	1	4.74	122	147	3.19	67.3	0.89	18.8	10.9	4.61	5.7	22.6	22	32.9	0.67	4.39	1.8	2.14	203.2	60.1	13.5	36.3	18.6	9.18	2336.41	59	1	1	0	0	1	1
1047512	81	0	22.9	130	72	73	1	1	0		0	0	1	0	0	0	UA	0	9.75	107	207	6.02	61.8	#NULL!	#NULL!	11.3	#NULL!	#NULL!	8.3	#NULL!	39.2	2.81	5.43	1.07	2.57	207.3	93.1	#NULL!	#NULL!	11.2	#NULL!	275	55	1	0	1	1	1	0
1377779	86	0	#NULL!	73	49	74	0	0	0	3	1	0	0	0	0	0	STEMI	1	8.55	115	107	6.79	79.3	0.86	10.1	12.1	6.12	5.3	280.5	234.3	29.4	0.97	3.33	1.53	1.32	207.8	104.1	15.6	48.1	20.7	3595	11380	50	1	1	0	0	1	1
1277296	80	0	17.67	166	89	64	0	0	0		0	0	1	0	0	0	UA	0	3.71	112	269	1.8	48.5	#NULL!	#NULL!	9.7	4.4	#NULL!	9.9	#NULL!	33.5	0.9	4.39	1.14	2.85	209.4	63.1	#NULL!	#NULL!	14.8	#NULL!	523.29	61	1	1	1	1	1	0
583096	82	0	20.2	112	65	62	1	0	0		0	0	1	0	0	0	UA	0	8.25	116	213	6.1	73.9	#NULL!	#NULL!	10.8	#NULL!	#NULL!	17.7	#NULL!	31.1	0.93	4.12	1.07	2.59	209.6	51.2	#NULL!	#NULL!	8.3	#NULL!	573	54	0	1	1	0	1	1
1223233	75	0	24.45	108	70	64	1	1	0		0	0	1	0	0	0	STEMI	0	5.75	124	211	3.71	64.6	#NULL!	#NULL!	10.4	8.9	#NULL!	53.7	#NULL!	30.4	2.07	5.15	1.26	3.39	210.4	41.6	#NULL!	#NULL!	#NULL!	#NULL!	1993.24	#NULL!	1	1	0	0	1	0
1074743	75	1	27.6	171	85	60	1	1	0		0	0	0	0	0	0	NSTEMI	1	5.53	109	190	4.24	76.6	#NULL!	#NULL!	11.6	4.4	#NULL!	49.5	#NULL!	30.6	86	3.42	0.93	2.11	210.7	64.3	#NULL!	#NULL!	291.46	#NULL!	1827.45	55	1	1	1	1	1	1
1170248	81	0	14.38	136	60	69	1	0	0		0	1	1	0	0	0	UA	1	4.65	85	246	2.9	62.4	#NULL!	#NULL!	11.6	5.4	#NULL!	8.7	#NULL!	37.4	1.01	4.52	1.01	0.89	210.8	33.5	#NULL!	#NULL!	10.9	#NULL!	207	#NULL!	1	1	1	1	1	0
1161323	78	1	16.53	117	61	63	1	0	0		1	0	0	0	0	0	NSTEMI	0	6.33	107	158	3.67	58	#NULL!	#NULL!	10.7	#NULL!	#NULL!	20.6	#NULL!	35.2	1.03	4.52	1.68	2.38	211.2	73.7	#NULL!	#NULL!	15.3	#NULL!	5397	38	1	1	0	1	1	0
1153194	79	0	14.4	115	55	70	1	0	#NULL!		0	1	1	1	0	0	UA	1	5.38	99	163	4.4	81.8	#NULL!	#NULL!	12	6.4	#NULL!	12.3	#NULL!	30.6	1.02	3.64	0.84	2.37	212.3	83	#NULL!	#NULL!	14.7	#NULL!	1455.56	65	1	1	0	0	1	1
1122201	76	0	18.489	108	62	77	0	0	0		0	0	1	0	0	0	UA	0	9.45	127	139	6.58	69.7	#NULL!	#NULL!	11.2	#NULL!	#NULL!	9.8	#NULL!	34.1	0.64	2.77	1.08	1.18	213.1	50.3	#NULL!	#NULL!	13.4	#NULL!	6.92	56	1	1	1	1	1	1
1105828	75	0	24	175	83	71	1	1	0		0	0	0	1	0	0	UA	1	8.59	129	121	6.68	77.8	#NULL!	#NULL!	11.3	8.1	#NULL!	16.4	#NULL!	42.5	1.79	7.74	1.3	5.9	213.6	55.4	#NULL!	#NULL!	21.4	#NULL!	163.95	57	1	0	1	1	1	1
1345737	81	1	20.9	145	84	71	1	0	0	1	0	0	1	0	0	0	UA	1	4.85	120	147	3.47	71.6	1.03	21.2	9.6	#NULL!	6.5	9	19.9	31.5	0.65	2.41	0.93	1.1	215.3	86.7	12.5	43.2	11.7	3.94	145.9	58	0	1	0	0	0	0
1172313	81	0	21.48	102	62	88	0	0	0		0	0	1	0	0	1	STEMI	0	14.98	131	117	13.37	89.2	#NULL!	#NULL!	11.2	#NULL!	#NULL!	16.6	#NULL!	38	1.73	3.31	0.74	2.07	216	53.3	#NULL!	#NULL!	54.3	#NULL!	1340.95	35	1	1	0	1	1	1
1138439	82	0	22	162	56	66	1	0	0		0	0	1	0	0	0	UA	0	4.77	131	260	3.06	64.2	#NULL!	#NULL!	10.5	#NULL!	#NULL!	14.3	#NULL!	36.8	8.88	4.05	1.05	1.96	216.2	56.9	#NULL!	#NULL!	10.2	#NULL!	239.29	59	1	1	1	1	1	0
1217312	78	0	19.75	120	65	70	0	0	0		0	0	1	0	0	0	UA	0	3.59	88	165	2.33	64.9	#NULL!	#NULL!	12.2	#NULL!	#NULL!	14.6	#NULL!	31	0.99	3.5	1.25	1.83	217.1	54.4	#NULL!	#NULL!	13.8	#NULL!	#NULL!	59	0	1	0	1	1	0
479926	82	1	#NULL!	85	62	78	0	0	0		1	0	1	0	0	0	STEMI	1	11.5	126	116	9.26	80.3	#NULL!	#NULL!	10.4	#NULL!	#NULL!	612.8	#NULL!	37.9	0.38	3.01	1.23	1.58	217.2	154.9	#NULL!	#NULL!	14.5	#NULL!	10292	34	1	1	0	0	1	1
1176476	79	0	26.67	162	92	88	1	0	0		0	0	0	0	0	0	UA	1	8.34	116	116	6.54	78.4	#NULL!	#NULL!	10.1	#NULL!	#NULL!	31.7	#NULL!	41.8	0.69	4.15	1.06	2.65	217.6	62.5	#NULL!	#NULL!	14.7	#NULL!	1684	52	1	1	1	0	1	1
1308933	76	0	22.2	167	63	68	1	1	0	1	1	0	1	0	0	0	UA	0	5.17	94	191	2.97	57.4	1.72	33.3	9.6	5.8	#NULL!	38.9	22.7	32	1.77	3.88	0.98	2.06	218.2	65.9	13.4	43.1	13.1	#NULL!	422.45	56	1	1	1	1	1	0
1345550	77	0	15.63	133	66	86	1	1	0	0	0	0	1	1	0	0	UA	1	4.49	114	140	2.95	65.8	1.15	25.6	11.7	6.1	7.6	9.7	16.3	33.6	1.25	5.52	1.82	3.23	218.3	74.6	10.9	26.8	19.6	10.3	86.7	68	1	0	1	1	1	0
983648	75	1	25.5	120	79	90	1	1	0		#NULL!	0	1	1	0	0	UA	0	4.3	116	138	2.53	58.7	#NULL!	#NULL!	10.7	3.8	#NULL!	12.7	#NULL!	30.8	1.69	3.25	0.74	1.91	218.3	66.2	#NULL!	#NULL!	10.9	#NULL!	60	56	1	1	0	0	1	0
1249173	84	1	#NULL!	126	84	86	0	0	0		1	0	1	0	0	0	STEMI	0	8.29	140	190	6.56	79.2	#NULL!	#NULL!	10.7	5.3	#NULL!	55.5	#NULL!	33.6	1.22	5.61	0.94	4.31	218.7	56.4	#NULL!	#NULL!	412.4	#NULL!	8010	40	1	0	1	1	1	1
1089345	78	0	21.48	129	65	89	1	0	0	0	0	0	0	0	0	0	UA	1	6.43	83	223	5.11	79.4	1.01	15.7	10.6	3.88	#NULL!	19.3	21.5	20.3	0.87	2.45	1	0.98	218.8	49.2	11.6	34.4	14	8.68	716.12	57	0	1	1	1	1	0
1367585	75	0	#NULL!	118	77	91	1	1	0	0	0	0	1	0	0	0	STEMI	0	10.92	105	151	8.87	81.2	1.11	10.2	12	7.7	6.5	80.8	375.4	35	1.63	5.58	1.35	3.41	219.3	61.7	15.9	43	292.4	3247	12723	42	1	1	1	1	1	1
1037635	84	1	24.4	157	84	90	1	0	0		1	0	1	0	0	1	NSTEMI	1	5.54	135	241	4.96	89.5	#NULL!	#NULL!	12	#NULL!	#NULL!	35.5	#NULL!	30.6	0.56	2.93	0.97	1.69	220.3	85.1	#NULL!	#NULL!	#NULL!	#NULL!	10831	37	0	0	1	1	1	1
1308621	82	0	20.7	125	72	82	0	0	0	0	0	0	1	0	0	1	NSTEMI	1	3.59	101	133	2	55.7	1.08	30.1	11.4	5.34	#NULL!	9.5	14.3	32	1.41	3.31	0.99	1.92	221.4	83.8	13	44.3	8.8	#NULL!	1019	55	1	1	0	0	1	0
1052522	78	0	#NULL!	151	79	65	1	0	0		0	0	1	0	0	1	UA	1	5.57	133	212	3.62	64.9	#NULL!	#NULL!	10.9	#NULL!	#NULL!	12	#NULL!	37.3	#NULL!	#NULL!	#NULL!	#NULL!	221.6	56.7	#NULL!	#NULL!	#NULL!	#NULL!	453	53	0	0	1	0	1	0
1334035	78	1	22.1	120	71	68	1	1	0	0	0	0	1	1	0	0	UA	0	6.12	125	158	4.67	76.4	1.03	16.8	11.1	5.7	6.5	19.5	17.9	39.1	1.78	2.78	0.92	1.54	221.8	117	12.6	34.8	#NULL!	5.26	185.95	59	0	1	0	1	1	0
1031159	87	1	#NULL!	120	62	57	1	0	0		1	0	1	0	0	0	STEMI	1	6.27	113	79	4.69	74.8	#NULL!	#NULL!	15.8	#NULL!	#NULL!	674.2	#NULL!	31.6	#NULL!	#NULL!	#NULL!	#NULL!	223.7	150.9	#NULL!	#NULL!	147.3	#NULL!	16335	52	0	1	0	0	1	1
622483	77	0	25.46	157	79	73	1	1	0		0	0	1	0	0	0	UA	0	5.61	119	244	3.27	58.3	#NULL!	#NULL!	11.8	12.2	#NULL!	54.4	#NULL!	32.1	3.42	5.69	0.95	2.49	223.8	72.6	#NULL!	#NULL!	104.3	#NULL!	#NULL!	35	1	1	1	1	1	1
1042091	77	1	#NULL!	180	70	100	1	1	0		1	0	1	1	0	1	UA	1	4.36	128	304	3.49	80.11	#NULL!	#NULL!	11.8	7.9	#NULL!	18.4	#NULL!	30.7	0.65	3.11	0.73	2.08	223.8	140.8	#NULL!	#NULL!	9.4	#NULL!	5827	52	1	1	1	0	1	1
1211373	77	0	20.079	147	63	58	1	1	0		0	0	0	0	0	0	UA	0	5.65	111	192	3.42	60.5	#NULL!	#NULL!	11.9	5.65	#NULL!	7.6	#NULL!	35.4	2.14	3.6	0.96	1.86	224.4	61.3	#NULL!	#NULL!	6.9	#NULL!	114	59	1	1	0	0	1	0
1306943	78	1	22.86	148	77	83	1	1	0	0	0	0	0	0	0	0	UA	0	5.58	141	125	3.07	55	1.96	35.1	12.9	6.79	6.9	12.9	18.6	34.2	3.51	4.66	1.17	2.88	224.5	82.4	13.2	36.9	#NULL!	#NULL!	149.25	62	1	1	1	1	1	0
129242	82	1	18.34	147	67	71	1	0	0		0	0	0	0	0	0	NSTEMI	0	3.67	102	148	1.96	52.6	#NULL!	#NULL!	9.6	#NULL!	#NULL!	11.9	#NULL!	33.6	3.94	3.94	2.05	1.66	225	72.1	#NULL!	#NULL!	#NULL!	#NULL!	135	65	1	1	1	1	1	0
1152702	75	1	16.8	120	70	54	1	0	0		1	0	1	1	0	0	UA	0	7.41	125	130	5.26	71	#NULL!	#NULL!	12.6	6.3	#NULL!	38.1	#NULL!	45.5	1.28	3.59	1.58	1.79	227.9	69.3	#NULL!	#NULL!	10	#NULL!	288.35	60	1	1	1	1	1	0
1008737	77	1	23.18	180	120	76	1	1	0		1	1	1	0	0	0	UA	1	9.63	103	222	6.45	67	#NULL!	#NULL!	11.7	8.2	#NULL!	16.5	#NULL!	37.6	2.16	5.11	1.31	3.2	228	109.7	#NULL!	#NULL!	28.9	#NULL!	926.88	40	1	1	1	0	1	1
1173194	77	0	25.3	122	70	80	1	0	0		0	0	0	0	0	0	UA	0	4.96	118	165	3.42	69	#NULL!	#NULL!	10.3	#NULL!	#NULL!	#NULL!	#NULL!	36.3	1.19	5.09	1.48	3.3	229.6	64.7	#NULL!	#NULL!	8.5	#NULL!	96	57	0	0	1	1	1	0
1192320	80	0	19.649	144	74	80	1	0	0		0	0	0	0	0	0	UA	0	6.2	128	161	4.13	66.7	#NULL!	#NULL!	12.5	#NULL!	#NULL!	10.5	#NULL!	36.3	0.81	4.47	1.5	2.6	230.5	50.9	#NULL!	#NULL!	14.2	#NULL!	1114	57	1	1	0	1	1	0
1121308	76	1	23.21	178	80	76	1	1	0		0	0	1	1	0	0	UA	1	4.97	112	120	3.21	64.7	#NULL!	#NULL!	10.5	6.3	#NULL!	14.2	#NULL!	34.7	0.68	2.83	1.16	1.52	230.7	111.9	#NULL!	#NULL!	16.3	#NULL!	387.55	59	1	1	1	1	1	0
1298033	75	0	22.07	166	83	90	1	1	1	0	0	0	1	0	0	0	NSTEMI	1	7.69	78	261	4.95	64.4	2.24	29.1	9.7	4.8	6.1	22.8	47	21.3	2.45	5.26	1.24	3.24	231.1	139.7	12.4	33.5	20.5	#NULL!	1047.5	61	1	1	0	0	1	1
1252538	75	1	#NULL!	132	71	73	0	1	0		0	0	1	0	0	0	STEMI	0	9.86	143	170	7.85	79.6	#NULL!	#NULL!	10.9	14.2	#NULL!	35.3	#NULL!	36	0.59	3.74	1.11	2.41	231.8	69.1	#NULL!	#NULL!	201.2	#NULL!	9078	41	1	1	0	1	1	1
1339102	79	1	20.28	103	79	81	0	0	0	0	1	0	0	0	0	0	NSTEMI	1	4.16	96	45	2.91	69.9	0.78	18.8	11.2	3.88	#NULL!	14.1	24.8	32.1	0.69	3.75	1.08	2.39	232.9	81.5	11.2	37.6	8.8	591.5	11795	42	1	1	1	0	0	1
1299442	75	0	#NULL!	118	57	87	1	1	0	0	0	0	1	1	0	0	STEMI	0	5.94	95	131	3.85	64.8	1.48	24.9	10.63	6.4	14.1	18.1	26.6	33.1	1.11	3.26	1.09	1.8	234.2	66.1	13.4	121.5	62.4	2818	282.2	60	1	0	1	1	1	0
976439	75	0	23.9	177	88	75	1	1	0		0	0	1	0	0	0	UA	0	5	126	#NULL!	#NULL!	#NULL!	#NULL!	#NULL!	#NULL!	6.3	#NULL!	#NULL!	#NULL!	#NULL!	#NULL!	#NULL!	#NULL!	3.63	234.7	59	#NULL!	#NULL!	#NULL!	#NULL!	249	48	0	1	0	1	1	0
1059884	79	0	24.6	139	80	80	1	0	0		0	0	1	0	0	0	UA	0	6.98	111	205	4.97	71.1	#NULL!	#NULL!	9.2	#NULL!	#NULL!	15.1	#NULL!	31.1	0.88	2.66	0.91	1.52	234.9	63.4	#NULL!	#NULL!	8.2	#NULL!	674.68	68	0	1	1	1	1	0
1083084	86	0	21.17	152	86	81	0	0	0		0	0	0	0	0	0	STEMI	0	9.1	122	292	5.91	65	#NULL!	#NULL!	9.5	#NULL!	#NULL!	44.3	#NULL!	35.6	1.65	4.69	0.84	3.24	235	67.4	#NULL!	#NULL!	12.3	#NULL!	379.55	51	1	1	0	0	1	0
1367322	77	0	24.44	146	61	58	1	0	0	0	0	1	0	0	0	0	UA	0	6.56	124	277	4.55	69.4	1.55	23.6	11.5	5.74	#NULL!	6.7	11.2	32.6	1.76	3.08	1.28	1.33	235.1	58.5	10.8	20.1	15.7	13.02	281	64	1	1	1	1	1	0
984543	75	1	#NULL!	130	80	70	0	0	0		1	0	1	0	0	0	STEMI	0	6.6	144	233	2.96	44.8	#NULL!	#NULL!	11	#NULL!	#NULL!	10.7	#NULL!	41.7	#NULL!	#NULL!	#NULL!	#NULL!	235.1	64.1	#NULL!	#NULL!	85.5	#NULL!	1743	48	1	1	0	0	1	0
1342138	77	1	19.72	114	58	73	0	0	0	0	0	0	0	0	0	0	UA	0	3.82	118	137	2.78	72.7	0.84	22	12.4	4.74	#NULL!	8.1	14.5	34.9	0.71	3.09	1.38	1.45	235.5	64.8	12.3	40.3	19.6	4.02	983.77	58	1	1	1	1	1	0
1211540	78	0	#NULL!	116	59	73	0	0	0		0	0	0	0	0	0	STEMI	0	8.89	98	333	6.79	76.4	#NULL!	#NULL!	7.2	#NULL!	#NULL!	45.2	#NULL!	25.6	0.37	3.16	1.15	1.58	239	58.1	#NULL!	#NULL!	41.3	#NULL!	379.82	#NULL!	1	1	0	1	1	1
378302	81	0	25	109	62	60	1	0	0		0	1	1	0	0	0	UA	1	6	115	203	4.09	68.7	#NULL!	#NULL!	11.6	#NULL!	#NULL!	8.3	#NULL!	39	0.82	4.71	1.34	3.22	239.7	85.2	#NULL!	#NULL!	8.9	#NULL!	518	#NULL!	0	1	1	1	1	0
1137886	79	1	24.4	128	70	80	1	0	0		1	0	1	0	0	0	STEMI	0	8.46	138	159	6.31	74.7	#NULL!	#NULL!	11	#NULL!	#NULL!	15.3	#NULL!	33.4	1.1	4.21	1.18	2.55	242	104.6	#NULL!	#NULL!	34.6	#NULL!	3395	48	1	1	1	1	1	0
1360087	77	0	20.89	122	70	80	1	0	0	0	0	0	0	0	0	0	UA	1	8.31	118	333	5.67	68.2	1.92	23.1	10.8	4.69	6	21.2	21.3	37.6	1.5	4.76	1.16	3.24	243.5	59.6	13.2	38.6	9.7	47.45	1342	56	1	1	1	1	1	1
713471	84	0	28.44	112	68	74	1	0	0		0	0	1	0	0	0	UA	1	4.9	105	152	2.46	50.2	#NULL!	#NULL!	12	#NULL!	#NULL!	15.5	#NULL!	35.8	1.76	3.97	1.81	2.28	243.9	54.6	#NULL!	#NULL!	16.4	#NULL!	194	68	0	1	1	0	1	0
852072	84	0	#NULL!	118	59	76	1	0	0		#NULL!	0	1	0	0	0	UA	1	4.7	56	115	3.17	67.8	#NULL!	#NULL!	8.1	#NULL!	#NULL!	5.5	#NULL!	39.4	1.36	3.35	0.78	1.92	245	81	#NULL!	#NULL!	8.7	#NULL!	373	68	0	1	0	0	1	1
909846	75	0	17.8	115	63	73	1	1	0		#NULL!	0	1	0	0	0	UA	1	6.4	131	153	4.41	69.3	#NULL!	#NULL!	11.3	6.1	#NULL!	12	#NULL!	36.7	1.39	4.5	1.11	2.63	245.5	189	#NULL!	#NULL!	10.9	#NULL!	376	61	1	1	0	1	1	0
1050598	76	1	#NULL!	120	79	91	0	0	0		0	1	0	0	0	0	STEMI	0	8.53	123	146	6.77	79.4	#NULL!	#NULL!	11.3	#NULL!	#NULL!	52.1	#NULL!	33.2	1.1	4.66	1.25	2.86	245.5	81.5	#NULL!	#NULL!	16.7	#NULL!	2740	48	1	1	1	1	1	1
1072660	77	1	26.29	110	61	96	1	1	0	0	1	0	1	0	1	0	NSTEMI	1	9.17	105	143	7.02	76.6	1.44	15.7	11.5	9	7.9	14.1	13.8	36.6	1.26	3.55	1	2.1	246.7	117.9	13.4	42.5	19	39.74	6163.11	65	1	0	0	0	1	1
1378008	76	1	24.22	140	75	68	1	1	0	0	1	0	1	0	0	0	UA	0	4.44	144	144	1.99	44.9	1.87	42.1	12.3	6.8	#NULL!	26.7	18.9	39.4	0.8	3.05	1.13	1.44	246.9	67.8	11.4	26.4	13.4	1234	254.81	36	1	1	1	0	1	0
595029	81	0	#NULL!	205	88	77	1	1	0		0	0	1	0	0	0	NSTEMI	0	4.3	122	160	4.25	98.74	#NULL!	#NULL!	13.9	7.7	#NULL!	13.7	#NULL!	39.6	1.17	8.71	1.12	1.7	247.6	51.8	#NULL!	#NULL!	17.7	#NULL!	1426	70	1	1	1	1	#NULL!	0
1316071	81	0	23	150	93	72	1	0	0	0	0	0	1	0	0	0	UA	1	7.56	112	291	5.9	78	0.97	12.8	10.9	4.62	5.7	17.9	16.1	29.6	1.1	3.78	1.15	2.12	247.6	105.5	13	70.1	21.3	#NULL!	597.91	#NULL!	1	1	1	1	1	0
1273998	83	1	#NULL!	106	63	73	1	0	0		0	1	0	0	0	1	STEMI	1	14.7	126	160	12.82	87.3	#NULL!	#NULL!	11.2	#NULL!	#NULL!	8.1	#NULL!	30.1	0.43	3.51	1.28	1.91	248.4	95.7	#NULL!	#NULL!	15.9	#NULL!	3380.78	47	1	1	1	0	1	1
752451	75	1	24.16	124	64	51	1	1	0	1	1	0	1	1	0	1	UA	1	4.85	122	138	3.26	67.3	0.86	17.7	10.9	5.4	6.2	#NULL!	#NULL!	#NULL!	1.02	2.24	0.67	1.33	249.3	#NULL!	#NULL!	#NULL!	48.1	9.68	#NULL!	57	0	1	0	0	1	0
1089345	75	0	23.73	110	50	58	1	0	0		0	0	1	0	0	0	UA	0	11.27	97	271	9.28	82.3	#NULL!	#NULL!	10.3	#NULL!	#NULL!	11.4	#NULL!	30.5	1.56	2.68	0.95	1.29	250	57.4	#NULL!	#NULL!	7.6	#NULL!	#NULL!	66	1	1	1	0	1	0
1152970	83	1	#NULL!	153	88	110	0	0	0		0	0	0	0	0	0	STEMI	0	5.56	116	176	4.32	77.8	#NULL!	#NULL!	10.7	#NULL!	#NULL!	13.6	#NULL!	34.9	0.94	3.54	1.4	1.65	250.5	92.8	#NULL!	#NULL!	25.5	#NULL!	4288	#NULL!	1	1	1	1	1	1
1121863	76	0	23.23	120	63	87	1	0	0		0	0	1	0	0	0	UA	0	4.57	137	148	3.21	70.2	#NULL!	#NULL!	13	#NULL!	#NULL!	19.4	#NULL!	38.1	1.52	5.59	1.2	3.98	250.9	59.6	#NULL!	#NULL!	8.5	#NULL!	352	57	1	1	0	1	1	0
1136138	78	0	30.82	119	63	68	1	0	0		0	1	1	0	0	0	UA	1	11.55	107	260	7.51	65	#NULL!	#NULL!	9.4	#NULL!	#NULL!	18	#NULL!	33.4	0.69	2.86	1.2	1.31	251	56.2	#NULL!	#NULL!	10.3	#NULL!	330	54	1	1	1	1	1	0
1289074	75	0	24.1	104	70	102	0	1	0	0	0	1	0	0	0	0	NSTEMI	0	23	144	245	7.09	30.9	15.02	65.3	9.6	10.5	8.7	20.7	58.2	36.3	3.12	5.55	1.05	3.49	251.1	64.7	12.5	38.5	57.8	#NULL!	2798.21	50	1	1	0	1	1	0
941413	75	1	24.22	152	86	98	1	0	0		1	0	1	0	0	0	UA	0	6.78	147	164	4.63	68.2	#NULL!	#NULL!	10.4	#NULL!	#NULL!	27.9	#NULL!	36.1	1.28	3.47	0.91	2.1	251.2	65.1	#NULL!	#NULL!	13.8	#NULL!	9.6	65	1	1	0	1	1	0
1270626	78	0	26.1	133	85	84	1	1	0		0	0	0	1	0	0	UA	1	6.11	126	204	3.51	57.4	#NULL!	#NULL!	10.4	6.9	#NULL!	14.7	#NULL!	38.3	2.11	4.27	1.61	2.28	252.1	48.1	#NULL!	#NULL!	16.2	#NULL!	44.7	59	1	1	1	1	1	0
1272349	78	0	#NULL!	116	62	81	1	0	0		0	0	0	1	0	0	UA	1	6.81	123	209	4.31	63.3	#NULL!	#NULL!	10.2	#NULL!	#NULL!	#NULL!	#NULL!	#NULL!	0.59	#NULL!	1.44	1.6	253.5	71.4	#NULL!	#NULL!	8.9	#NULL!	812.44	65	1	1	0	1	1	0
1210419	80	0	21.4	169	80	87	1	0	0	0	0	0	1	0	0	0	UA	0	6.91	129	264	4.55	65.9	1.7	24.6	9.6	#NULL!	#NULL!	12.1	20.3	36.2	0.7	3.3	1.55	1.13	255.2	70.4	12.9	35	16.3	7.5	364.2	53	1	1	1	1	1	0
1210419	78	0	28.9	162	95	100	1	0	0		0	0	1	0	0	0	STEMI	0	7.03	127	262	4.38	62.4	#NULL!	#NULL!	10	#NULL!	#NULL!	27.5	#NULL!	33.8	0.78	4.21	1.2	2.59	255.4	255.4	#NULL!	#NULL!	61.4	#NULL!	6262	50	1	1	1	1	1	0
1062613	75	0	#NULL!	119	76	74	1	0	0		0	0	1	0	0	0	STEMI	0	8.02	110	248	7.32	91.4	#NULL!	#NULL!	10	#NULL!	#NULL!	61.3	#NULL!	35.7	0.91	5.11	1.51	2.93	255.7	15.5	#NULL!	#NULL!	295.7	#NULL!	3323	#NULL!	1	1	1	1	1	0
1243929	75	1	22.22	108	59	83	0	0	0		0	0	1	0	0	0	NSTEMI	0	4.09	109	177	2.51	61.4	#NULL!	#NULL!	9.8	#NULL!	#NULL!	5.3	#NULL!	34.3	0.95	5.82	1.57	4.8	257.8	#NULL!	#NULL!	#NULL!	28.2	#NULL!	2656.23	56	1	1	0	1	1	0
1120379	77	0	22.51	118	52	58	1	0	0		0	0	0	0	0	0	NSTEMI	0	6.38	110	293	3.66	57.3	#NULL!	#NULL!	10.3	#NULL!	#NULL!	21.6	#NULL!	33.3	2.18	4.46	1	2.89	261.8	63.5	#NULL!	#NULL!	20.3	#NULL!	2466	54	1	1	0	1	1	1
741095	80	0	#NULL!	88	61	116	1	0	0		0	1	1	1	0	0	STEMI	1	21.2	133	183	19.4	91.54	#NULL!	#NULL!	12.4	#NULL!	#NULL!	221.8	#NULL!	34.2	2.07	3.13	0.87	1.46	262.4	70.2	#NULL!	#NULL!	221.8	#NULL!	7428	30	1	1	1	1	1	1
841730	81	1	25.51	133	71	74	0	1	0		1	0	1	1	0	0	UA	1	6.59	121	121	4.85	75	#NULL!	#NULL!	10.6	4.6	#NULL!	9.7	#NULL!	35.9	0.77	2.5	0.94	1.17	263.5	67.3	#NULL!	#NULL!	17.4	#NULL!	345	56	1	1	0	1	1	0
1262186	77	0	23.6	119	78	92	1	1	0		0	0	1	0	0	1	STEMI	1	10.64	115	135	9.16	86.1	#NULL!	#NULL!	14.6	#NULL!	#NULL!	16.7	#NULL!	29.1	1.56	3.8	0.87	2.43	264.5	53.4	#NULL!	#NULL!	26.3	#NULL!	5585.9	#NULL!	1	1	0	0	1	1
1168407	84	1	21	183	93	80	1	0	0		1	1	1	0	0	0	UA	0	9.41	105	257	7.6	80.8	#NULL!	#NULL!	10.4	#NULL!	#NULL!	14.3	#NULL!	36.9	1.83	2.74	1	1.81	264.5	80.5	#NULL!	#NULL!	11.4	#NULL!	740	58	1	0	0	1	1	0
1209505	75	0	20.6	130	70	74	1	0	0		0	0	1	0	0	0	NSTEMI	0	7.99	129	117	6.19	77.5	#NULL!	#NULL!	13.1	6.13	#NULL!	18	#NULL!	36.2	1.27	5.15	1.25	3.56	264.8	54.2	#NULL!	#NULL!	18.5	#NULL!	1041.6	58	1	1	1	1	1	0
#NULL!	76	1	22.8	130	63	50	1	0	0	0	0	0	0	1	0	0	UA	0	3.4	122	115	1.57	46.7	1.11	32.6	11.6	4.8	#NULL!	15.5	22.8	34.8	0.69	3.61	1.42	2.03	265.6	58.5	1.03	41.4	9.7	11.56	121.3	57	1	0	1	0	0	0
1165666	77	0	19.5	104	64	57	1	1	0		0	0	1	0	0	0	UA	0	6.87	126	130	4.42	61.4	#NULL!	#NULL!	12.8	6.2	#NULL!	24.7	#NULL!	34.9	0.81	3.31	1.01	1.99	267.1	67.2	#NULL!	#NULL!	12.9	#NULL!	327	54	0	0	1	0	1	0
569018	78	0	#NULL!	180	70	75	1	1	0		0	0	1	0	0	0	STEMI	0	5	106	235	3.65	73.1	#NULL!	#NULL!	10.9	8.5	#NULL!	#NULL!	#NULL!	36.3	3.88	4	0.82	1.58	267.5	76	#NULL!	#NULL!	18.2	#NULL!	1444	51	1	1	1	1	1	1
1306947	78	0	22.48	134	64	70	1	0	0	0	0	0	1	0	0	0	UA	0	6.8	126	188	5.03	74	1.69	24.9	11.2	#NULL!	6.3	14.5	15.3	39.1	1.44	4.78	1.44	2.89	268.2	63.1	11.8	#NULL!	15.6	#NULL!	145.1	62	1	0	1	1	1	0
1364922	76	0	22	148	78	82	1	0	0	0	0	0	1	0	0	0	UA	0	6.09	134	179	4.25	69.7	1.37	22.5	12.1	4.8	6	17.3	12.4	36.7	1.77	4.44	1.18	2.65	270.9	62.4	13	39.4	17.8	44.11	155.83	64	1	1	1	1	1	0
865292	85	1	#NULL!	139	75	74	1	1	0		1	0	1	0	0	0	NSTEMI	0	5.86	91	217	3.41	58.2	#NULL!	#NULL!	9.7	5.6	#NULL!	8.4	#NULL!	36.3	#NULL!	5.89	#NULL!	3.4	271	95.9	#NULL!	#NULL!	41.1	#NULL!	1824.22	#NULL!	0	1	0	1	1	1
1247096	82	1	19	125	70	65	0	0	0		0	0	1	0	0	0	UA	0	8.18	131	189	5.82	71.2	#NULL!	#NULL!	9.2	#NULL!	#NULL!	19.8	#NULL!	29.9	1.4	4.99	1.18	3.41	271	59.9	#NULL!	#NULL!	15.2	#NULL!	400.48	66	1	1	0	0	1	0
1175861	82	0	24.14	140	55	65	1	0	0		0	1	1	0	0	0	UA	1	8.3	128	208	4.97	59.9	#NULL!	#NULL!	10.7	5.4	#NULL!	#NULL!	#NULL!	32	#NULL!	#NULL!	#NULL!	#NULL!	271.3	79.7	#NULL!	#NULL!	7.7	#NULL!	72	53	1	1	0	0	1	0
1068956	79	1	22.58	138	81	56	1	0	0		0	0	1	0	0	0	UA	1	5.23	137	199	3	57.3	#NULL!	#NULL!	9.9	#NULL!	#NULL!	10.5	#NULL!	37.8	0.59	2.59	0.94	1.06	271.5	58.3	#NULL!	#NULL!	5.6	#NULL!	141.63	62	1	1	1	1	1	0
1127551	75	1	23.2	150	70	78	1	1	0		0	0	1	0	0	0	UA	1	7.58	113	286	4.98	65.8	#NULL!	#NULL!	11.1	6.7	#NULL!	29.6	#NULL!	33	0.92	2.88	0.91	1.51	272.2	182.7	#NULL!	#NULL!	10.5	#NULL!	3887.75	#NULL!	1	1	1	1	1	1
1202484	80	1	16.5	100	70	113	0	0	0		1	0	0	0	0	0	STEMI	1	12.98	143	148	11.69	90.1	#NULL!	#NULL!	10.8	8.6	#NULL!	165.8	#NULL!	37.1	0.63	5.43	2.99	2.55	272.2	111.5	#NULL!	#NULL!	1466.1	#NULL!	3559	#NULL!	1	1	0	1	1	1
1359969	75	1	#NULL!	119	86	89	0	1	0	0	0	0	1	0	0	0	NSTEMI	0	7.17	117	268	5.47	76.3	1.08	15.1	11	7.1	#NULL!	23.5	52.4	29.3	1.16	2.96	0.84	1.82	272.8	55.9	14.4	51.9	117.5	3753	3589.26	41	1	0	1	1	1	1
1018714	82	0	#NULL!	129	72	73	1	0	0		0	0	1	1	0	0	UA	0	11.1	114	374	7.55	67.9	#NULL!	#NULL!	10.4	#NULL!	#NULL!	26.5	#NULL!	37.8	1.13	4.35	1.23	2.47	273	83.1	#NULL!	#NULL!	14.9	#NULL!	1375	54	1	1	1	0	1	0
1172094	76	1	18.07	140	69	67	1	0	0		1	0	1	0	0	0	UA	0	7.07	127	140	5.62	79.6	#NULL!	#NULL!	11.7	#NULL!	#NULL!	70.8	#NULL!	38.8	0.96	4.27	2.02	1.8	273.8	87.4	#NULL!	#NULL!	12.7	#NULL!	766.67	55	1	1	0	0	1	0
1169763	82	1	19.6	101	66	60	0	0	0		#NULL!	0	0	0	0	1	UA	0	6.98	116	167	5.35	76.7	#NULL!	#NULL!	8.2	#NULL!	#NULL!	9.9	#NULL!	36.7	2.26	3.2	0.96	1.14	274.9	72.8	#NULL!	#NULL!	16.6	#NULL!	117.51	65	1	1	1	0	1	0
1309515	79	0	#NULL!	117	59	64	1	0	0	0	0	0	0	0	0	0	UA	1	5.28	133	157	3.43	65	1.37	25.9	11.3	#NULL!	5.7	10.4	12.8	39.4	1.41	4.89	1.32	3.09	275.3	51.7	13	38.3	23	#NULL!	21.56	70	1	1	1	1	1	1
1014467	77	0	23.14	108	68	62	1	0	0		0	0	1	0	0	0	UA	0	5.7	117	189	3.83	67	#NULL!	#NULL!	8.1	#NULL!	#NULL!	9.3	#NULL!	37.9	1.84	3.28	0.79	1.66	275.3	92.6	#NULL!	#NULL!	6.7	#NULL!	116	71	1	1	0	1	1	0
1196501	79	1	16.6	120	70	122	0	0	0		0	0	0	0	0	0	STEMI	1	31.06	124	248	28.53	91.8	#NULL!	#NULL!	10	#NULL!	#NULL!	62	#NULL!	25.6	0.88	2.96	0.97	1.52	275.7	102.3	#NULL!	#NULL!	88	#NULL!	14155	30	1	1	1	1	1	1
1304478	77	0	22.58	116	74	68	1	1	1	0	0	1	1	0	0	0	NSTEMI	1	5.9	78	197	4.53	76.7	1.05	17.8	11.1	#NULL!	8.6	16.9	27	29.6	1.09	2.89	0.82	1.57	275.9	132.2	11.6	#NULL!	12.8	#NULL!	6532.08	38	1	0	1	1	1	1
951711	76	1	#NULL!	140	70	70	0	1	0		1	0	1	1	0	0	STEMI	0	7	90	188	4.88	70.1	#NULL!	#NULL!	13	6.8	#NULL!	18.6	#NULL!	34.5	2.36	2.77	0.65	1.36	276.6	234.3	#NULL!	#NULL!	11.6	#NULL!	2867	#NULL!	1	1	0	1	1	0
1169931	75	0	23.7	152	69	56	1	1	0		0	0	1	1	0	1	UA	1	6.29	124	188	3.03	68.2	#NULL!	#NULL!	9.2	#NULL!	#NULL!	20.2	#NULL!	38.6	1.2	3.37	1.21	1.87	277	85.5	#NULL!	#NULL!	8.8	#NULL!	858	58	1	1	1	1	0	0
1096349	80	0	23.19	91	60	73	0	0	0		0	0	0	0	0	0	STEMI	0	6.13	118	168	3.89	63.6	#NULL!	#NULL!	10.4	5.3	#NULL!	42	#NULL!	33.5	1.61	4.82	1.28	3.15	277	79	#NULL!	#NULL!	116.1	#NULL!	887.35	50	1	1	0	1	1	0
1359826	75	1	#NULL!	135	71	74	0	0	1	0	0	0	0	0	0	0	STEMI	0	7.91	68	167	7.19	90.9	0.54	6.8	9.7	#NULL!	#NULL!	18.2	49	31	0.72	2.72	1.03	1.28	277.2	134.7	14.1	31.7	87.6	504.9	1329	#NULL!	0	1	1	1	1	0
913562	72	1	#NULL!	133	71	71	1	1	0		0	0	1	0	0	0	UA	0	11.33	143	276	10.26	90.5	#NULL!	#NULL!	9.2	#NULL!	#NULL!	48	#NULL!	31.5	1.38	6.59	2.01	3.97	278	97.2	#NULL!	#NULL!	55.6	#NULL!	849.11	74	1	0	1	1	1	0
897549	80	0	20.3	149	79	92	1	1	0		#NULL!	0	1	1	0	1	UA	0	#NULL!	122	#NULL!	#NULL!	#NULL!	#NULL!	#NULL!	#NULL!	14.2	#NULL!	27.8	#NULL!	#NULL!	2.31	#NULL!	0.88	2.61	278.1	130.7	#NULL!	#NULL!	#NULL!	#NULL!	1858.86	50	1	1	0	1	1	0
1156360	83	1	24.51	118	66	66	0	0	0	0	1	0	1	0	0	1	UA	1	3.32	115	157	2.31	69.6	0.73	22	10.8	4.8	5.6	18.1	26.1	37.1	0.57	3.11	0.88	1.86	278.1	67.7	12	#NULL!	20.8	#NULL!	1633.99	58	0	1	1	0	1	1
1373793	75	1	27.89	160	83	75	1	0	0	0	1	0	0	0	0	0	UA	1	6.06	143	219	4.14	68.4	1.19	19.6	11.8	#NULL!	6.2	27.7	26	32.9	1.95	4.67	0.86	3.25	278.6	88.5	11	#NULL!	17.2	21.63	101.41	52	1	1	1	1	1	0
1326991	75	1	22.53	95	57	77	1	0	0	0	1	0	0	0	0	0	UA	0	8.11	85	307	5.89	72.7	1.43	17.6	12.4	#NULL!	#NULL!	11.4	11.8	37.9	1.14	3.62	0.96	2.02	279	205	14	41	13.1	19.17	290.02	60	1	1	0	1	1	1
647279	79	1	21.78	127	58	51	1	1	0		0	1	1	0	0	0	UA	1	6.22	130	281	4.6	74	#NULL!	#NULL!	10.3	5.6	#NULL!	11.3	#NULL!	39.5	0.9	3.18	1.15	1.6	279.2	127.6	#NULL!	#NULL!	7.1	#NULL!	136	57	1	1	1	1	1	0
1287726	77	1	#NULL!	75	52	80	1	0	0	0	1	0	0	0	0	0	STEMI	1	7.96	132	196	6.7	84.2	0.94	11.8	10	#NULL!	#NULL!	113.6	242.3	34.8	0.6	4.42	1.34	2.82	279.7	79.9	14.9	#NULL!	206.8	1280	4378.32	54	1	1	0	0	1	1
752451	77	1	23.12	133	74	68	1	1	0		1	0	1	1	0	0	UA	0	5.38	139	160	3.5	65	#NULL!	#NULL!	10.8	#NULL!	#NULL!	14.9	#NULL!	36	1.28	2.88	0.7	1.35	279.8	89.9	#NULL!	#NULL!	6.8	#NULL!	319.33	#NULL!	0	1	0	0	1	0
1063279	76	1	22.26	117	72	80	1	0	0		1	0	1	0	0	0	NSTEMI	0	16.74	90	83	14.83	88.6	#NULL!	#NULL!	9.8	5.4	#NULL!	32.8	#NULL!	35	2.65	4.13	0.88	2.36	279.9	161.4	#NULL!	#NULL!	57.7	#NULL!	4863.08	67	1	1	1	1	1	1
1117226	75	1	19.48	146	92	72	1	1	0		0	0	0	0	0	1	UA	1	3.35	125	94	1.66	49.5	#NULL!	#NULL!	12.6	#NULL!	#NULL!	8.3	#NULL!	35.5	0.46	2.71	0.97	1.4	280.1	68.4	#NULL!	#NULL!	22.5	#NULL!	4206	40	1	1	1	1	0	1
1071275	78	0	24.4	188	78	66	1	1	0		1	1	1	0	0	0	NSTEMI	1	7.36	127	208	4.78	65	#NULL!	#NULL!	11.1	9.6	#NULL!	22.9	#NULL!	38.1	1.95	3.94	1.02	2.08	280.4	101.7	#NULL!	#NULL!	8.3	#NULL!	527.89	68	1	1	1	1	1	1
1168666	81	1	18.37	106	65	86	0	0	0		0	0	1	0	0	0	STEMI	1	5.11	108	194	4.31	84.3	#NULL!	#NULL!	11.1	#NULL!	#NULL!	14.1	#NULL!	27.8	0.6	4.49	1.35	2.68	280.4	99.6	#NULL!	#NULL!	9.5	#NULL!	9436	30	1	1	0	0	1	1
954382	77	0	#NULL!	136	59	108	1	1	0		0	0	1	0	0	0	UA	1	5	107	156	3.28	66.1	#NULL!	#NULL!	8.7	12.2	#NULL!	71.3	#NULL!	40.9	0.97	#NULL!	1	2.68	280.7	119.1	#NULL!	#NULL!	12.5	#NULL!	#NULL!	65	1	1	1	1	1	0
975565	76	1	26.446	146	76	80	1	0	0		0	0	1	1	0	0	UA	0	3.4	136	132	1.86	54.5	#NULL!	#NULL!	9.8	#NULL!	#NULL!	28.1	#NULL!	41.9	1.17	3.65	1.05	2.11	280.7	86.4	#NULL!	#NULL!	8.3	#NULL!	176	67	1	1	0	1	1	0
1294213	76	1	21.2	115	78	95	0	0	0	0	0	0	0	0	0	0	STEMI	0	10.71	110	132	9.12	85.1	0.63	5.9	11.8	#NULL!	5.3	17.8	114.7	31.6	0.9	3.43	1.08	1.84	280.7	63.5	13.9	48.6	#NULL!	4758	5122	53	1	1	1	1	1	0
1365277	82	0	20.8	134	82	62	1	0	0	0	0	0	1	1	0	0	UA	1	4.52	99	144	3.56	78.8	0.67	14.8	14.6	5.1	6.4	47.7	62.2	33.8	1.08	3.03	1.01	1.56	280.8	56.3	13.8	#NULL!	21.3	8.73	4224	48	1	1	1	1	0	1
#NULL!	86	0	#NULL!	166	75	68	1	1	0		0	#NULL!	#NULL!	#NULL!	#NULL!	#NULL!	UA	0	#NULL!	99	#NULL!	#NULL!	#NULL!	#NULL!	#NULL!	#NULL!	#NULL!	#NULL!	26.9	#NULL!	#NULL!	1.19	#NULL!	1.59	2.13	281.8	81	#NULL!	#NULL!	10.3	#NULL!	3109	61	1	0	0	0	1	#NULL!
1352301	76	1	18.55	121	95	68	1	1	0	1	1	1	1	0	0	0	STEMI	1	3.54	80	235	2.9	81.9	0.5	14.1	#NULL!	5.6	6.1	67.9	71.9	28.4	1.27	2.64	0.62	1.47	281.9	77.2	10.9	#NULL!	17.8	1958	7422	62	1	1	1	0	1	1
1294710	76	1	20.21	118	49	95	1	0	0	0	1	1	0	0	0	0	STEMI	0	8.13	114	127	5.59	68.8	1.22	15	13.8	#NULL!	#NULL!	13	22.9	33.8	0.72	2.98	1.08	1.56	282	75.6	12.5	30	13.1	301.8	9625.14	51	1	1	1	1	1	1
925463	82	1	#NULL!	158	84	87	1	1	0		1	1	1	0	0	0	UA	1	8.5	119	174	5.43	63	#NULL!	#NULL!	11.5	9.3	#NULL!	29.9	#NULL!	39.3	4.79	#NULL!	0.67	1.47	282.3	93.5	#NULL!	#NULL!	10.1	#NULL!	67	68	1	1	1	0	1	0
1353488	80	0	26.35	170	88	95	1	1	0	0	0	0	1	0	0	0	UA	1	10.78	136	203	8.37	77.6	1.51	14	11.1	11.2	8.5	10.8	15.1	36.9	2.95	4.38	0.87	2.81	282.4	57	12.6	43.8	8.2	11.45	495.3	59	1	0	1	0	1	1
1204503	82	0	#NULL!	113	65	85	0	0	0		0	0	1	0	0	1	STEMI	1	4.51	101	78	3.83	84.9	#NULL!	#NULL!	12.2	#NULL!	#NULL!	187.1	#NULL!	31.8	1.41	4.24	1.58	2.14	282.6	96.1	#NULL!	#NULL!	25	#NULL!	11212	30	1	1	0	1	1	1
1171640	77	1	23.87	140	86	92	1	1	0		0	0	1	1	0	1	UA	0	5.95	127	124	4.47	75.1	#NULL!	#NULL!	10.7	8.6	#NULL!	17.2	#NULL!	38.7	0.92	2.59	1.14	1.17	282.6	68.5	#NULL!	#NULL!	15.5	#NULL!	1455.32	46	1	1	1	1	1	0
1024789	78	0	#NULL!	116	68	74	0	0	0		0	0	1	#NULL!	0	1	STEMI	1	8.3	126	272	6.28	75.6	#NULL!	#NULL!	11.3	#NULL!	#NULL!	15.4	#NULL!	36.4	1.04	2.82	0.91	1.56	283.1	83.8	#NULL!	#NULL!	63	#NULL!	5437	34	1	1	1	0	1	1
1321525	84	1	20.28	160	60	47	0	0	0	1	1	0	1	0	0	0	UA	1	5.44	113	171	2.82	51.8	1.49	27.4	10.9	5.1	#NULL!	49.2	22.3	34.4	1.32	3.65	1.07	2.16	283.1	58.5	11.4	#NULL!	12.5	#NULL!	262.45	63	0	1	0	0	1	0
1203760	81	0	17.8	140	63	82	1	0	0		0	0	1	0	0	0	NSTEMI	1	5.8	80	424	4.58	79	#NULL!	#NULL!	8.8	#NULL!	#NULL!	10.3	#NULL!	32.6	1.38	4.56	0.82	2.89	283.3	125.2	#NULL!	#NULL!	14	#NULL!	6989.77	50	1	1	1	1	1	1
1235304	77	1	20.55	117	66	77	0	0	0		1	1	1	0	0	0	UA	0	2.28	130	149	1.16	50.9	#NULL!	#NULL!	10.6	#NULL!	#NULL!	13.6	#NULL!	36.4	1.04	3.95	1.21	2.32	284.7	83.4	#NULL!	#NULL!	16.5	#NULL!	68	59	1	1	0	1	1	0
587488	82	1	#NULL!	116	71	71	1	0	0		1	0	1	0	0	0	UA	1	4.1	87	308	3.13	76.4	#NULL!	#NULL!	9.1	6.1	#NULL!	#NULL!	#NULL!	#NULL!	2.19	4.4	0.94	2.17	285.3	685.1	#NULL!	#NULL!	7.4	#NULL!	35000	46	1	1	1	1	1	0
1241532	80	1	#NULL!	86	67	79	0	0	0		0	0	0	0	0	1	STEMI	1	8.66	115	153	7.62	88	#NULL!	#NULL!	12.1	#NULL!	#NULL!	43.2	#NULL!	40.3	1.08	5.15	1.71	2.83	285.7	74.2	#NULL!	#NULL!	291.8	#NULL!	3217.5	50	1	1	0	0	1	1
958086	80	0	25.9	141	86	65	1	1	0		0	0	0	0	0	0	UA	1	4.44	118	143	2.94	66.2	#NULL!	#NULL!	10.7	6.4	#NULL!	11.6	#NULL!	39.4	0.85	3.48	0.97	1.56	286.4	64.1	#NULL!	#NULL!	5.5	#NULL!	93.19	62	1	1	0	0	1	1
649663	81	0	21.68	163	83	70	1	0	0		#NULL!	0	1	0	0	0	NSTEMI	0	6.74	103	228	4.02	59.6	#NULL!	#NULL!	10.3	#NULL!	#NULL!	15	#NULL!	39.6	2.06	4.78	1.21	2.86	286.7	89.5	#NULL!	#NULL!	9.5	#NULL!	1005.95	#NULL!	1	1	1	1	1	0
804028	77	0	25.4	140	80	44	0	0	0		0	0	1	1	1	0	UA	0	5.14	135	225	2.72	52.9	#NULL!	#NULL!	9.2	#NULL!	#NULL!	16.7	#NULL!	43.7	1.64	4.8	1.29	3.17	287.1	52.8	#NULL!	#NULL!	#NULL!	#NULL!	129	57	1	1	0	0	1	0
1187559	76	1	23.8	160	73	64	1	0	0		0	0	1	0	0	0	UA	1	4.66	140	238	2.92	62.8	#NULL!	#NULL!	9.4	#NULL!	#NULL!	#NULL!	#NULL!	#NULL!	1.21	4.63	0.79	3.49	287.2	65.6	#NULL!	#NULL!	13.4	#NULL!	459.18	56	1	1	1	1	1	0
1252608	76	0	26.89	132	82	80	1	0	0		0	0	1	0	0	0	UA	0	7.14	127	212	4.52	63.3	#NULL!	#NULL!	9	#NULL!	#NULL!	19.6	#NULL!	40.5	1.11	4.75	1.25	3.08	287.6	86.7	#NULL!	#NULL!	13.9	#NULL!	226.47	59	1	1	1	1	1	0
1331183	75	1	16.8	167	84	65	1	0	0	0	1	0	0	0	0	0	UA	0	4.42	116	112	2.55	57.6	1.24	28.1	11.9	#NULL!	#NULL!	13.9	22.3	31.3	0.69	3.3	1.04	2.12	288.6	43.1	12.8	42.9	18.5	13.97	462.1	54	1	1	1	1	1	0
1125732	77	0	#NULL!	112	57	55	0	0	0		0	0	0	0	0	0	STEMI	0	5.36	122	99	3.43	63.9	#NULL!	#NULL!	14	#NULL!	#NULL!	25.5	#NULL!	31	1.6	4.41	0.91	3.09	288.7	71.5	#NULL!	#NULL!	43	#NULL!	589.56	60	1	1	1	0	1	0
1143585	77	1	23.38	140	70	65	1	0	0		0	1	1	0	0	0	UA	1	6.43	84	109	4.71	73.1	#NULL!	#NULL!	9.9	7.6	#NULL!	19.6	#NULL!	36	1.19	3.24	1.01	1.75	288.9	257.4	#NULL!	#NULL!	12.1	#NULL!	591.76	58	0	1	0	0	1	0
1375238	77	1	21.45	146	76	91	1	1	0	0	0	0	0	0	0	0	UA	0	4.64	130	181	3.06	66	0.91	19.6	9.9	5.33	6	10.8	18.3	36.3	0.75	3.32	1.15	1.83	289.2	74.6	12	32.9	15.1	9.76	342.12	60	1	1	1	1	1	1
1138440	81	1	21.67	148	93	84	1	0	0		1	1	1	0	0	1	UA	0	7.33	146	173	4.62	63	#NULL!	#NULL!	11.5	#NULL!	#NULL!	56.2	#NULL!	37.2	0.75	3.28	0.92	2.02	289.5	96.1	#NULL!	#NULL!	13.9	#NULL!	270	60	1	1	1	0	1	0
1374336	80	0	23.78	111	58	78	1	1	0	0	0	0	1	1	0	0	UA	0	7.82	68	252	5.76	73.8	1.52	19.4	10.6	6.8	#NULL!	6.6	17.3	32	0.74	2.79	1.13	1.15	290	68.2	11.9	23.1	15.5	14.94	140.46	58	0	0	0	0	1	1
802069	76	0	#NULL!	201	99	105	1	1	0		0	0	1	0	0	0	UA	1	6.92	116	178	4.47	64.7	#NULL!	#NULL!	10.6	9.1	#NULL!	16	#NULL!	38.8	3.82	4.34	0.97	2.54	290	66.3	#NULL!	#NULL!	8	#NULL!	173	66	1	1	1	1	1	0
1375749	83	1	18	98	54	75	0	0	0	0	1	0	0	0	0	0	STEMI	0	7.73	122	230	2.75	74.3	1.18	15.3	12.4	4.36	#NULL!	17.9	24.9	29.8	1.35	3.27	0.67	2.11	290	89.3	13.3	#NULL!	20.6	4120	2566.16	#NULL!	1	1	1	1	1	1
1089477	78	0	23.12	103	58	96	1	0	0		0	0	1	0	0	0	NSTEMI	0	4.88	110	371	2.89	59.4	#NULL!	#NULL!	8.5	#NULL!	#NULL!	10.1	#NULL!	31.7	2.44	4.04	0.83	2.72	291	86.9	#NULL!	#NULL!	17.7	#NULL!	3439.41	#NULL!	1	1	1	1	1	0
154467	80	1	22.49	120	60	80	1	0	0		1	0	1	0	0	0	UA	0	6.6	137	168	3.66	55.9	#NULL!	#NULL!	10.4	#NULL!	#NULL!	14.5	#NULL!	44.4	0.78	5.91	1.5	4.22	291.1	92.3	#NULL!	#NULL!	#NULL!	#NULL!	175	68	1	1	0	1	1	0
1279677	79	0	24.14	119	74	80	0	0	0		0	0	1	0	0	0	UA	0	6.07	119	205	3.88	63.9	#NULL!	#NULL!	12.5	#NULL!	#NULL!	12.8	#NULL!	39.9	1.36	2.5	0.97	1.19	291.2	78.5	#NULL!	#NULL!	15.4	#NULL!	90.43	61	1	1	1	1	1	0
1222305	78	0	29.9	132	94	80	1	0	0		0	0	0	0	0	0	UA	1	7.72	122	180	5.31	68.9	#NULL!	#NULL!	12.2	#NULL!	#NULL!	8.7	#NULL!	40.2	1.88	5.15	1.12	3.37	291.6	54.8	#NULL!	#NULL!	14.2	#NULL!	667	65	1	0	1	1	1	0
1005979	77	0	#NULL!	142	79	78	1	0	0		0	0	1	0	0	1	UA	1	5.1	89	218	2.61	50.8	#NULL!	#NULL!	11.4	#NULL!	#NULL!	10.8	#NULL!	37.3	2.55	4.24	0.68	2.39	291.6	72.3	#NULL!	#NULL!	7.1	#NULL!	3425	68	0	1	1	1	1	1
1006966	75	1	23.18	122	74	77	1	1	0		1	1	1	0	0	0	UA	0	4.9	133	280	2.6	52.7	#NULL!	#NULL!	11	7.1	#NULL!	20.2	#NULL!	44.4	1.87	4.06	0.83	2.38	291.7	67.8	#NULL!	#NULL!	#NULL!	#NULL!	1491	46	1	1	1	1	1	0
752946	80	0	#NULL!	143	75	75	1	0	0		#NULL!	#NULL!	#NULL!	#NULL!	#NULL!	#NULL!	UA	0	#NULL!	104	#NULL!	#NULL!	#NULL!	#NULL!	#NULL!	#NULL!	#NULL!	#NULL!	34.2	#NULL!	#NULL!	1.34	#NULL!	1.79	4.16	292.8	107.9	#NULL!	#NULL!	15.8	#NULL!	808	53	1	1	1	1	1	#NULL!
1322783	76	1	20.4	116	60	90	1	1	1	0	0	0	0	0	0	0	NSTEMI	0	3.94	89	136	2.58	65.4	1	25.4	10.1	4.56	6.5	16.3	33.2	31.4	0.55	2.82	0.99	1.39	293.3	80.5	15.1	41.5	30.7	907.5	4955	58	1	1	1	1	1	1
1235321	79	1	23.26	135	74	82	1	0	0		1	0	0	1	0	0	UA	0	4.26	120	160	2.76	64.8	#NULL!	#NULL!	12.3	#NULL!	#NULL!	9.9	#NULL!	37.3	0.47	2.9	0.98	1.57	293.9	87.2	#NULL!	#NULL!	13.3	#NULL!	444.72	#NULL!	1	1	1	1	1	0
1192333	80	1	26.4	110	65	94	1	0	0		1	0	0	0	0	0	STEMI	0	7.21	116	212	5.1	70.8	#NULL!	#NULL!	10.9	#NULL!	#NULL!	16.5	#NULL!	32.3	#NULL!	4.68	#NULL!	#NULL!	294	125	#NULL!	#NULL!	26.7	#NULL!	2255.49	38	1	1	0	1	1	1
1324216	77	1	19.53	106	64	56	0	0	0	0	1	0	1	0	0	0	UA	1	6.68	115	112	4.59	68.7	1.47	22	13.3	#NULL!	#NULL!	#NULL!	#NULL!	#NULL!	1.22	4.08	1.83	1.84	294.2	54.8	11.2	35.1	15.2	6.81	992.84	60	1	1	0	1	1	0
1255191	76	0	#NULL!	140	110	103	0	0	0		0	0	0	0	0	1	STEMI	1	13.68	84	228	11.2	81.9	#NULL!	#NULL!	10	#NULL!	#NULL!	30	#NULL!	27.7	1.39	3.56	0.71	2.19	295.1	62.7	#NULL!	#NULL!	21	#NULL!	7995	26	1	1	0	0	1	1
1136060	80	1	24.92	120	68	79	1	0	0		0	0	1	0	0	0	STEMI	0	7.95	119	138	5.74	72.2	#NULL!	#NULL!	13	#NULL!	#NULL!	31.8	#NULL!	33.9	1.35	4.41	1.06	2.84	295.4	87.4	#NULL!	#NULL!	88.1	#NULL!	1420.57	#NULL!	1	1	1	1	1	1
1212289	75	0	17.3	123	78	88	1	1	0		0	0	1	0	0	0	STEMI	1	12.42	150	235	7.48	60.3	#NULL!	#NULL!	11.8	11.3	#NULL!	37.2	#NULL!	#NULL!	2.79	5.8	1.1	3.81	295.8	52.3	#NULL!	#NULL!	20.4	#NULL!	1911	44	1	1	1	1	1	1
1171811	81	0	#NULL!	120	80	94	1	1	0		0	1	1	0	0	0	STEMI	1	21.36	114	154	17.6	82.4	#NULL!	#NULL!	10.3	8.9	#NULL!	45.6	#NULL!	29.1	0.78	2.91	1.07	1.31	295.9	190.7	#NULL!	#NULL!	50.9	#NULL!	14311.6	46	1	1	0	0	1	1
1200975	77	0	17.26	136	74	75	1	1	0		0	0	0	0	0	0	UA	1	8.31	125	317	6.29	75.7	#NULL!	#NULL!	9.8	5.7	#NULL!	#NULL!	#NULL!	#NULL!	0.96	3.24	0.98	1.9	296.2	#NULL!	#NULL!	#NULL!	29.1	#NULL!	665	#NULL!	1	1	0	1	1	0
1147137	75	1	21.3	114	64	77	1	0	0		1	0	0	0	0	0	STEMI	0	8.22	131	321	5.57	67.8	#NULL!	#NULL!	#NULL!	6.3	#NULL!	27.8	#NULL!	32.6	1.01	2.39	0.86	1.24	296.9	81	#NULL!	#NULL!	15.5	#NULL!	1472.83	46	1	1	1	1	1	0
1136766	75	0	22.89	156	84	83	0	1	0		0	0	0	0	0	0	UA	1	5.17	114	201	3.28	63.4	#NULL!	#NULL!	11.6	#NULL!	#NULL!	23.3	#NULL!	34.8	1.38	3.93	1.18	2.38	297	71	#NULL!	#NULL!	10.6	#NULL!	899	57	1	1	0	1	1	0
1265470	80	0	26.23	135	73	62	0	0	0	0	0	0	1	1	0	0	UA	1	6.15	106	160	4.66	75.8	1.11	18	10	#NULL!	6.2	9.3	17.4	35.1	1.06	4.85	1.32	3.2	297.6	56	11.5	#NULL!	15.4	17.2	513.09	54	1	1	0	1	1	0
1203915	81	1	#NULL!	174	98	89	0	0	0		1	0	0	0	0	0	STEMI	0	9.22	109	346	8.08	87.7	#NULL!	#NULL!	10.6	#NULL!	#NULL!	4	#NULL!	30.1	0.57	3.91	1.74	1.82	299.3	63.7	#NULL!	#NULL!	111.1	#NULL!	326	40	1	1	1	1	1	1
1371303	76	1	17.84	144	98	74	1	0	0	1	1	0	1	0	0	0	NSTEMI	0	5.33	120	127	4.13	77.4	0.76	14.3	11.2	#NULL!	#NULL!	4	21.4	27.6	0.68	3.64	1.36	1.76	299.4	111.2	11.9	#NULL!	19.8	173.3	2917.21	56	1	1	1	0	1	1
368757	76	0	#NULL!	155	70	77	1	1	0		1	0	1	0	0	0	STEMI	0	10.2	144	202	6.74	66.3	#NULL!	#NULL!	19.8	7.3	#NULL!	38.1	#NULL!	34.2	4.49	#NULL!	0.14	4.82	299.5	70.6	#NULL!	#NULL!	68.1	#NULL!	1329	60	1	1	1	1	1	1
985848	75	1	#NULL!	142	83	62	1	0	0		0	0	1	0	0	0	UA	0	4.9	104	123	2.53	51.3	#NULL!	#NULL!	10	#NULL!	#NULL!	15.1	#NULL!	44.4	0.71	2.68	1.05	1.31	299.5	68.1	#NULL!	#NULL!	#NULL!	#NULL!	#NULL!	57	1	1	0	1	1	0
1364716	83	1	#NULL!	135	85	60	1	1	1	0	0	0	1	0	0	1	STEMI	1	5.03	98	172	3.79	75.3	0.74	14.7	10.9	#NULL!	7.9	42.8	48.3	30.2	1.77	3.03	0.66	1.59	299.7	170.4	15.2	54.1	17.3	2276	13039	59	1	1	1	1	1	1
1189634	79	1	21.48	103	70	66	0	0	0		1	0	0	0	0	0	UA	0	6.58	140	186	4.5	68.4	#NULL!	#NULL!	10.1	#NULL!	#NULL!	5.5	#NULL!	31.3	0.78	4.56	1.52	2.51	300.2	72.1	#NULL!	#NULL!	24.5	#NULL!	741	38	1	1	0	1	1	0
1170659	83	1	21.45	173	73	71	0	0	0	0	0	0	1	1	0	0	UA	0	4.37	115	169	2.92	66.8	1.04	23.8	10.3	4.58	5.8	11.6	14.5	35.5	0.87	3.09	0.79	1.92	300.3	79.1	12.7	39.8	9	6.2	1260	61	1	1	1	1	1	1
1056520	82	1	#NULL!	129	65	88	0	0	0		0	0	0	0	0	0	STEMI	1	8.75	117	143	7.36	84.1	#NULL!	#NULL!	12.5	#NULL!	#NULL!	10	#NULL!	31.1	3.71	3.18	1.21	1.72	300.4	88.7	#NULL!	#NULL!	17.8	#NULL!	#NULL!	58	0	1	0	1	1	0
950551	76	0	22.81	113	66	70	0	0	0	0	0	0	1	1	0	0	UA	1	3.83	84	90	2.33	60.9	1.15	30	11	4.02	#NULL!	69.9	45.2	31.3	0.48	2.2	1.05	0.81	300.4	116.8	11.3	31	7.8	7.18	1505.29	60	1	1	0	0	1	0
1241654	76	1	22.41	131	81	78	1	1	0		1	0	0	0	0	0	UA	1	9.56	92	167	7.83	82	#NULL!	#NULL!	10.4	#NULL!	#NULL!	25.1	#NULL!	41.2	1.7	4.03	1.27	2.4	300.7	142.8	#NULL!	#NULL!	65.28	#NULL!	65.28	59	1	1	1	0	1	0
1267759	78	1	27.04	162	72	70	1	0	0		1	0	1	1	0	0	UA	0	3.76	122	142	2.58	68.6	#NULL!	#NULL!	11.3	#NULL!	#NULL!	15.4	#NULL!	34	1.22	2.25	0.7	1.25	301	87.7	#NULL!	#NULL!	17.4	#NULL!	176.2	63	1	1	1	1	1	0
1372146	76	0	28.22	142	85	68	1	0	0	0	0	0	1	1	0	0	NSTEMI	1	6.9	125	210	4.47	64.8	0.98	14.2	11.7	5.9	6.8	79.3	69.3	34.9	0.92	3.96	1.11	2.35	301.3	66.6	13.7	40.9	21.3	987.6	2169.51	58	1	1	1	1	1	1
1366214	82	0	29.44	135	87	54	1	0	0	0	0	0	0	0	0	0	UA	1	7.97	131	243	5.36	67.6	1.89	23.7	11.2	4.5	5.5	11.9	13.3	33.7	1.06	4.14	1.34	2.4	301.5	60.5	13.8	37.4	11.9	14.85	222.59	55	1	1	1	1	1	0
1190732	77	0	#NULL!	184	99	98	1	0	0		0	0	1	0	0	0	UA	1	7.41	135	177	4.9	66.2	#NULL!	#NULL!	12	7.8	#NULL!	48.4	#NULL!	37.2	#NULL!	2.92	#NULL!	0	301.5	59.5	#NULL!	#NULL!	40.9	#NULL!	51	51	1	0	1	1	1	1
1174718	77	1	18.02	114	69	64	0	0	0		0	0	1	0	0	0	UA	0	7.16	131	213	5.51	76.9	#NULL!	#NULL!	11	#NULL!	#NULL!	9.5	#NULL!	36.2	1.17	4.42	1.45	2.65	301.6	95.2	#NULL!	#NULL!	#NULL!	#NULL!	76.45	55	1	0	0	1	1	0
1267741	75	1	#NULL!	175	94	109	1	0	0		0	0	0	0	0	0	STEMI	1	13.07	129	237	12.13	92.7	#NULL!	#NULL!	10.6	6.7	#NULL!	18.5	#NULL!	37.3	1.05	3.72	0.83	2.57	301.8	69.2	#NULL!	#NULL!	36.7	#NULL!	5437.28	23	1	1	1	1	1	1
959079	80	1	#NULL!	129	62	68	1	0	1	0	0	0	1	0	0	0	NSTEMI	0	7.38	100	131	6.05	82	0.78	10.6	11.4	4.7	7.9	6.6	27.3	30.5	1.46	3.12	0.67	1.88	301.9	702.6	14.3	#NULL!	40	#NULL!	14988.7	48	1	1	0	1	1	0
1289599	78	0	21.2	140	76	72	1	0	0	0	0	0	0	0	0	0	STEMI	0	7.1	120	200	5.56	78.4	1.06	14.9	10	#NULL!	#NULL!	19.7	56.1	34	2.61	7.07	1.14	4.69	302.6	55.9	11.5	33.5	88.4	#NULL!	5707.99	35	1	1	1	1	1	0
1350635	85	0	#NULL!	105	59	79	0	1	1	0	0	0	0	0	0	0	STEMI	1	13.13	109	331	11.51	87.6	1.16	8.8	11.6	#NULL!	#NULL!	48.7	262.5	36.5	1.99	6.05	1.4	4.09	302.7	89.8	17.7	#NULL!	262	7581	2813.9	46	1	0	1	1	1	1
1208767	80	1	24.8	149	87	72	1	1	0		1	0	0	1	0	0	UA	1	5.49	155	192	3.23	58.9	#NULL!	#NULL!	9.6	6	#NULL!	21.4	#NULL!	36.9	1.43	3.84	0.95	2.5	303.2	#NULL!	#NULL!	#NULL!	12.7	#NULL!	125.61	50	1	1	1	0	1	0
938825	83	0	31.23	183	81	98	1	1	0		0	0	0	0	0	0	UA	1	7.63	129	187	5.57	73	#NULL!	#NULL!	10.8	#NULL!	#NULL!	17.4	#NULL!	38.8	1.13	4.35	1.38	2.66	303.3	48.9	#NULL!	#NULL!	17.2	#NULL!	608.7	57	0	1	1	1	1	1
1193499	75	0	24.34	127	62	90	0	0	0		0	1	0	0	0	1	NSTEMI	0	17.02	97	195	14.54	85.4	#NULL!	#NULL!	11	#NULL!	#NULL!	26.5	#NULL!	23.3	#NULL!	#NULL!	#NULL!	#NULL!	304.1	223.9	#NULL!	#NULL!	440.4	#NULL!	#NULL!	28	0	1	0	0	1	1
1012754	80	1	#NULL!	165	97	80	1	0	0		0	1	0	0	0	0	NSTEMI	0	6.5	130	179	4.21	65	#NULL!	#NULL!	11.7	#NULL!	#NULL!	60.6	#NULL!	35.7	1.39	4.69	0.89	2.88	304.3	80.1	#NULL!	#NULL!	17.4	#NULL!	1397	70	1	1	1	1	1	0
1294210	75	0	#NULL!	121	72	64	1	1	0	0	0	1	0	0	0	0	STEMI	0	9.41	109	202	6.46	68.6	2.32	24.7	14	5.2	7.5	26.9	95.8	36	1.56	4.12	1.04	2.59	304.6	56.7	13.5	34.1	112.8	2311	1087	52	1	1	1	0	1	0
1135939	84	0	27.09	152	90	88	1	0	0	0	0	0	0	0	0	0	NSTEMI	0	12.46	124	259	8.99	72.2	2.27	18.2	8.5	#NULL!	#NULL!	28.2	108	40.4	#NULL!	#NULL!	#NULL!	#NULL!	304.7	#NULL!	11.5	#NULL!	70.8	1665	1090.68	63	1	1	1	1	1	1
1194114	77	0	21.41	130	90	89	0	1	0		0	0	0	0	0	0	STEMI	0	5.47	107	171	2.49	45.5	#NULL!	#NULL!	12.6	7.4	#NULL!	38.3	#NULL!	33.4	1.82	3.49	0.72	2.27	305.2	78.6	#NULL!	#NULL!	7.3	#NULL!	1627	56	1	1	1	1	1	0
1298210	76	1	20.89	174	79	70	1	0	0	0	1	0	1	1	0	0	UA	0	10.75	144	188	9.7	90.3	0.7	6.5	10.2	#NULL!	#NULL!	17.7	22.6	40.6	0.63	4.41	1.18	2.98	306.8	61.7	14.9	157.9	558.3	3559	493.38	51	1	1	1	1	1	1
1298210	76	1	21.6	140	78	86	1	0	0	0	1	0	1	0	0	0	STEMI	0	10.75	144	188	9.7	90.3	0.7	6.5	10.2	#NULL!	#NULL!	56.5	313.3	40.6	0.63	4.41	1.18	2.98	306.8	61.7	14.9	157.9	28.9	7661	321.5	57	1	1	0	0	1	0
1139200	76	1	21.26	150	87	80	1	0	0		1	0	0	0	0	0	UA	0	6.1	124	130	4.59	75.2	#NULL!	#NULL!	13.2	5.1	#NULL!	25.9	#NULL!	42	1.71	2.53	0.76	1.35	306.9	79.9	#NULL!	#NULL!	#NULL!	#NULL!	740.17	52	0	1	1	1	1	0
45884	78	0	23.95	113	65	67	1	0	0		0	#NULL!	#NULL!	#NULL!	#NULL!	#NULL!	UA	0	#NULL!	126	#NULL!	#NULL!	#NULL!	#NULL!	#NULL!	#NULL!	#NULL!	#NULL!	12.2	#NULL!	#NULL!	1.3	#NULL!	0.88	2.01	306.9	1	#NULL!	#NULL!	#NULL!	#NULL!	24.33	55	1	1	0	1	1	#NULL!
942408	76	1	21.48	166	87	82	1	1	0	0	1	0	1	0	0	0	UA	0	3.35	130	134	1.97	58.8	0.86	25.7	11	5.7	6.7	29.5	29.9	33	0.91	3.16	1.26	1.48	307	115.8	12.7	#NULL!	11.9	12.49	302.25	68	1	1	0	1	1	0
1161040	78	0	22	109	62	76	1	0	0		0	0	1	0	0	0	UA	1	4.8	105	247	3.17	66.1	#NULL!	#NULL!	11.6	#NULL!	#NULL!	14	#NULL!	41.1	1.83	3.78	1.27	2	307.3	64.5	#NULL!	#NULL!	7.9	#NULL!	115.58	62	1	1	0	1	1	1
1340302	77	1	20.7	117	60	84	1	0	0	1	1	0	1	0	0	0	UA	1	4.11	90	234	2.51	61.1	1.15	28	11.6	4.3	#NULL!	9.7	17.8	35	1.23	4.27	2.83	2.97	308	116.4	10.9	22.43	12.9	689.9	6037	30	1	1	1	0	1	1
1224607	75	1	24.8	125	68	72	1	1	0		1	0	1	0	0	0	UA	0	8.28	189	275	5.57	67.3	#NULL!	#NULL!	10.1	#NULL!	#NULL!	21.2	#NULL!	35	3.01	3.07	0.86	1.46	308.1	92.8	#NULL!	#NULL!	21.5	#NULL!	833	60	1	1	1	1	1	0
987574	81	1	#NULL!	157	90	70	1	0	0		1	#NULL!	#NULL!	#NULL!	#NULL!	#NULL!	STEMI	0	#NULL!	148	#NULL!	#NULL!	#NULL!	#NULL!	#NULL!	#NULL!	#NULL!	#NULL!	27	#NULL!	#NULL!	0.89	#NULL!	1.01	3.27	308.4	72.9	#NULL!	#NULL!	11	#NULL!	1663	30	1	1	1	1	1	#NULL!
1262661	76	1	19.6	170	70	76	0	0	0		1	0	1	0	0	0	UA	1	6.37	64	123	5.23	82.2	#NULL!	#NULL!	10	#NULL!	#NULL!	128.7	#NULL!	33.4	1.21	3.04	0.78	1.86	308.9	504.4	#NULL!	#NULL!	#NULL!	#NULL!	1715.91	54	1	1	0	0	1	1
1187447	77	0	23.04	116	67	70	1	0	0		0	0	0	0	0	0	UA	1	7.86	123	222	5.55	70.5	#NULL!	#NULL!	10.7	6.5	#NULL!	11.7	#NULL!	35.7	1.17	4.21	1.15	2.57	309.7	68.6	#NULL!	#NULL!	15.2	#NULL!	9.77	57	0	1	0	1	1	1
1288340	84	1	#NULL!	117	65	90	0	0	1	0	1	0	0	0	0	0	STEMI	0	5.77	101	212	3.42	59.3	1.35	23.4	10.5	#NULL!	5.5	16.7	41.7	28.7	0.91	3.63	0.91	2.34	310.2	99.5	13.9	39.8	23.8	1521	20772	35	1	1	0	1	1	1
913994	76	0	#NULL!	118	68	66	0	1	0		0	0	1	0	0	0	UA	1	7.5	127	217	3.91	52.4	#NULL!	#NULL!	9.4	5.9	#NULL!	60.4	#NULL!	43.3	1.44	6	1.1	4.27	310.5	57.5	#NULL!	#NULL!	#NULL!	#NULL!	141	67	1	1	1	1	1	0
1313817	80	1	17.9	120	70	92	0	0	0	0	1	0	1	0	0	0	UA	0	5.26	78	267	3.27	62.3	0.61	11.6	11	#NULL!	#NULL!	27.6	34.7	38.7	1.24	5.3	1.42	3.54	310.5	64.8	12.7	26.1	11.5	#NULL!	3116.34	52	1	1	0	0	1	0
1357412	77	0	22.06	140	66	63	0	0	0	0	0	0	0	0	0	0	UA	0	8.68	115	325	4.69	54.1	3.32	38.2	9.3	#NULL!	#NULL!	14.5	16.4	37	1.78	4.5	1.29	2.38	310.9	45.4	13	35.6	5.4	#NULL!	277.7	66	1	1	1	1	1	0
1264525	86	1	25	162	62	62	1	1	0		1	0	1	0	0	0	UA	1	5.82	116	198	4.2	72.2	#NULL!	#NULL!	10.5	8.1	#NULL!	42.3	#NULL!	36.8	1.02	3.57	1.01	2.24	311.3	86.8	#NULL!	#NULL!	11.2	#NULL!	1176.07	63.1	1	1	1	0	1	1
836867	82	1	27	110	64	63	0	1	0		0	0	1	1	0	0	UA	1	4.29	130	217	2.35	54.7	#NULL!	#NULL!	9.9	#NULL!	#NULL!	23.4	#NULL!	35.7	2.16	4.27	0.72	3.1	311.6	129.7	#NULL!	#NULL!	10.7	#NULL!	1155	52	1	1	0	1	1	0
868914	76	1	23.8	169	93	62	1	0	0	0	0	0	1	1	0	0	UA	0	7.25	151	180	5.66	78	1.05	14.5	11.9	4.51	#NULL!	82.7	75.7	38.1	1.59	4.87	1.3	2.95	311.8	83.3	13.3	43.9	8.5	12.47	150.49	62	1	1	1	1	1	0
1217227	77	1	29.2	134	70	64	1	0	0		0	0	0	0	0	0	UA	0	14.76	73	375	13.11	88.8	#NULL!	#NULL!	10.8	#NULL!	#NULL!	22.8	#NULL!	27.1	0.87	3.31	1.03	1.55	312.1	179.2	#NULL!	#NULL!	13	#NULL!	2303	58	1	1	1	1	1	1
1271130	84	0	15.56	108	72	58	0	0	0		0	0	1	0	0	0	NSTEMI	1	3.32	89	167	2.08	62.7	#NULL!	#NULL!	12.2	3.9	#NULL!	12.5	#NULL!	31.1	1.34	3.89	1.17	2.28	312.5	79.5	#NULL!	#NULL!	9.3	#NULL!	3753.96	50	1	1	1	0	1	1
1247558	76	1	#NULL!	96	67	76	0	0	0		1	0	1	0	0	0	STEMI	0	8.92	129	119	8.21	92	#NULL!	#NULL!	13.6	#NULL!	#NULL!	18.1	#NULL!	35.2	0.37	3.71	1.02	1.99	313.6	61.1	#NULL!	#NULL!	29.8	#NULL!	759.76	56	1	1	1	1	1	0
1244690	81	1	#NULL!	142	82	97	1	0	0		0	0	1	0	0	0	STEMI	0	13.37	119	238	12.36	92.5	#NULL!	#NULL!	11.5	#NULL!	#NULL!	34.3	#NULL!	33.8	0.55	4.19	1.26	2.41	313.6	91.7	#NULL!	#NULL!	186.6	#NULL!	761.9	51	#NULL!	1	1	1	1	1
1325415	82	1	22	140	70	71	0	0	0	0	1	1	0	0	0	0	STEMI	0	3.66	120	110	2.73	74.6	0.68	18.6	12.5	#NULL!	#NULL!	33.2	57.6	32	0.63	3.74	0.82	2.24	314.1	67.8	13.3	41.9	29.9	1230	1643.79	42	1	1	1	1	1	0
804643	76	0	#NULL!	191	82	91	1	1	0		0	0	0	0	0	0	UA	1	6.82	79	179	5.33	78.1	#NULL!	#NULL!	10.2	11.1	#NULL!	4.7	#NULL!	34.2	2.81	4.95	0.85	3.06	314.2	188.9	#NULL!	#NULL!	12.5	#NULL!	4403	47	1	1	1	0	1	1
1051102	77	0	#NULL!	142	79	53	1	0	0		0	0	0	0	0	0	NSTEMI	0	6.14	99	231	4.5	73.2	#NULL!	#NULL!	10.3	#NULL!	#NULL!	14.7	#NULL!	31.9	1.49	4.46	0.82	3.27	314.5	66.9	#NULL!	#NULL!	7.1	#NULL!	2043	58	1	1	1	1	1	0
1037943	77	0	#NULL!	134	61	61	1	0	0		0	0	1	0	0	0	STEMI	0	4.32	104	177	2.26	52.4	#NULL!	#NULL!	12	5.1	#NULL!	33	#NULL!	34.5	1.17	4.95	1.1	3.31	314.5	84	#NULL!	#NULL!	21.9	#NULL!	2452	57	1	1	1	0	1	0
1019689	76	0	21.9	163	70	72	1	0	0		0	0	1	0	0	0	UA	1	8.8	125	242	5.7	65.1	#NULL!	#NULL!	11.8	#NULL!	#NULL!	22.7	#NULL!	36.7	1.6	3.15	0.79	1.83	315.1	51.9	#NULL!	#NULL!	12.2	#NULL!	137	63	1	1	0	1	1	0
1159007	80	1	21.68	119	60	78	1	0	0		1	0	1	0	0	0	UA	0	5.8	123	147	4.02	69.8	#NULL!	#NULL!	11.8	#NULL!	#NULL!	26.8	#NULL!	40	0.99	3.26	0.99	1.92	316.4	73.5	#NULL!	#NULL!	14.8	#NULL!	101	58	1	1	0	1	1	0
1371003	79	0	#NULL!	116	62	77	1	1	0	0	0	1	0	0	0	0	NSTEMI	0	0.95	96	120	0.29	30.6	0.52	54.7	10.9	8.5	#NULL!	8	11.2	27.9	1.74	4.01	0.7	2.77	316.8	68.7	14.4	29.7	5	19.89	7841	33	1	0	0	0	1	1
1014256	76	1	19.899	106	66	72	1	0	0		0	0	1	0	0	0	NSTEMI	0	6.4	148	162	4.26	66.3	#NULL!	#NULL!	11.4	#NULL!	#NULL!	28.5	#NULL!	36.8	1.52	4.21	1.09	2.37	316.9	88.6	#NULL!	#NULL!	201	#NULL!	1060	60	1	1	1	1	1	0
1120383	82	0	18.67	110	61	83	1	0	0		0	0	1	0	0	0	UA	1	6.27	109	206	4.73	75.3	#NULL!	#NULL!	10.2	#NULL!	#NULL!	49.6	#NULL!	33.6	0.87	3.99	1.45	2.14	317.1	77.4	#NULL!	#NULL!	11.3	#NULL!	300.42	70	1	1	0	1	1	0
1201225	75	1	18.8	95	49	78	0	0	0		1	1	0	0	0	1	NSTEMI	0	6.39	105	164	4.71	73.7	#NULL!	#NULL!	10	#NULL!	#NULL!	9.4	#NULL!	31.2	0.87	3.76	1.24	2.26	317.3	78.1	#NULL!	#NULL!	11.3	#NULL!	526.63	63	1	1	0	0	1	1
#NULL!	79	1	#NULL!	156	76	76	1	0	0		1	0	1	0	0	0	UA	0	7.9	#NULL!	167	5.67	72	#NULL!	#NULL!	12	#NULL!	#NULL!	#NULL!	#NULL!	35.9	#NULL!	3.62	0.95	#NULL!	318.1	#NULL!	#NULL!	#NULL!	10.7	#NULL!	232	#NULL!	1	1	1	1	1	0
1200855	78	1	26.99	148	94	84	0	0	0		1	0	1	0	0	0	STEMI	0	6.69	142	305	4.39	65.6	#NULL!	#NULL!	10	4.6	#NULL!	44.6	#NULL!	33.3	1.53	3.46	0.81	2.02	318.6	114.5	#NULL!	#NULL!	14.6	#NULL!	1536.99	38	1	1	1	1	1	1
260055	76	1	#NULL!	133	73	72	1	1	0		0	#NULL!	#NULL!	#NULL!	#NULL!	#NULL!	UA	0	#NULL!	132	#NULL!	#NULL!	#NULL!	#NULL!	#NULL!	#NULL!	#NULL!	#NULL!	26.5	#NULL!	#NULL!	1.29	#NULL!	0.95	1.14	318.7	90	#NULL!	#NULL!	14.4	#NULL!	494	50	1	1	0	1	1	#NULL!
1185035	83	1	25.71	148	69	79	1	0	0		0	0	0	0	0	0	NSTEMI	0	3.94	119	137	2.49	63.2	#NULL!	#NULL!	11.2	#NULL!	#NULL!	14.8	#NULL!	39.6	1.4	5.9	1.32	4.09	319.1	106	#NULL!	#NULL!	23.3	#NULL!	883.15	55	1	1	0	0	1	0
1251632	78	1	#NULL!	121	68	75	0	0	0		1	0	0	0	0	0	STEMI	0	8.4	116	137	7.16	85.2	#NULL!	#NULL!	11.1	7.7	#NULL!	19.1	#NULL!	28.1	0.7	3.38	0.77	2.46	319.2	76.5	#NULL!	#NULL!	128.8	#NULL!	1446.46	52	1	1	1	0	1	0
908105	77	0	26.1	131	75	61	1	0	0		0	0	1	0	0	0	UA	1	5.3	#NULL!	133	2.91	54.9	#NULL!	#NULL!	11.6	#NULL!	#NULL!	#NULL!	#NULL!	44.4	1.74	4	#NULL!	#NULL!	319.5	#NULL!	#NULL!	#NULL!	#NULL!	#NULL!	#NULL!	#NULL!	1	1	0	1	1	0
941262	78	1	#NULL!	124	73	69	1	0	0		0	0	1	0	0	0	STEMI	0	5.4	127	205	4.01	73.9	#NULL!	#NULL!	10.3	5.5	#NULL!	12.2	#NULL!	37.3	2.29	4.4	0.92	2.4	320	89.1	#NULL!	#NULL!	14.3	#NULL!	468	53	1	1	0	1	1	1
1180810	77	1	24	189	107	89	1	1	0		0	1	0	1	0	1	STEMI	0	7.31	118	128	6.36	87.1	#NULL!	#NULL!	12.6	#NULL!	#NULL!	45.4	#NULL!	33.7	0.41	3.53	1.14	2.08	320.8	75.4	#NULL!	#NULL!	273.2	#NULL!	5706.09	56	1	1	1	1	1	1
1349681	75	1	19.5	221	100	58	1	0	1	0	1	0	1	1	0	0	UA	1	9.37	126	160	6.95	74.1	1.58	16.9	11.5	4.27	#NULL!	17.4	19.6	36.7	0.48	3	1.23	1.39	322.7	156.8	13.8	39.7	28.4	10.59	1486	66	1	1	1	0	1	0
1360677	80	0	#NULL!	133	74	71	1	0	0	0	0	0	0	0	0	0	UA	0	5.7	122	191	4.07	71.4	1.25	21.9	11.6	#NULL!	#NULL!	11.1	15.5	31.6	1.82	4.21	1.22	2.08	323.1	45.8	11.7	38.2	14.7	#NULL!	967.15	60	1	1	1	1	1	1
1366738	80	1	24.69	125	65	78	1	0	0	0	1	0	0	0	0	0	STEMI	0	8.59	119	145	5.96	69.4	1.68	19.6	12.1	4.31	#NULL!	56.7	146.9	32.1	0.81	3.79	1.24	2.05	323.1	145.9	13.4	43.6	59.8	#NULL!	1880.26	35	1	1	1	1	1	0
1339169	77	0	24.05	112	76	68	1	0	0	0	0	0	1	0	0	0	UA	0	4.46	120	151	2.59	58.1	1.53	34.3	13.3	#NULL!	#NULL!	18.7	20.7	34.2	1	1.82	0.78	0.7	323.2	39	13	39.6	16.9	38.33	848.77	58	1	1	1	1	1	0
1120937	75	0	30.43	140	82	85	1	1	0		0	0	1	0	0	0	UA	0	6.69	93	434	5.24	78.4	#NULL!	#NULL!	10.1	5.8	#NULL!	8.4	#NULL!	25.5	1.53	3.72	0.72	2.3	323.8	81.9	#NULL!	#NULL!	5.3	#NULL!	#NULL!	48	1	0	0	1	1	1
1378328	75	1	#NULL!	99	66	97	0	0	0	0	1	1	1	0	0	1	STEMI	1	7.53	141	125	5.94	78.8	0.9	12	11.9	#NULL!	#NULL!	64.3	97.9	29.9	0.22	2.46	0.67	1.45	324.2	90.7	16.9	51.1	44.5	2531	9933.27	28	1	1	0	0	1	1
275200	84	0	24.73	139	83	69	1	0	0	0	0	0	1	0	0	0	UA	1	8.17	120	200	5.93	72.5	1.3	12.5	11	4.7	#NULL!	15.8	18.5	35.7	0.69	4.51	1.26	2.75	324.3	65	13.7	#NULL!	11.3	16.64	1187.69	58	0	1	1	0	1	1
1106571	88	0	26	151	71	80	1	0	0		0	0	0	0	0	0	UA	1	6.98	113	237	4.95	70.9	#NULL!	#NULL!	12.1	#NULL!	#NULL!	26.7	#NULL!	34.5	1.05	3.62	1.24	1.88	324.4	79.1	#NULL!	#NULL!	7.1	#NULL!	3509	59	1	1	1	1	1	1
1177616	76	0	19.98	112	77	120	1	1	0		1	0	0	0	0	0	UA	1	9.44	148	182	6.48	68.7	#NULL!	#NULL!	11.4	5.6	#NULL!	0	#NULL!	38.4	1.58	3.41	0.95	1.79	325.1	142.8	#NULL!	#NULL!	#NULL!	#NULL!	2497	37	1	1	0	1	1	1
1117414	80	1	25.83	158	74	82	1	0	0		1	0	1	0	0	0	STEMI	0	9.74	137	310	7.23	74.2	#NULL!	#NULL!	9.9	#NULL!	#NULL!	17.8	#NULL!	36.2	1.2	5.63	1.29	3.7	325.2	96.1	#NULL!	#NULL!	183	#NULL!	2357	50	1	1	1	0	1	1
1073661	77	1	21.97	160	104	111	1	0	0		1	1	1	0	0	0	STEMI	1	9.52	95	94	7.88	82.8	#NULL!	#NULL!	12.3	#NULL!	#NULL!	58.9	#NULL!	27.9	0.82	#NULL!	0.64	0.66	325.8	107.7	#NULL!	#NULL!	67.4	#NULL!	15960	56	1	1	1	1	1	1
1130797	80	0	20.19	124	69	53	0	1	0	0	0	0	1	1	0	0	UA	0	5.09	117	165	2.83	55.7	1.6	31.4	10.4	6.2	6.7	18	24.7	37.2	0.64	2.97	1.04	1.57	326.7	68.7	12.3	40.4	16.8	8.99	863.92	66	1	1	1	1	1	0
1020713	76	1	#NULL!	154	77	88	1	0	0		1	1	0	0	0	0	UA	0	5.7	120	275	4.3	75.5	#NULL!	#NULL!	7.9	5	#NULL!	9.7	#NULL!	30.1	0.75	4.03	0.98	2.87	326.8	97	#NULL!	#NULL!	13.1	#NULL!	521	61	1	1	1	1	1	0
1352577	88	1	17.53	118	79	71	0	0	0	1	0	0	0	0	0	0	UA	1	6.18	128	148	4.42	71.5	1.17	18.9	10	4.99	#NULL!	12.4	24.7	34	0.45	3.01	1.35	1.16	327	59.5	13.7	38.9	16.1	8.96	1520	65	1	1	0	0	1	0
1350834	75	1	20.9	144	69	78	1	0	0	0	1	0	0	0	0	0	NSTEMI	0	3.66	133	247	2.05	55.9	1.25	34.2	11.4	5.13	6.4	3.3	16.2	37.9	1.44	4.4	1.35	2.5	327.2	44.6	11.5	27.9	9.3	#NULL!	#NULL!	48	1	1	0	1	1	0
1258600	76	0	17.63	114	64	80	1	1	0		0	0	1	0	0	0	STEMI	1	3.99	98	211	3.09	77.4	#NULL!	#NULL!	13.3	7.6	#NULL!	#NULL!	#NULL!	#NULL!	#NULL!	#NULL!	#NULL!	#NULL!	327.8	#NULL!	#NULL!	#NULL!	18.6	#NULL!	6018.96	45	1	1	0	1	1	1
1097912	75	1	#NULL!	124	70	69	1	1	0		#NULL!	0	0	0	0	0	NSTEMI	0	9.42	132	122	7.69	81.7	#NULL!	#NULL!	12.6	7.6	#NULL!	24.3	#NULL!	34.8	1.46	4.87	1.54	2.82	328.1	118.1	#NULL!	#NULL!	42.2	#NULL!	1373.02	55	1	1	1	0	1	1
1141417	78	1	25.5	136	60	56	1	1	0		1	0	1	0	0	0	UA	1	4.99	98	81	3.49	70	#NULL!	#NULL!	11.8	7.3	#NULL!	23.8	#NULL!	33.7	1	3.53	0.96	2.13	328.3	106.7	#NULL!	#NULL!	10.3	#NULL!	2642.74	62	1	1	1	1	1	1
988032	78	1	#NULL!	179	83	62	1	0	0		1	0	0	0	0	0	UA	0	7.6	141	188	5.58	73.1	#NULL!	#NULL!	12.2	#NULL!	#NULL!	41.6	#NULL!	36.8	0.95	3.75	0.91	2.59	328.4	89.6	#NULL!	#NULL!	8.3	#NULL!	#NULL!	#NULL!	1	0	1	0	1	0
1111670	75	1	#NULL!	117	72	71	0	0	0		0	0	0	0	0	0	UA	1	3.83	113	129	1.86	48.6	#NULL!	#NULL!	12.7	#NULL!	#NULL!	36.9	#NULL!	34.4	0.96	3.5	1.14	2.09	328.6	74.8	#NULL!	#NULL!	9.8	#NULL!	42.72	61	1	1	0	1	1	0
891282	76	0	#NULL!	149	98	113	1	1	0		0	0	1	0	0	0	UA	1	11.85	131	152	10.56	89.01	#NULL!	#NULL!	12.7	9.6	#NULL!	14.8	#NULL!	38.4	#NULL!	3.26	#NULL!	#NULL!	329.1	62	#NULL!	#NULL!	#NULL!	#NULL!	2001	43	1	0	1	1	1	1
989676	84	0	21.11	167	87	80	1	0	0		0	0	1	0	0	0	UA	1	5.92	98	302	5.19	75.1	#NULL!	#NULL!	10	#NULL!	#NULL!	8.4	#NULL!	40.5	0.73	#NULL!	1.76	2.75	329.2	90	#NULL!	#NULL!	7.8	#NULL!	978.57	49	0	1	1	0	1	0
258488	82	0	#NULL!	165	75	75	1	1	0		0	0	1	0	0	0	UA	1	4.1	96	146	2.24	54.2	#NULL!	#NULL!	9.8	4.7	#NULL!	11.8	#NULL!	35.1	1.51	4.06	1.27	1.75	329.4	70.7	#NULL!	#NULL!	14.7	#NULL!	525	55	0	1	1	1	1	1
1345803	75	0	25.81	125	61	78	1	1	0	0	0	0	1	0	0	0	UA	0	8.12	119	216	5.48	67.5	1.92	23.6	9.8	7.33	6.7	12.5	17.8	36.5	0.91	3.81	1.5	2.02	329.5	78.7	12.8	37.9	16.1	3.48	75.8	60	1	1	1	1	1	0
1273197	78	1	29.1	141	73	86	1	1	0		1	0	0	1	0	0	UA	1	3.93	144	146	2.29	58.2	#NULL!	#NULL!	10.1	8.4	#NULL!	20.7	#NULL!	41.6	1.37	3.46	1.02	2.07	329.5	72.1	#NULL!	#NULL!	11.7	#NULL!	670.3	56	1	0	1	1	1	1
1240037	77	1	17.989	141	84	68	0	0	0		1	0	0	0	0	0	STEMI	1	8.89	137	205	#NULL!	73.8	#NULL!	#NULL!	#NULL!	#NULL!	#NULL!	14.6	#NULL!	36.2	0.92	4.02	1.07	2.54	330.2	77.8	#NULL!	#NULL!	22	#NULL!	1587.83	44	1	1	1	1	1	1
964436	77	1	#NULL!	110	70	58	1	0	0		1	0	1	0	0	0	STEMI	0	7.8	83	168	6.07	78.4	#NULL!	#NULL!	13.2	6.3	#NULL!	136.6	#NULL!	35.4	1.52	3.72	0.5	2.92	330.6	81.5	#NULL!	#NULL!	10.1	#NULL!	5689	56	1	1	1	1	1	1
1207798	84	1	#NULL!	106	66	78	1	0	0		0	1	1	0	0	0	STEMI	0	14.42	99	210	10.16	70.5	#NULL!	#NULL!	12.3	#NULL!	#NULL!	19.4	#NULL!	33.1	0.96	3.09	1.34	1.36	332.5	87.2	#NULL!	#NULL!	60.9	#NULL!	4960.96	42	1	1	0	1	1	1
1286207	78	1	23.88	183	61	40	1	1	0	0	1	0	1	1	0	0	UA	1	7.98	134	150	6.97	87.4	0.77	9.6	13.6	6.6	6.4	15	16	30.6	1.32	3.24	0.81	1.77	332.7	67.5	15.1	42.5	15.9	#NULL!	7163	33	1	0	1	1	1	1
957590	78	1	23.2	145	68	63	1	0	0		#NULL!	0	1	0	0	0	UA	0	5.19	122	201	3.25	62.6	#NULL!	#NULL!	9.7	5.2	#NULL!	9.1	#NULL!	34.6	1.67	3.56	0.94	2.18	332.9	122.5	#NULL!	#NULL!	14.7	#NULL!	270	66	1	1	1	0	1	1
780687	79	0	25.3	141	64	49	1	0	0		1	0	1	0	0	0	NSTEMI	0	11.36	101	191	9.54	83.91	#NULL!	#NULL!	12.1	7.6	#NULL!	25.8	#NULL!	39.2	0.47	4.09	1.49	2.32	333.3	233.5	#NULL!	#NULL!	19.4	#NULL!	#NULL!	52	1	1	0	1	1	1
1327869	80	1	21.2	168	83	69	1	0	1	1	1	1	1	1	0	0	NSTEMI	1	4.68	117	181	3.47	74.2	0.64	13.7	8.8	4.91	#NULL!	9.7	12.8	35.3	0.81	2.83	0.97	1.63	333.5	133.3	14.9	44.6	9.6	20.19	5211	53	1	1	1	0	1	1
1376893	75	0	#NULL!	111	78	84	0	1	0	0	0	0	1	0	0	0	STEMI	1	17.6	135	258	15.48	88.6	1.21	6.9	11.9	10.7	7.8	48.2	377.3	37.8	1.26	4.61	1.3	2.93	333.6	52.1	13.3	36.8	655.7	#NULL!	1548	49	1	0	1	1	1	1
1192740	77	0	26.2	115	76	92	0	0	0		0	0	0	0	0	0	STEMI	0	5.97	102	265	3.81	63.8	#NULL!	#NULL!	11	3.3	#NULL!	26.5	#NULL!	30.1	1.03	3.54	1	2.48	333.7	68	#NULL!	#NULL!	23.5	#NULL!	1847	53	1	1	0	1	1	0
1301808	76	0	18	158	67	67	0	0	0	0	0	0	1	0	0	0	UA	1	7.26	102	158	3.62	49.8	2.33	32.1	10.8	4.7	#NULL!	11.8	18	34	1.24	4.3	1.23	2.77	333.9	77	12.5	36.2	14.4	10.86	402.9	55	1	1	1	0	0	1
770470	86	1	#NULL!	125	68	88	0	0	1	1	1	0	0	0	0	0	NSTEMI	0	8.05	119	224	5.56	69	1.39	17.3	11	#NULL!	#NULL!	17.4	100.9	31.1	0.77	4.26	2.04	1.9	334.7	119.5	14.8	#NULL!	89.1	5184	1208	62	1	1	0	0	1	1
1072907	83	1	23.88	148	83	48	1	0	0	1	1	1	1	0	0	0	UA	1	6.22	144	107	4.44	71.4	1.31	21.1	12.2	#NULL!	#NULL!	30.7	19	42.8	0.74	3.26	1.48	1.49	334.9	63	33.6	19.6	10.9	#NULL!	2806.08	55	1	1	1	0	1	1
1344542	81	0	#NULL!	141	62	90	1	1	0	0	0	0	1	0	0	0	STEMI	1	15.37	115	188	13.4	84.8	1.3	8.5	11.9	10.8	7	54.7	261.3	40.6	1.82	4.43	1.2	2.3	335.6	58.1	13	41.4	210.7	2938	5029.16	48	1	1	1	1	1	1
1378358	81	1	27.89	163	86	73	1	0	0	0	1	0	1	0	0	0	UA	1	6.37	126	125	4.25	66.6	1.56	24.5	10.7	6.67	#NULL!	7.6	14.3	35.6	1.81	3.25	0.82	1.94	335.6	71.9	12.1	23.4	14.2	4.66	433.6	58	1	1	0	1	1	0
1123464	77	0	21.36	115	78	77	1	0	0		0	0	0	0	0	0	UA	1	6.73	118	185	4.8	71.4	#NULL!	#NULL!	10.3	6.1	#NULL!	28.6	#NULL!	36.8	1.78	3.58	0.84	2.09	335.8	70.4	#NULL!	#NULL!	44.6	#NULL!	212.56	54	1	1	0	1	1	0
1373914	77	1	25.08	146	76	76	0	0	0	0	0	0	0	0	0	0	UA	0	5.61	123	316	3.68	65.7	1.46	26	9.1	6.46	#NULL!	14.1	17.8	36.3	1.48	3.07	1.01	1.81	336	71.6	13.1	34.4	17.9	20.06	711.4	46	1	1	0	1	1	0
1256193	75	0	#NULL!	137	75	75	0	1	0		0	0	0	0	0	1	STEMI	0	4.9	105	260	3.81	77.8	#NULL!	#NULL!	11.4	8.9	#NULL!	28.5	#NULL!	29.6	1.6	5.56	1.45	3.42	336.2	56.4	#NULL!	#NULL!	#NULL!	#NULL!	3304.28	53	1	0	1	1	0	0
1146281	81	1	#NULL!	86	60	87	1	1	0		0	1	0	0	0	0	STEMI	1	11.09	141	294	9.18	82.7	#NULL!	#NULL!	10	10.7	#NULL!	12.6	#NULL!	33.7	1.72	4.44	0.92	2.79	337.4	127.3	#NULL!	#NULL!	95.9	#NULL!	2642	#NULL!	1	1	0	0	1	1
997713	75	1	#NULL!	115	70	70	1	1	0		1	#NULL!	#NULL!	#NULL!	#NULL!	#NULL!	UA	0	#NULL!	122	#NULL!	#NULL!	#NULL!	#NULL!	#NULL!	#NULL!	#NULL!	#NULL!	13.9	#NULL!	#NULL!	1.07	#NULL!	0.89	3.23	337.6	63.9	#NULL!	#NULL!	10.4	#NULL!	149	68	1	1	0	1	1	#NULL!
1193212	75	1	28.32	155	86	66	1	0	0		1	0	1	0	0	0	UA	0	5.72	123	224	3.61	63.1	#NULL!	#NULL!	11.8	7.13	#NULL!	27.4	#NULL!	34.8	0.71	3.8	0.88	2.63	337.6	80.4	#NULL!	#NULL!	14.6	#NULL!	168.61	66	1	1	1	0	1	0
1095136	82	1	24.58	128	70	90	0	0	0	0	1	0	1	1	0	0	NSTEMI	0	9.52	133	253	7.37	77.4	1.57	16.5	10.6	#NULL!	5.8	31.7	91.2	34.2	#NULL!	#NULL!	#NULL!	#NULL!	339.1	73.5	11.2	149.9	42	1314	2055.19	58	1	1	0	1	1	1
1308329	82	1	#NULL!	174	108	104	1	1	0	0	0	0	1	0	0	0	UA	1	7.48	125	112	5.63	75.4	1.29	17.2	12.1	#NULL!	#NULL!	44.5	57.9	32.1	1.33	4.18	1.51	1.81	339.1	98.7	14.7	40.3	14.4	127.7	33806	38	1	1	1	1	1	1
1354396	76	1	23.3	158	106	92	1	0	0	0	0	0	1	0	0	0	UA	#NULL!	4.29	138	130	2.68	52.6	1.01	23.5	13.1	5.39	#NULL!	30.5	56.3	39.6	1.9	4.44	0.094	2.99	339.4	124.5	11.4	30	12.3	13.08	493	62	1	1	1	1	1	0
1282677	75	1	25.65	146	83	74	1	0	0		0	1	1	0	1	0	UA	1	4.47	146	167	2.83	63.3	#NULL!	#NULL!	10.4	#NULL!	#NULL!	23.9	#NULL!	37	1.12	3.38	1.4	1.7	339.4	52.2	#NULL!	#NULL!	13.7	#NULL!	2889.53	49	1	1	1	1	1	0
948355	77	1	#NULL!	153	88	76	1	0	0		1	0	1	0	0	0	STEMI	0	6.9	146	173	4.81	69.8	#NULL!	#NULL!	8.9	#NULL!	#NULL!	29.2	#NULL!	37.7	2.15	5.69	0.78	4.15	340.6	115.2	#NULL!	#NULL!	71.6	#NULL!	2891	#NULL!	1	1	1	1	1	1
1373399	80	0	26.9	163	89	70	1	1	0	0	0	0	1	0	0	0	UA	1	5.81	131	173	4.22	72.6	1.22	21	11.1	5.6	#NULL!	25.6	25	35.8	1.2	3.56	1.23	1.76	341.1	78.2	13.6	35.3	10.7	5.74	275.8	59	1	0	0	1	0	0
1046630	75	1	#NULL!	140	70	72	0	1	0		1	0	1	0	0	0	NSTEMI	1	5.75	140	142	4.95	86.11	#NULL!	#NULL!	11.1	9.3	#NULL!	26.3	#NULL!	35.1	2.42	5.03	0.96	3.32	341.6	96.4	#NULL!	#NULL!	12.6	#NULL!	#NULL!	62	1	1	0	1	1	1
1326338	75	1	19.72	115	85	61	0	0	0	0	1	0	1	0	0	0	STEMI	0	6.99	128	159	6.01	85.9	0.57	8.2	11.5	4.73	5.5	23.8	105.5	36.2	1.74	4.86	1.14	3.29	342.8	80.6	14.7	40	105.7	4770	2076.54	55	1	1	0	0	1	0
2024727	77	0	28.1	120	65	75	1	1	0		#NULL!	1	1	0	0	0	UA	0	9.5	130	221	6.45	67.7	#NULL!	#NULL!	12	9.4	#NULL!	9.9	#NULL!	39.4	1.2	3.18	1.07	1.46	343.6	61.7	#NULL!	#NULL!	#NULL!	#NULL!	49	60	1	1	1	1	1	0
1020915	83	1	#NULL!	88	52	71	1	0	0	0	1	1	1	0	0	0	NSTEMI	0	3.99	132	249	1.78	44.6	1.62	40.6	12.5	6.5	#NULL!	20.6	29.2	28.8	1.22	3.74	0.91	2.36	343.7	91	12.4	25.8	62.4	5188	3710.45	40	1	1	1	0	1	1
1256060	77	1	22.4	158	65	72	1	1	0		1	0	0	1	0	0	NSTEMI	1	6.58	116	143	5.46	83	#NULL!	#NULL!	11	8.2	#NULL!	35.5	#NULL!	32.6	1.37	3.13	0.76	2.03	344.1	85.5	#NULL!	#NULL!	7.8	#NULL!	1350	55	1	1	1	1	1	0
1236814	75	1	23.15	159	77	56	1	0	0		1	0	1	0	0	0	UA	0	3.59	119	137	2.25	62.7	#NULL!	#NULL!	11.1	#NULL!	#NULL!	13.8	#NULL!	35.2	1.73	3.02	0.77	1.84	344.1	84.5	#NULL!	#NULL!	9.8	#NULL!	722.59	56	1	1	1	1	1	1
1119591	77	0	22.31	173	67	67	1	1	0		0	0	0	0	0	0	STEMI	1	3.89	103	143	2.24	57.5	#NULL!	#NULL!	10.1	4.6	#NULL!	13.2	#NULL!	34.3	1.91	3.64	0.92	1.87	344.3	75.9	#NULL!	#NULL!	5	#NULL!	380.62	65	1	0	1	1	1	1
1291082	77	1	25	133	79	88	1	0	1	0	1	1	1	0	0	1	UA	1	10.42	87	299	9.1	87.3	0.1	#NULL!	10.8	#NULL!	#NULL!	21.7	55.5	29.6	0.89	2.88	0.81	1.73	344.5	116.6	14.1	48.7	10.5	#NULL!	746.24	#NULL!	1	1	1	1	1	1
940634	78	1	#NULL!	180	92	68	1	0	0		1	0	1	0	0	0	UA	0	8.6	127	228	4.1	47.6	#NULL!	#NULL!	10.6	#NULL!	#NULL!	14.8	#NULL!	40.6	1.41	#NULL!	1.22	2.76	345	85	#NULL!	#NULL!	#NULL!	#NULL!	267	68	1	0	1	1	1	0
1310391	80	1	#NULL!	157	88	88	1	0	1	1	1	0	0	0	0	0	STEMI	0	10.12	120	209	7.58	74.9	1.5	14.8	11	#NULL!	5.5	24.7	62.6	34	3	4.87	1.08	2.7	345.1	111.2	13.1	43	36.5	3555	2236	54	1	1	1	1	1	0
1374991	79	0	24.2	130	67	68	1	0	0	0	0	0	1	0	0	1	UA	1	5.22	132	225	3.51	67.2	1.25	23.9	10.1	4.4	#NULL!	12.9	27.1	30.2	0.87	4.04	1.16	2.46	345.3	94.1	19.1	32.5	15.3	18.15	1326.44	#NULL!	0	0	0	0	1	0
647296	87	1	#NULL!	140	75	84	1	0	0		0	0	1	0	0	0	STEMI	0	11.3	123	193	8.49	75.1	#NULL!	#NULL!	9.5	#NULL!	#NULL!	29.2	#NULL!	35.1	1.01	5.94	1.25	4.2	345.4	79.9	#NULL!	#NULL!	7.3	#NULL!	3329	#NULL!	1	1	1	1	1	0
432013	76	1	22	108	69	55	1	0	0	0	0	1	1	0	0	1	UA	0	6.51	156	149	4.45	68.4	1.38	21.2	12.4	#NULL!	6.3	13.3	14.1	36.9	1.3	3.05	0.69	1.85	346	86.2	#NULL!	#NULL!	19.7	#NULL!	28.5	57	0	0	1	1	1	1
1367318	82	1	#NULL!	154	77	103	1	0	0	0	0	0	0	0	0	1	STEMI	1	18.55	115	349	17.26	93	0.47	2.5	10.6	#NULL!	5.4	48.1	122	35.3	0.7	2.46	1.06	0.83	346.2	100.6	18.4	45.7	30.4	#NULL!	9418.04	40	1	1	1	1	1	1
1360290	77	1	21.94	150	86	76	1	0	0	0	0	1	0	0	0	0	UA	0	6.79	166	143	4.16	61.3	1.93	28.4	12.3	4.7	7	40.3	32.8	34.9	1.61	4.33	0.93	3.01	346.3	64.2	13.9	34.5	12.1	26.73	324.3	55	1	1	1	1	1	0
953092	75	1	#NULL!	150	100	83	1	0	0		1	0	1	1	0	0	UA	0	6.7	137	162	4.4	65.7	#NULL!	#NULL!	13	#NULL!	#NULL!	19.7	#NULL!	#NULL!	1.14	3.19	0.88	1.76	346.6	101.2	#NULL!	#NULL!	14.2	#NULL!	107	60	1	1	0	1	1	0
1318163	81	1	22.27	134	57	55	0	0	0	0	1	0	1	0	0	0	UA	1	5.14	124	177	3.59	69.8	0.72	14	11.5	4.21	#NULL!	24.3	26.9	26.3	0.65	3.09	1.14	1.56	346.9	86.1	13.5	34.9	20.1	9.09	691.7	52	1	1	1	1	1	1
1364651	79	1	#NULL!	159	80	70	1	0	0	0	0	0	1	1	0	0	UA	0	5.38	159	147	3.49	64.8	1.23	22.9	14.3	#NULL!	5.7	18.8	18.8	35.1	0.74	4.14	1.13	2.65	347.1	64.5	12.5	33.9	16.4	8.15	85.02	61	1	1	1	0	1	0
1018682	78	0	36.4	145	79	77	1	0	0		0	0	1	1	1	0	UA	0	6.3	130	197	4.41	69.6	#NULL!	#NULL!	9.9	#NULL!	#NULL!	20	#NULL!	39.2	3.07	4.63	1.17	2.45	347.3	69.2	#NULL!	#NULL!	127	#NULL!	287	50	1	1	0	1	#NULL!	1
#NULL!	80	1	29.93	110	80	79	0	0	0		0	0	1	1	0	0	NSTEMI	0	7.83	144	149	5	63.8	#NULL!	#NULL!	11	5.2	#NULL!	11.5	#NULL!	39.4	1.11	4.39	0.99	2.69	347.3	71.3	#NULL!	#NULL!	10.5	#NULL!	114.11	57	1	1	0	1	1	1
1305133	77	1	21.26	112	56	86	0	0	0	1	1	0	1	0	0	0	STEMI	0	6.56	126	158	4.49	68.4	1.47	22.4	10.2	5.56	#NULL!	15.5	9.3	36.1	1	4.25	1.1	2.62	347.8	111.5	13.5	#NULL!	12.8	51.68	2328	35	1	1	1	1	1	1
1083695	79	1	26	133	76	72	0	0	0		0	0	1	0	0	0	STEMI	0	6.58	117	202	4.13	62.84	#NULL!	#NULL!	9.5	#NULL!	#NULL!	14	#NULL!	37.3	0.98	3.87	1.12	2.5	347.9	63.3	#NULL!	#NULL!	6.4	#NULL!	1310.19	46	1	1	1	1	1	1
1283265	81	1	24.2	162	94	80	1	1	0		0	0	0	0	0	0	STEMI	0	10.13	141	167	9.13	90.2	#NULL!	#NULL!	10.9	7.5	#NULL!	86	#NULL!	39.1	0.36	4.34	1.44	2.58	348.5	117.9	#NULL!	#NULL!	92.1	#NULL!	898.9	66	1	1	1	1	1	1
1331081	78	1	25.71	130	73	74	0	0	1	1	1	0	1	1	0	0	UA	1	4.37	132	162	2.62	59.9	1.21	27.7	10.8	#NULL!	#NULL!	26.6	20.1	39.7	2.72	2.96	1.04	1.23	348.6	153.9	12.8	38.1	12.9	26.44	155.26	52	1	1	1	1	1	0
1245949	77	0	21.6	135	65	75	1	0	0		0	0	0	1	0	0	UA	1	5.56	124	231	4.33	77.9	#NULL!	#NULL!	11.1	#NULL!	#NULL!	9.8	#NULL!	31	1.88	3.29	0.75	2.17	349	83.2	#NULL!	#NULL!	#NULL!	#NULL!	169.21	50	1	1	1	1	1	0
1237845	75	1	25.4	145	81	95	1	1	0		1	0	0	0	0	0	UA	1	4.37	102	237	1.9	43.5	#NULL!	#NULL!	9.3	9.2	#NULL!	13.7	#NULL!	31	1.61	3.59	1.13	2.12	349.4	121.1	#NULL!	#NULL!	10.6	#NULL!	2981	67	1	0	1	1	1	1
1082586	77	0	32.84	135	69	72	1	1	0		0	0	1	0	0	1	STEMI	0	7.14	92	280	4.64	65	#NULL!	#NULL!	11.5	7.6	#NULL!	31.7	#NULL!	33.7	1.27	4.65	1.21	2.97	349.9	121.2	#NULL!	#NULL!	5.8	#NULL!	1855.98	55	1	1	1	1	1	1
1216128	78	0	25.2	150	60	60	1	0	0		0	0	1	0	0	0	UA	1	6.39	117	166	4.17	65.3	#NULL!	#NULL!	10.3	#NULL!	#NULL!	11.5	#NULL!	38.7	2.25	4.53	1.08	2.85	350.3	78.1	#NULL!	#NULL!	16.3	#NULL!	185.48	54	1	1	1	1	1	0
1162152	84	0	22.83	135	64	68	1	0	0		0	0	0	0	0	0	UA	1	7.48	116	249	5.23	70.1	#NULL!	#NULL!	10.3	#NULL!	#NULL!	24.7	#NULL!	39.2	0.89	3.21	1.5	1.34	350.5	80.2	#NULL!	#NULL!	10	#NULL!	98.81	56	1	1	1	1	1	0
1322163	79	1	22.67	148	84	85	0	0	0	0	1	0	0	0	0	0	NSTEMI	0	6.31	100	251	4.9	77.6	0.91	14.4	10.7	4.26	#NULL!	14.6	15.3	38.3	0.87	2.78	0.82	1.61	350.7	80.7	14.3	44.1	12.4	#NULL!	1283.17	52	1	1	1	0	1	1
1240001	82	1	18.73	143	79	58	0	0	0		0	0	0	0	0	0	UA	0	5.18	115	219	3.1	59.8	#NULL!	#NULL!	10.2	#NULL!	#NULL!	26	#NULL!	33.5	1.05	5.34	1.29	3.78	350.8	68.4	#NULL!	#NULL!	#NULL!	#NULL!	72.47	59	1	0	0	0	1	0
1173269	78	1	#NULL!	102	57	78	1	0	0		1	0	0	0	0	0	UA	0	4.27	70	109	3.17	74.3	#NULL!	#NULL!	9.1	#NULL!	#NULL!	6	#NULL!	#NULL!	#NULL!	#NULL!	#NULL!	#NULL!	351.2	82	#NULL!	#NULL!	#NULL!	#NULL!	#NULL!	#NULL!	1	1	1	0	0	0
1352596	76	0	23.81	126	66	75	0	0	0	0	0	0	1	0	0	0	NSTEMI	0	5.46	118	167	2.67	48.9	2.29	41.9	13.1	4.4	#NULL!	16.1	25.3	36.4	2.01	4	0.87	2.63	351.4	53.8	12.6	40.4	17.5	425.3	977.3	58	1	1	1	1	1	0
1203750	84	1	22	103	57	85	1	0	0		0	1	1	0	0	0	NSTEMI	1	5.11	133	292	4.09	80	#NULL!	#NULL!	10.1	#NULL!	#NULL!	7.1	#NULL!	28.1	0.87	4.25	1.08	2.73	351.5	91.1	#NULL!	#NULL!	11.3	#NULL!	7961.67	39	0	1	1	1	1	1
1270878	75	1	25.8	127	60	62	1	1	0		0	0	1	0	0	0	UA	1	6.04	111	106	2.87	47.5	#NULL!	#NULL!	9.4	8.1	#NULL!	14.5	#NULL!	40.9	1.41	2.67	0.9	1.3	351.6	88	#NULL!	#NULL!	20.7	#NULL!	2013.56	40	1	1	0	1	1	0
1065228	77	0	#NULL!	150	88	87	0	0	0		1	1	1	0	0	0	STEMI	1	10.41	112	313	8.32	79.9	#NULL!	#NULL!	10.9	4.77	#NULL!	28.2	#NULL!	31.2	1.62	4.3	0.71	1.9	351.7	64.1	#NULL!	#NULL!	14.5	#NULL!	4573.39	#NULL!	1	1	1	1	1	1
520451	75	1	28.63	106	70	82	1	0	0		0	0	1	1	0	0	UA	0	12.3	125	162	8.34	71.8	#NULL!	#NULL!	9	#NULL!	#NULL!	23.3	#NULL!	37.6	2.18	2.99	0.9	1.5	351.8	96.1	#NULL!	#NULL!	#NULL!	#NULL!	352	65	1	1	1	1	1	1
1001451	76	1	20.3	133	62	70	0	1	0		#NULL!	0	1	1	0	0	UA	0	5.5	148	160	3.26	58.9	#NULL!	#NULL!	8.8	6.9	#NULL!	14.4	#NULL!	37.7	1.73	3.88	0.85	2.41	352.1	101	#NULL!	#NULL!	#NULL!	#NULL!	#NULL!	67	1	1	1	1	1	0
1037072	84	0	16.02	137	78	64	1	0	0		0	0	1	1	0	0	UA	1	5.11	109	165	3.96	77.51	#NULL!	#NULL!	12.5	#NULL!	#NULL!	8.7	#NULL!	40.4	1.62	3.49	1.01	1.84	352.3	89.7	#NULL!	#NULL!	6.6	#NULL!	594	67	1	1	0	1	1	0
1157376	83	1	#NULL!	151	63	91	1	1	0		0	0	0	0	0	0	STEMI	0	4.03	121	136	2.48	61.6	#NULL!	#NULL!	10.9	7.6	#NULL!	39.9	#NULL!	33.8	1.1	4.68	1.66	2.55	352.3	93.7	#NULL!	#NULL!	17.2	#NULL!	1974	47	1	1	1	1	1	1
1105814	77	1	29	94	50	75	0	0	0		0	0	1	1	0	0	UA	0	5.39	126	140	3.03	59.4	#NULL!	#NULL!	9.3	#NULL!	#NULL!	#NULL!	#NULL!	#NULL!	0.67	1.67	0.86	0.62	352.4	#NULL!	#NULL!	#NULL!	#NULL!	#NULL!	#NULL!	60	1	1	1	1	1	0
1339195	77	0	22.7	121	87	87	1	0	0	0	0	0	1	1	0	0	UA	0	7.02	110	238	4.63	65.9	1.67	23.8	9.7	#NULL!	6.2	19.6	23.2	40.3	1.32	6.4	1.58	4.49	353.4	59.4	12.1	37.8	16.4	12.3	166	55	1	1	1	1	1	1
1170659	81	1	21.45	116	74	70	0	0	0		0	0	0	0	0	0	UA	0	5.39	118	104	3.93	72.9	#NULL!	#NULL!	#NULL!	#NULL!	#NULL!	31.8	#NULL!	39.5	1.33	3.88	1.01	2.51	353.6	92	#NULL!	#NULL!	7.9	#NULL!	959	58	1	1	1	1	0	0
965447	77	0	#NULL!	99	52	78	0	0	0		0	0	0	0	0	1	STEMI	0	12.1	93	426	10.43	86.2	#NULL!	#NULL!	8.4	7.9	#NULL!	40.8	#NULL!	31	#NULL!	4.1	#NULL!	#NULL!	353.7	79.4	#NULL!	#NULL!	27.7	#NULL!	7644	#NULL!	1	1	0	1	1	1
1253159	90	0	0	150	75	45	1	1	0		0	0	0	0	0	0	STEMI	1	6.97	117	168	4.26	61.2	#NULL!	#NULL!	11.1	#NULL!	#NULL!	24.8	#NULL!	31.7	2.35	2.71	0.72	1.59	354.2	89.7	#NULL!	#NULL!	17.3	#NULL!	1475	56	1	1	1	0	1	1
947685	77	1	20.04	158	68	89	1	1	0		0	0	1	0	0	0	UA	0	4.9	131	116	3.07	62.5	#NULL!	#NULL!	9.3	#NULL!	#NULL!	8.8	#NULL!	37.1	2.06	3.06	0.87	1.42	354.2	89.7	#NULL!	#NULL!	16.9	#NULL!	98	56	0	1	1	1	1	0
1201801	75	1	22.7	182	93	78	1	0	0		1	0	1	0	0	0	UA	0	6.89	141	263	4.48	65	#NULL!	#NULL!	9.2	#NULL!	#NULL!	13.5	#NULL!	37	0.73	3.84	1.24	2.31	354.2	70.1	#NULL!	#NULL!	14	#NULL!	154.1	58	1	1	1	1	1	0
1128249	78	0	31.22	144	59	78	1	0	0		0	0	0	0	0	0	NSTEMI	0	8.68	86	224	6.67	76.8	#NULL!	#NULL!	8.9	#NULL!	#NULL!	33.9	#NULL!	38.2	2.44	3.5	0.92	1.82	355	91.3	#NULL!	#NULL!	12.3	#NULL!	1832	70	1	1	1	1	1	1
1358893	78	1	25.53	130	73	81	1	0	0	0	0	0	0	0	0	0	NSTEMI	0	9.78	82	418	6.95	71.1	1.7	17.4	9	5.8	6	9	17.1	33.9	2.65	6.17	1.04	4.35	355.4	166.2	12.4	36	11.4	21.1	448.5	61	1	1	1	1	1	1
1160204	82	1	24.54	128	61	76	1	0	0		1	0	0	0	0	0	NSTEMI	1	6.06	127	168	4.58	75.5	#NULL!	#NULL!	11.5	#NULL!	#NULL!	68.5	#NULL!	41.2	1.12	3.85	1.11	2.34	355.4	151.1	#NULL!	#NULL!	#NULL!	#NULL!	1847.81	59	1	1	0	1	1	1
1226099	79	1	#NULL!	145	66	61	1	1	0		0	0	0	1	0	0	UA	1	4.17	93	139	3.07	73.7	#NULL!	#NULL!	10.9	6.7	#NULL!	#NULL!	#NULL!	35.3	1.19	3.47	1.1	1.82	355.8	293	#NULL!	#NULL!	15.4	#NULL!	1037	54	0	1	1	1	1	0
1371699	77	0	25.93	125	70	59	0	1	0	0	0	0	1	0	0	0	NSTEMI	0	6.32	114	143	3.99	63.1	1.66	26.3	11.6	4.23	7.4	32.7	35.6	41	3.75	3.5	0.73	1.95	355.9	74.2	13.1	50.2	14.7	55.88	468.8	59	1	1	1	1	1	0
1357865	74	1	#NULL!	179	90	64	1	0	0	0	1	1	1	0	0	0	UA	0	3.93	109	140	2.26	57.4	1.13	28.8	10	5.6	6.2	32.1	28.8	32.7	3.21	3.64	0.9	2.03	356.8	91.3	13.1	36.3	12.6	16.32	798.28	55	1	0	1	1	1	0
894102	78	0	#NULL!	143	71	71	1	0	0		0	1	1	0	0	0	UA	1	7.6	123	303	5.39	71	#NULL!	#NULL!	9.5	#NULL!	#NULL!	18.7	#NULL!	41.3	9.4	5.25	0.89	1.25	357.5	107.4	#NULL!	#NULL!	10.5	#NULL!	11.38	#NULL!	1	1	1	1	1	0
965576	77	0	#NULL!	117	70	70	1	1	0		#NULL!	0	1	1	0	1	UA	1	6.7	#NULL!	119	4.92	73.1	#NULL!	#NULL!	11.6	4.9	#NULL!	10.5	#NULL!	39.3	2.69	4.47	0.83	2.29	357.6	#NULL!	#NULL!	#NULL!	#NULL!	#NULL!	229	#NULL!	1	1	0	1	1	0
1320606	76	1	24.4	106	74	78	1	0	0	0	1	0	1	0	0	0	UA	1	4.8	145	185	3.46	72.1	0.89	18.5	10.2	5.1	#NULL!	17.6	26.7	35.8	2.44	2.47	0.83	1.19	357.6	79.2	13.3	#NULL!	13.7	#NULL!	201.53	57	1	1	1	1	1	0
1113010	75	1	#NULL!	129	72	108	1	1	0		1	0	0	0	0	0	UA	1	13.31	123	370	7.42	55.8	#NULL!	#NULL!	11	10.6	#NULL!	11.7	#NULL!	34.2	1.27	3.57	1.13	1.91	358.2	91.5	#NULL!	#NULL!	#NULL!	#NULL!	3723.98	#NULL!	1	1	1	1	1	1
1323407	79	1	26.45	149	86	85	1	0	0	0	0	0	1	0	0	0	UA	1	7.69	144	115	4.91	63.9	2.16	28.1	12.4	4.51	#NULL!	14.2	21.2	38.6	1.11	4.1	0.92	2.76	358.6	94.4	12.4	45.2	13	#NULL!	846.93	52	1	1	1	0	1	0
1317496	79	1	18.37	114	64	74	0	0	0	0	0	0	1	1	0	0	STEMI	0	7.3	107	166	4.29	58.5	2.27	31.1	10.4	#NULL!	5.4	8.8	16.2	34.9	0.78	3.83	1.39	2.01	359.1	85.4	13.4	33	19.1	#NULL!	2015.48	48	1	1	0	1	1	0
1060884	77	1	#NULL!	134	80	72	1	1	0		0	0	1	0	0	0	STEMI	0	10.76	99	138	9.51	88.4	#NULL!	#NULL!	13	7.1	#NULL!	39.4	#NULL!	32.8	1.37	3.78	0.84	2.34	360.2	184.6	#NULL!	#NULL!	52.8	#NULL!	2800	74	1	1	1	1	1	0
1030428	75	1	#NULL!	142	63	75	1	0	0		1	0	0	0	0	0	STEMI	0	15.55	145	178	11.9	76.6	#NULL!	#NULL!	13.6	8.4	#NULL!	32.2	#NULL!	38.4	2.97	5.73	0.92	2.95	360.8	81.8	#NULL!	#NULL!	52	#NULL!	1432	50	1	1	1	1	1	1
1235574	76	1	22.83	136	70	57	1	1	0		1	0	1	0	0	1	UA	0	6.1	135	146	3.63	59.5	#NULL!	#NULL!	11.4	#NULL!	#NULL!	18.3	#NULL!	34.4	0.48	2.52	0.86	1.4	360.9	86.9	#NULL!	#NULL!	16.1	#NULL!	210.3	59	1	1	0	1	1	0
980795	76	1	#NULL!	169	80	72	1	0	0		1	1	1	1	0	0	UA	0	5.2	115	171	3.8	73.7	#NULL!	#NULL!	11.7	#NULL!	#NULL!	18.1	#NULL!	39.7	1	3.78	1.49	1.51	361	98	#NULL!	#NULL!	14.3	#NULL!	83	70	1	1	1	1	1	0
1274015	78	1	26.57	130	78	102	1	0	0		1	1	0	0	0	0	UA	0	6.98	123	220	4.08	58.5	#NULL!	#NULL!	8	#NULL!	#NULL!	16.9	#NULL!	37.9	1.63	3.91	0.93	2.48	361	98.6	#NULL!	#NULL!	20.4	#NULL!	1918.36	50	1	1	1	1	1	1
1371846	78	0	#NULL!	128	58	81	1	1	0	0	0	0	1	0	0	0	STEMI	0	4.64	100	162	2.7	58.2	1.48	31.9	11	8.08	7.1	21.4	37.6	35.5	4.22	7.93	1.32	5.66	361.4	134	13.9	38	4.9	565.1	4240	58	1	1	1	1	1	1
1350340	80	1	#NULL!	164	70	109	1	0	0	1	0	0	0	0	0	0	NSTEMI	0	9.17	133	119	8.1	88.4	0.57	6.2	9	6.3	#NULL!	53.1	125.2	33.6	0.95	4.48	1.45	2.44	361.6	66.7	15.5	26.7	65.9	676.5	#NULL!	43	1	1	1	0	1	1
948733	83	1	24.2	140	64	98	0	0	0		0	0	1	1	0	0	UA	1	#NULL!	#NULL!	#NULL!	#NULL!	#NULL!	#NULL!	#NULL!	#NULL!	#NULL!	#NULL!	14.1	#NULL!	39.1	0.99	2.77	0.8	1.7	363	126.7	#NULL!	#NULL!	#NULL!	#NULL!	519	57	1	1	1	1	1	0
1000228	76	1	24.24	117	68	73	1	0	0		1	0	1	0	0	0	UA	0	5.7	139	206	4.01	70.3	#NULL!	#NULL!	11.8	#NULL!	#NULL!	14.3	#NULL!	40.6	#NULL!	#NULL!	#NULL!	#NULL!	363.3	85.7	#NULL!	#NULL!	#NULL!	#NULL!	56	#NULL!	1	0	0	0	1	0
1130797	79	0	19.47	127	77	65	0	1	0		0	0	0	1	0	0	UA	0	4.08	3.86	129	2.33	57.2	#NULL!	#NULL!	11.4	7.3	#NULL!	16.4	#NULL!	36.7	0.71	3.09	1.31	1.51	363.6	69.6	#NULL!	#NULL!	18.3	#NULL!	236	70	1	1	0	1	1	0
1263508	75	0	23.14	130	63	70	1	0	0	0	0	0	1	0	0	0	UA	1	7.47	128	138	5.51	73.7	1.09	14.6	12	#NULL!	5.5	16.2	18.9	39.9	1.46	2.82	1.04	1.42	364.2	54.2	13.1	#NULL!	12.3	#NULL!	314.23	58	1	1	0	1	1	0
1365817	78	1	19.3	103	90	68	0	0	0	1	1	0	1	0	0	0	UA	1	3.65	128	147	2.86	78.3	0.5	13.7	10.7	4.6	#NULL!	8.8	17.8	33.9	0.8	3.22	0.97	1.84	364.3	71.1	13.6	38.5	19.3	10.37	3919.25	31	#NULL!	1	1	1	1	1
676725	75	0	19.7	157	77	75	0	0	0		0	0	1	0	0	0	UA	0	5.64	114	142	4.36	77.3	#NULL!	#NULL!	11.1	#NULL!	#NULL!	11.7	#NULL!	37.6	1.51	4.4	1.23	2.84	364.5	73.5	#NULL!	#NULL!	#NULL!	#NULL!	624.08	54	1	1	0	0	1	0
998737	75	0	#NULL!	116	84	80	1	0	0		0	0	1	0	0	0	NSTEMI	0	9.7	94	243	7.57	78.5	#NULL!	#NULL!	10.9	#NULL!	#NULL!	19.1	#NULL!	36.8	#NULL!	#NULL!	#NULL!	#NULL!	364.8	63.8	#NULL!	#NULL!	19.1	#NULL!	2367	61	1	1	1	1	1	0
1039426	80	1	#NULL!	145	68	71	1	1	0		0	1	1	0	0	0	UA	1	5.64	120	177	3.91	69.4	#NULL!	#NULL!	11.7	6.6	#NULL!	9.2	#NULL!	41.9	0.92	4.19	1.08	2.85	365.8	144.7	#NULL!	#NULL!	13.8	#NULL!	2131	45	0	1	1	1	1	1
1158192	78	1	22.5	123	79	67	0	0	0		1	0	1	0	0	0	STEMI	0	11.1	105	155	9.15	82.5	#NULL!	#NULL!	11.2	5.1	#NULL!	79	#NULL!	31.6	1.02	3.6	1.11	2.19	366.1	132.8	#NULL!	#NULL!	96.9	#NULL!	1935.87	45	1	1	1	1	1	1
1288856	81	1	26.35	159	94	101	0	0	0	0	0	0	0	0	0	0	STEMI	0	8.61	156	169	7.75	90	0.5	5.8	9.6	#NULL!	5.7	68.8	306.3	39	0.68	2.62	0.96	1.4	366.5	88.6	14.2	51.4	275.9	#NULL!	317.8	60	1	1	1	1	1	0
1354515	79	1	21.22	162	83	68	1	1	0	0	1	0	0	0	0	0	UA	0	5.83	124	178	3.88	66.6	1.32	22.6	12.2	6.1	6.8	30.2	21.7	37	1.52	4.07	0.83	2.76	366.6	166.6	13.4	39.8	6.2	15.93	815.8	52	1	1	1	1	1	1
1303990	75	1	27.8	105	68	60	1	0	0	0	0	1	0	0	1	0	UA	0	4.9	135	181	2.71	55.3	1.57	32	10.4	#NULL!	#NULL!	16.7	16.9	37.7	1.21	3.46	0.98	2.2	366.8	74.2	#NULL!	#NULL!	#NULL!	#NULL!	385.78	58	1	1	1	1	1	0
1268892	78	1	25.6	160	90	79	1	0	0		1	0	1	0	0	0	UA	0	5.12	137	194	3.08	60.1	#NULL!	#NULL!	10.2	4.9	#NULL!	10.1	#NULL!	40.9	2.14	6.24	1.02	4.74	366.8	81.3	#NULL!	#NULL!	10.6	#NULL!	891.66	52	1	1	1	1	1	0
1329214	75	1	24.48	173	85	65	1	1	0	0	#NULL!	0	1	0	1	0	NSTEMI	0	5.12	135	148	2.81	54.9	1.78	34.8	12.6	8.81	#NULL!	28.1	23.5	35.2	2.75	3.52	0.82	2.12	366.9	87.3	11.4	34.9	9.2	20.52	517.95	58	1	1	1	1	1	0
1253765	82	1	20.76	158	93	94	1	0	0		0	0	1	0	0	0	NSTEMI	0	6.6	122	180	5.92	89.6	#NULL!	#NULL!	10.5	#NULL!	#NULL!	21	#NULL!	34.2	0.59	4.29	1.53	2.32	367.1	96.3	#NULL!	#NULL!	13.6	#NULL!	4601	28	1	1	1	1	1	1
1307741	78	1	20.2	130	76	77	0	0	0	0	1	0	1	1	0	0	UA	1	5.94	127	125	3.92	66	1.39	23.4	11.5	4.7	5.6	32.8	24.6	34.3	0.7	3.25	1.01	1.97	367.1	78.1	14.3	#NULL!	15.9	11.77	3205	39	1	1	1	1	1	1
1221172	80	1	#NULL!	128	69	56	1	0	0		0	1	1	0	0	1	NSTEMI	1	7.22	94	278	5.58	77.3	#NULL!	#NULL!	10.7	#NULL!	#NULL!	2405.1	#NULL!	33.4	4.28	4.17	0.84	3.2	367.3	199	#NULL!	#NULL!	52.8	#NULL!	15000	31	1	1	1	1	1	1
1211316	75	1	#NULL!	203	108	48	1	1	0		1	1	1	0	0	1	UA	1	6.15	151	157	3.87	62.9	#NULL!	#NULL!	11.5	6.3	#NULL!	18.1	#NULL!	34.6	1.56	3.31	1.18	1.79	367.3	113.7	#NULL!	#NULL!	14.5	#NULL!	704	53	1	1	1	0	1	1
1191357	77	0	26.74	143	78	58	1	0	0		0	0	1	0	0	0	UA	1	5.39	108	208	3.78	69.7	#NULL!	#NULL!	9.7	#NULL!	#NULL!	40.5	#NULL!	36.9	1.32	5.71	1.51	3.75	367.4	85.2	#NULL!	#NULL!	23.4	#NULL!	15.3	54	1	1	1	0	1	0
681117	78	1	23.83	136	84	57	0	1	0		0	0	1	1	0	0	UA	0	4.59	123	123	2.66	57.9	#NULL!	#NULL!	13.1	#NULL!	#NULL!	20.5	#NULL!	36.8	1.41	3.39	1.43	1.7	368.2	92.6	#NULL!	#NULL!	13.3	#NULL!	320.09	58	1	1	1	1	1	0
1033025	84	1	21	169	84	109	1	0	0		1	1	1	1	0	1	UA	1	3.17	134	142	2.27	71.6	#NULL!	#NULL!	11	3.7	#NULL!	12.2	#NULL!	34	0.88	#NULL!	1.28	1.43	368.4	45.6	#NULL!	#NULL!	#NULL!	#NULL!	1.89	#NULL!	0	0	1	1	1	1
1183992	75	1	27.1	132	72	72	0	1	0		0	0	0	0	0	0	UA	1	5.34	117	142	3.39	63.4	#NULL!	#NULL!	9.8	#NULL!	#NULL!	11.5	#NULL!	31.8	1.36	4.71	0.8	3.39	368.6	121.1	#NULL!	#NULL!	#NULL!	#NULL!	134.91	56	1	0	1	1	1	0
1216175	78	1	28.58	180	68	82	1	1	0		1	0	1	0	0	0	UA	1	7.5	119	178	4.74	63.2	#NULL!	#NULL!	10.7	4.7	#NULL!	16.3	#NULL!	34.9	1.65	2.51	0.79	1.37	368.7	96	#NULL!	#NULL!	10.8	#NULL!	543.37	52	1	1	0	1	1	0
1161595	75	0	26.26	149	86	116	1	0	0		1	0	0	0	0	0	STEMI	0	6.11	137	199	4.53	74.1	#NULL!	#NULL!	12.2	#NULL!	#NULL!	19.1	#NULL!	25.4	2.01	5.56	1.28	3.8	368.8	56.2	#NULL!	#NULL!	205.3	#NULL!	658	50	1	1	1	0	1	1
908221	83	1	#NULL!	101	80	98	0	0	0		1	0	1	0	0	1	STEMI	1	14.4	129	96	12.89	89.54	#NULL!	#NULL!	14.6	6.3	#NULL!	39.4	#NULL!	31.4	0.78	3.62	1.23	1.99	368.8	282.6	#NULL!	#NULL!	33.6	#NULL!	23744	#NULL!	1	1	0	1	1	1
1290519	81	1	23.04	159	75	68	0	0	0	0	#NULL!	0	1	1	0	0	UA	1	6.75	118	187	4.46	67.7	1.42	21	10.4	5.22	#NULL!	8.7	13.7	35.8	1.2	3.15	0.83	2.03	369.2	61.3	14.3	55.2	8.2	11.26	1815.49	25	1	0	1	1	1	1
1100608	77	0	20.82	104	51	67	0	0	0		0	1	1	0	0	0	NSTEMI	0	7.55	66	228	5.4	71.5	#NULL!	#NULL!	12.2	#NULL!	#NULL!	14.6	#NULL!	28.7	0.98	2.99	0.53	1.83	369.5	80.1	#NULL!	#NULL!	21.6	#NULL!	3278.09	52	0	1	1	1	1	0
1272186	80	0	26	108	64	84	0	1	0		1	0	1	0	0	0	STEMI	0	8.1	126	196	7.33	90.5	#NULL!	#NULL!	11.4	3.9	#NULL!	76.2	#NULL!	34.5	0.82	5.92	1.69	3.69	370.4	77.4	#NULL!	#NULL!	246	#NULL!	1605.72	55	1	1	1	1	1	1
1055255	83	1	27.18	158	82	78	1	0	0		0	1	1	0	0	0	UA	1	5.98	150	216	4.04	67.6	#NULL!	#NULL!	8.6	#NULL!	#NULL!	27.2	#NULL!	38.8	0.85	3	1.23	1.43	370.4	80.3	#NULL!	#NULL!	13.6	#NULL!	153.11	59	1	1	1	0	1	1
718143	78	0	#NULL!	102	75	68	1	1	0		0	0	0	0	0	0	UA	1	5.61	101	144	3.43	61.1	#NULL!	#NULL!	10.5	7.2	#NULL!	130.4	#NULL!	34.2	0.46	3.23	1.55	0.69	371.9	118.3	#NULL!	#NULL!	11.9	#NULL!	4136.86	27	0	0	0	1	1	1
1239173	82	0	23.37	107	61	67	0	0	0		0	0	1	0	0	0	UA	1	6.02	100	139	3.99	66.3	#NULL!	#NULL!	10.3	4.9	#NULL!	9.1	#NULL!	35.2	0.96	2.51	0.86	1.41	373.3	108	#NULL!	#NULL!	12.8	#NULL!	8765.9	44	1	1	0	1	1	1
960359	77	1	#NULL!	156	90	70	1	1	0		1	1	1	1	0	0	UA	0	9.2	113	157	6.46	70.4	#NULL!	#NULL!	11.5	7.7	#NULL!	20.4	#NULL!	36.7	0.95	3.8	0.78	2.44	373.9	121.9	#NULL!	#NULL!	#NULL!	#NULL!	69	68	1	1	0	1	1	0
1124431	84	1	23.73	168	80	62	1	0	0		0	0	1	0	0	0	UA	1	6.22	136	99	4.06	66.33	#NULL!	#NULL!	12.3	#NULL!	#NULL!	7.1	#NULL!	34.5	1.13	4.66	0.95	3.28	374.2	124.7	#NULL!	#NULL!	12.4	#NULL!	1253	66	0	1	1	1	1	1
1218524	77	1	19.1	189	89	110	1	0	0		0	0	0	0	0	0	NSTEMI	0	7.01	128	208	5.51	78.7	#NULL!	#NULL!	11	4.9	#NULL!	24	#NULL!	34	0.91	4.49	1.15	2.83	374.9	89.3	#NULL!	#NULL!	109.7	#NULL!	22098	39	1	1	1	1	1	1
178189	75	1	23.93	133	78	84	0	0	0		1	0	0	0	0	0	UA	0	3.7	132	63	2.49	67.3	#NULL!	#NULL!	14.9	#NULL!	#NULL!	#NULL!	#NULL!	36.9	#NULL!	2.73	#NULL!	#NULL!	376	77.2	#NULL!	#NULL!	7.5	#NULL!	#NULL!	57	1	1	1	0	1	0
939115	82	1	19.8	130	70	63	1	0	0		1	0	1	0	0	0	UA	1	6	142	179	4.02	67.5	#NULL!	#NULL!	11.8	#NULL!	#NULL!	10.9	#NULL!	40.7	1.67	3.41	0.86	1.85	376.3	94.9	#NULL!	#NULL!	8.5	#NULL!	180	70	0	1	0	1	1	0
855874	79	1	27.92	154	74	110	1	1	0		0	0	1	0	0	0	UA	1	6.36	133	184	5.62	88.2	#NULL!	#NULL!	12.6	6.8	#NULL!	37.2	#NULL!	45.2	4.09	3.9	0.68	2.51	376.6	96	#NULL!	#NULL!	19.5	#NULL!	467	#NULL!	1	1	1	1	1	1
1276069	87	0	#NULL!	114	77	78	1	0	0		0	0	0	1	0	0	UA	1	4.75	96	190	3.24	68.2	#NULL!	#NULL!	10.8	#NULL!	#NULL!	4.9	#NULL!	32.9	1.27	3.92	1.1	2.47	377.2	77.9	#NULL!	#NULL!	5.3	#NULL!	500.67	67	1	1	1	1	0	0
1054182	76	1	25.15	118	72	67	1	1	0	0	1	0	1	0	0	0	UA	0	7.54	128	142	5.96	79	0.71	9.4	14	9.2	7.7	27.1	19.1	38	0.98	3.51	1.02	2.13	377.4	81.3	12	37.6	#NULL!	#NULL!	1013.01	62	1	1	0	0	1	0
1291401	83	1	26.64	119	49	64	1	0	0	0	#NULL!	#NULL!	1	0	0	0	NSTEMI	0	7.78	111	233	5.44	69.9	1.26	16.2	9.7	5.16	#NULL!	30.8	131.8	35.6	1.38	4.72	1.01	2.77	377.6	99.4	14.2	57.1	58.6	1811	4103	55	1	1	1	0	1	1
1250599	81	0	29.76	124	67	85	1	0	0		0	0	0	0	0	0	UA	1	6.7	130	267	5.12	76.5	#NULL!	#NULL!	9.9	#NULL!	#NULL!	12.4	#NULL!	37.2	1.42	3.79	1.03	2.52	377.9	63.2	#NULL!	#NULL!	12.9	#NULL!	103.79	56	1	1	1	1	1	0
1319023	76	0	28	133	65	61	1	1	0	0	0	0	0	1	0	0	UA	0	9.03	112	227	6.15	68.2	2.35	26	11.2	6.6	6.7	11.4	16.5	33.2	1.02	3.48	1.11	1.96	378	90.7	13.6	40.7	9.9	12.13	784.43	58	1	0	1	1	1	0
1274668	82	1	18.37	128	76	70	0	0	0		0	0	0	0	0	0	UA	0	5.27	122	131	3.63	68.8	#NULL!	#NULL!	13	#NULL!	#NULL!	54.7	#NULL!	34.8	0.78	3.63	1.57	1.76	378.7	72.4	#NULL!	#NULL!	12.2	#NULL!	250.32	58	1	1	0	1	1	0
681261	79	1	23.05	128	70	71	1	1	0		1	0	0	1	0	0	UA	1	14.17	129	352	10.62	75	#NULL!	#NULL!	9.2	7.7	#NULL!	21.8	#NULL!	33.7	2.66	3.16	0.58	1.5	379.3	238.3	#NULL!	#NULL!	3.9	#NULL!	2385	64	1	1	0	1	1	1
1035689	81	0	#NULL!	103	73	78	1	0	0		0	0	1	0	0	0	NSTEMI	1	8.39	124	116	6.54	77.9	#NULL!	#NULL!	13.2	4.4	#NULL!	50.5	#NULL!	41.1	1.48	3	1.01	1.26	380.6	84.8	#NULL!	#NULL!	14.2	#NULL!	18202	62	0	1	0	1	1	0
1086895	75	1	24.38	156	81	66	1	0	#NULL!		1	1	1	0	0	0	UA	1	6.52	114	147	4.84	73.1	#NULL!	#NULL!	11.8	#NULL!	#NULL!	9.9	#NULL!	35.9	1.67	2.94	0.95	1.59	382.1	115.9	#NULL!	#NULL!	8.7	#NULL!	323.12	51	1	1	0	1	1	0
1024287	78	0	#NULL!	115	64	78	0	0	0		0	0	0	0	0	0	STEMI	0	5.06	#NULL!	209	2.51	49.5	#NULL!	#NULL!	10.2	#NULL!	#NULL!	#NULL!	#NULL!	38.3	#NULL!	4.14	#NULL!	#NULL!	382.3	#NULL!	#NULL!	#NULL!	#NULL!	#NULL!	#NULL!	#NULL!	1	1	1	1	1	0
1372359	80	1	#NULL!	115	75	116	0	0	1	1	1	0	0	0	0	0	STEMI	1	19.18	160	126	16.01	83.5	1.81	9.4	11.9	#NULL!	6	192.2	449.8	31.5	1.5	3.39	0.69	2	382.6	135.6	16	44.7	166.8	#NULL!	12185	18	1	0	1	1	1	1
1371681	79	1	33.2	171	100	74	1	0	0	0	1	0	0	0	0	0	UA	0	7.85	145	288	4.97	63.3	2.41	30.7	9.5	4.7	#NULL!	10.7	16.6	35.1	0.82	3.3	0.67	2.19	382.7	77.4	15.3	39.3	17.6	#NULL!	158.44	60	1	1	0	0	1	1
1231719	75	0	22.07	170	86	70	1	0	0		0	0	1	0	0	0	UA	1	4.46	106	145	2.89	64.8	#NULL!	#NULL!	12.4	4.9	#NULL!	33.3	#NULL!	33.2	1.07	3.39	1.24	1.92	383.2	99.8	#NULL!	#NULL!	15.8	#NULL!	#NULL!	55	1	1	1	1	1	0
1347860	78	0	22.2	152	83	108	1	0	0	0	0	0	0	0	0	0	UA	0	9.28	117	226	7.03	75.7	1.58	17	10.3	5.6	#NULL!	18.8	26.1	35.9	1.75	5.24	1.25	3.18	383.3	166.5	11.1	28.5	21.2	24.07	227.3	65	1	1	1	1	1	1
424339	76	1	#NULL!	151	73	56	1	0	0		1	0	1	0	0	0	UA	0	6.2	157	137	3.77	60.5	#NULL!	#NULL!	11.1	#NULL!	#NULL!	26.3	#NULL!	37.9	3.55	5.11	0.85	2.82	383.8	#NULL!	#NULL!	#NULL!	10.4	#NULL!	45	59	1	1	1	1	1	0
1080989	76	1	19	109	60	60	0	0	0		1	0	1	0	0	0	UA	0	6.19	131	#NULL!	3.87	62.5	#NULL!	#NULL!	11.3	#NULL!	#NULL!	16.4	#NULL!	39.9	1.83	4.79	1.28	3.16	384.2	82.5	#NULL!	#NULL!	12.4	#NULL!	2.8	66	1	1	1	1	1	0
1206216	79	1	17.899	119	93	106	0	0	0		1	0	1	0	0	0	UA	1	6.07	131	93	4.16	68.5	#NULL!	#NULL!	12.7	#NULL!	#NULL!	132.7	#NULL!	31.2	0.75	2.66	0.88	1.42	384.2	73.6	#NULL!	#NULL!	12.1	#NULL!	4924	35	1	0	0	1	1	1
1270468	75	0	23.4	122	65	79	1	1	0		0	0	0	0	0	0	STEMI	0	9.88	85	264	8.91	90.2	#NULL!	#NULL!	11.2	4.1	#NULL!	38.6	#NULL!	31.2	1.36	5.08	1.23	3.05	384.3	85.3	#NULL!	#NULL!	65.7	#NULL!	894.82	60	1	1	1	1	1	1
1133301	76	1	22.86	134	71	80	1	0	0		1	0	1	1	0	0	NSTEMI	1	5.22	136	243	3.63	69.6	#NULL!	#NULL!	9.5	#NULL!	#NULL!	14.8	#NULL!	41	0.86	#NULL!	1.11	2.41	386	68.6	#NULL!	#NULL!	10.6	#NULL!	#NULL!	62	1	1	1	1	1	0
1238470	75	1	25.07	160	102	115	1	0	0		0	0	1	0	0	0	UA	0	7.49	133	210	5.53	73.9	#NULL!	#NULL!	10.1	#NULL!	#NULL!	#NULL!	#NULL!	35.8	2.35	4.2	0.8	2.91	386.5	149.7	#NULL!	#NULL!	10.6	#NULL!	1271.31	55	1	1	0	0	1	0
1169174	75	1	19.95	120	55	58	1	0	0		1	1	0	0	0	0	STEMI	0	8.9	108	287	5.26	59.1	#NULL!	#NULL!	11.5	4.3	#NULL!	49.2	#NULL!	28.1	1.49	4.08	0.85	2.76	387.5	96.6	#NULL!	#NULL!	432.3	#NULL!	2801.6	64	1	1	0	0	1	0
555723	79	0	#NULL!	154	74	84	1	0	0		#NULL!	0	1	0	0	0	UA	0	5.8	134	144	4.3	73.6	#NULL!	#NULL!	12	#NULL!	#NULL!	10.9	#NULL!	37.6	0.93	3.33	1.01	1.85	387.6	77.1	#NULL!	#NULL!	65.4	#NULL!	312	54	1	1	1	1	1	0
932076	76	1	#NULL!	116	62	62	1	0	0		0	0	0	0	0	0	UA	1	8.4	126	56	3.75	44.7	#NULL!	#NULL!	11.5	#NULL!	#NULL!	27.1	#NULL!	30.9	0.93	3.68	0.98	2.58	387.7	123.2	#NULL!	#NULL!	11.1	#NULL!	836	65	1	1	0	0	1	1
1061221	76	1	22.49	118	68	63	0	1	0		1	0	1	0	0	0	STEMI	1	6.57	147	153	4.12	62.7	#NULL!	#NULL!	12.6	6.2	#NULL!	54.6	#NULL!	44.5	1.25	2.62	0.7	1.6	388.3	76.7	#NULL!	#NULL!	19.3	#NULL!	476	66	1	1	0	1	1	0
1042774	76	1	#NULL!	117	70	62	0	1	0		1	0	1	0	0	0	STEMI	1	7.66	150	186	5.67	73.9	#NULL!	#NULL!	13.9	6.8	#NULL!	18.5	#NULL!	38.2	1.7	4.3	0.97	2.92	388.7	113.7	#NULL!	#NULL!	11.1	#NULL!	475	50	1	1	1	0	1	1
979300	91	0	21	95	65	92	1	1	0	0	0	0	0	0	0	1	UA	1	4.67	112	148	3.5	74.8	0.68	14.5	8.8	6.51	6.3	5	19.2	30.1	0.88	2.99	0.91	1.64	388.9	101	13.7	#NULL!	10.4	18.63	1687	50	1	1	1	1	1	1
1269970	75	0	24.44	167	79	53	1	0	0		0	0	1	0	0	0	UA	0	4.01	116	154	2.27	56.7	#NULL!	#NULL!	11.3	#NULL!	#NULL!	15.1	#NULL!	44.5	4.85	6.56	1.28	4.45	390.2	57.9	#NULL!	#NULL!	46.9	#NULL!	677.46	64	1	1	1	0	1	0
883590	77	1	#NULL!	134	56	50	1	0	0		1	0	1	0	0	0	UA	1	4.92	123	213	3.38	68.8	#NULL!	#NULL!	8.4	#NULL!	#NULL!	66.6	#NULL!	37.3	2.54	4.58	0.99	3	390.7	87.9	#NULL!	#NULL!	9.1	#NULL!	1479.87	58	0	1	0	0	1	0
419713	82	1	#NULL!	154	76	82	1	1	0		1	0	1	1	1	1	UA	1	7.26	113	133	5.5	75.8	#NULL!	#NULL!	11.5	#NULL!	#NULL!	8.5	#NULL!	36.8	0.72	2.94	0.62	1.26	391.1	91.3	#NULL!	#NULL!	13.6	#NULL!	2227.71	48	0	0	1	1	1	1
1045904	78	1	#NULL!	166	86	65	1	0	0		1	0	1	0	0	0	UA	0	5.88	128	188	3.73	63.5	#NULL!	#NULL!	11.2	#NULL!	#NULL!	7.2	#NULL!	31.3	1.49	#NULL!	1.02	3.86	392	102.8	#NULL!	#NULL!	12.1	#NULL!	2524.41	30	1	1	0	0	1	0
1079730	78	0	26.6	136	78	64	1	0	0		0	0	1	0	0	0	UA	0	5.52	126	212	3.21	58.1	#NULL!	#NULL!	10.3	#NULL!	#NULL!	10.2	#NULL!	40.7	1.83	3.32	1.08	1.91	392.2	83.5	#NULL!	#NULL!	9.6	#NULL!	194.48	58	0	1	0	0	1	0
1201590	82	1	21.61	119	66	53	1	0	0		1	0	1	1	0	0	UA	1	6.35	118	128	4.68	73.7	#NULL!	#NULL!	11.8	#NULL!	#NULL!	16.1	#NULL!	37.4	2.2	3.45	0.73	2.22	392.7	138.1	#NULL!	#NULL!	34.2	#NULL!	#NULL!	47	0	1	0	1	1	0
#NULL!	83	1	20.76	178	90	64	1	0	0		1	1	1	1	0	0	UA	0	5.42	92	85	3.8	70.1	#NULL!	#NULL!	12.1	4.6	#NULL!	20.7	#NULL!	33.6	0.53	3.23	1.3	1.42	392.9	129.9	#NULL!	#NULL!	9.7	#NULL!	#NULL!	48	1	1	1	0	1	1
1153524	81	0	18.22	118	80	68	1	0	0		0	0	0	0	0	0	UA	0	3.68	122	130	2.09	56.8	#NULL!	#NULL!	11	5.5	#NULL!	6.1	#NULL!	39.7	1.44	4.37	1.31	3.12	393.5	57.5	#NULL!	#NULL!	9.1	#NULL!	197.69	54	1	1	0	1	1	0
1134948	77	1	#NULL!	119	75	54	1	0	0		1	1	0	0	0	0	UA	1	7.96	169	212	7.22	90.8	#NULL!	#NULL!	12	4.3	#NULL!	33.7	#NULL!	36.5	1.4	5.55	2.12	3.05	393.7	87.6	#NULL!	#NULL!	14.5	#NULL!	507.74	55	1	1	1	1	1	0
983635	80	1	#NULL!	128	63	60	1	1	0		0	0	1	0	0	0	UA	0	8.1	122	139	6.16	76.1	#NULL!	#NULL!	11.8	#NULL!	#NULL!	10.7	#NULL!	35.9	0.99	3.15	0.92	2.08	394.1	112	#NULL!	#NULL!	10.8	#NULL!	101	68	1	0	1	0	1	0
1290746	82	1	29.4	162	82	67	1	0	0	0	0	0	0	0	0	0	UA	1	0.83	146	182	4.79	66.9	1.85	25.8	11.5	4.65	5.7	28.7	19.7	38.4	1.11	3.26	0.72	2.2	394.3	83.1	14	42.1	13.6	#NULL!	#NULL!	#NULL!	1	1	1	1	1	0
1328922	80	1	#NULL!	138	110	135	0	1	1	0	#NULL!	0	1	1	0	1	NSTEMI	1	22.05	116	217	19.92	90.4	1.09	4.9	11.1	9.66	10.4	80.7	562	28.5	0.96	3.18	0.99	1.72	395	254.3	16	#NULL!	299.7	#NULL!	#NULL!	#NULL!	1	1	0	0	1	1
1178900	75	0	#NULL!	157	71	40	1	1	0		0	0	1	0	0	0	UA	1	9.97	116	216	7.89	79.21	#NULL!	#NULL!	12.9	10.9	#NULL!	51.4	#NULL!	36.5	1.97	4.3	0.9	2.76	396.3	96	#NULL!	#NULL!	13.9	#NULL!	2716	58	0	1	1	0	1	1
1368840	79	0	#NULL!	131	74	97	1	0	1	0	0	0	1	0	0	1	STEMI	1	11.5	120	261	9.76	84.9	0.97	8.4	10.5	#NULL!	#NULL!	52.5	358	31.9	1.41	4.42	1.04	2.8	397.4	84.4	12.4	40.1	172.1	5279	3946.2	41	1	1	1	1	1	1
1098594	83	1	21.48	140	87	70	1	0	0		0	1	1	0	0	0	UA	1	9.79	120	183	7.2	73.6	#NULL!	#NULL!	11.6	#NULL!	#NULL!	36.6	#NULL!	38.6	1.02	#NULL!	1.17	1.69	397.4	98.2	#NULL!	#NULL!	#NULL!	#NULL!	764.32	#NULL!	1	1	1	0	1	1
893905	79	0	21.93	122	82	62	1	0	0	0	0	0	1	1	0	0	UA	1	6.69	106	150	3.76	56.3	2.43	36.3	12.9	#NULL!	#NULL!	6.9	21.7	40.5	1.49	5.72	1.39	4.08	397.5	123.2	12.6	29.8	12.7	#NULL!	347.3	60	1	0	1	0	1	1
1281105	76	0	25.1	102	66	78	0	0	0	0	0	0	0	0	0	1	UA	1	5.33	118	164	3.3	62	1.42	26.6	10.8	5.99	#NULL!	67.1	71.3	39.2	0.55	2.68	0.69	1.67	397.6	65.2	14.9	35	23.1	25.02	8612	30	1	1	1	0	1	1
1151996	84	0	24.2	144	73	68	1	1	0		0	1	0	0	0	0	NSTEMI	1	9.82	108	193	8	81.5	#NULL!	#NULL!	#NULL!	7.9	#NULL!	17.4	#NULL!	40.3	1.41	3.97	1.22	2.52	397.9	72.6	#NULL!	#NULL!	20.8	#NULL!	4082	47	1	1	1	1	1	1
1142797	77	0	21	150	70	70	1	0	0		0	0	1	0	0	0	STEMI	0	5.43	112	249	3.95	72.8	#NULL!	#NULL!	10.8	#NULL!	#NULL!	14	#NULL!	39.2	1.23	4.5	1.26	2.74	398.4	3.86	#NULL!	#NULL!	7.8	#NULL!	1698.56	44	1	1	1	1	1	0
1028766	76	0	31.2	150	80	87	1	1	0		1	0	1	0	0	1	UA	1	14.67	104	194	12.29	83.7	#NULL!	#NULL!	11	#NULL!	#NULL!	11.2	#NULL!	35.3	1.99	3.86	1.12	1.97	399.2	235.2	#NULL!	#NULL!	14.3	#NULL!	2550	0.5	1	1	1	0	1	1
1368504	79	0	#NULL!	99	58	66	0	0	0	0	0	0	1	0	0	0	UA	1	4.39	118	143	2.58	58.9	1.49	33.9	11.7	#NULL!	#NULL!	26.5	25.9	34.1	1.04	4	1.13	2.46	399.3	63.3	13.7	34.6	11	165.6	7402.68	45	1	1	0	1	1	1
1320152	77	0	#NULL!	143	63	63	1	0	0	0	0	0	0	0	0	0	UA	0	4.95	119	168	2.95	59.6	1.41	28.5	12.1	#NULL!	5.7	23.9	22.2	39.2	1.31	3.33	1.25	1.54	399.3	72.4	13.1	#NULL!	29.1	5.55	240.2	59	1	0	1	1	1	0
1166313	76	1	21.3	170	75	74	1	0	0		0	1	1	0	0	0	UA	1	8.12	125	300	5.38	66	#NULL!	#NULL!	9.6	#NULL!	#NULL!	11.2	#NULL!	34.8	1.7	4.58	0.89	3.31	399.3	107.4	#NULL!	#NULL!	10.1	#NULL!	708.47	51	1	1	1	1	1	1
#NULL!	80	1	20.8	146	71	68	1	0	0		0	0	0	0	0	0	UA	0	8.03	146	143	5.66	70.4	#NULL!	#NULL!	12.1	#NULL!	#NULL!	34.7	#NULL!	36.2	0.76	2.07	0.91	0.45	400.3	93.1	#NULL!	#NULL!	13.6	#NULL!	597.53	65	0	1	1	0	1	0
1309620	76	1	#NULL!	86	61	58	1	0	0	0	1	0	1	1	0	0	STEMI	0	12.5	114	143	9.07	72.5	1.42	11.4	12.2	#NULL!	#NULL!	39.6	157.5	31.7	0.8	3.29	0.98	1.87	400.3	111.3	13.4	33.4	61.6	14.36	4653.32	51	1	1	1	0	1	0
939507	75	1	#NULL!	114	67	60	0	1	0		0	0	0	0	0	0	NSTEMI	1	4.3	159	146	2.98	69.6	#NULL!	#NULL!	10.1	5.7	#NULL!	45.5	#NULL!	36.2	1.58	3.45	0.67	2.33	400.7	99.7	#NULL!	#NULL!	12	#NULL!	699	60	1	1	0	1	1	0
966938	76	0	21.87	165	75	60	1	0	0	0	0	0	0	1	0	0	UA	0	4.89	124	109	2.42	49.5	1.99	40.7	12.8	4.59	#NULL!	20.8	25.4	39	1.16	3.63	1.08	2.07	400.9	62.7	12	#NULL!	12.2	4.62	1569.45	62	0	1	1	1	1	0
1276380	82	0	24.9	120	53	86	1	1	0		0	0	1	0	0	0	UA	1	6.89	65	210	5.35	77.7	#NULL!	#NULL!	11.5	6.9	#NULL!	15.6	#NULL!	28.9	1.6	3.63	0.83	2.43	401	124.5	#NULL!	#NULL!	8.7	#NULL!	1914.32	62	0	1	1	1	1	1
1099746	76	1	21.2	124	88	80	1	0	0		0	1	1	1	1	0	UA	0	6.07	68	129	3.91	64.4	#NULL!	#NULL!	13.4	#NULL!	#NULL!	#NULL!	#NULL!	32.5	0	2.76	0.63	1.31	401	343.2	#NULL!	#NULL!	9	#NULL!	9447	46	1	1	0	1	1	1
910291	87	1	#NULL!	170	70	52	1	0	0		1	0	1	0	0	0	STEMI	1	11.5	114	125	9.42	82.1	#NULL!	#NULL!	10.8	5.8	#NULL!	#NULL!	#NULL!	33.2	0.86	4.2	1.13	2.58	401.3	131.1	#NULL!	#NULL!	17.2	#NULL!	1201	60	1	1	0	0	1	1
1212085	78	1	24.39	154	79	68	1	0	0		0	0	1	1	0	0	UA	1	6.08	135	147	4.13	67.9	#NULL!	#NULL!	9.2	6	#NULL!	16.4	#NULL!	36	0.67	3.29	1.55	1.38	401.6	77.1	#NULL!	#NULL!	11.1	#NULL!	146.31	#NULL!	1	1	1	1	1	0
1294725	77	1	21.48	183	72	54	1	0	0	0	1	0	0	0	0	0	STEMI	0	6.01	121	237	4.46	74.2	1.16	19.3	12.1	4.49	#NULL!	14.6	20.2	32.9	1.7	2.98	0.9	1.66	401.8	88.8	13.7	40.7	15.5	12.73	9641	53	1	1	1	1	1	1
1154524	77	1	20.2	143	64	45	0	0	0		1	0	1	0	0	0	STEMI	1	5.44	118	205	3.49	64.2	#NULL!	#NULL!	11.2	#NULL!	#NULL!	116	#NULL!	37.8	1.04	4.09	1.44	2.38	401.9	78	#NULL!	#NULL!	11.5	#NULL!	59	57	1	1	0	0	1	0
1208799	78	1	22.03	152	98	70	1	0	0		0	0	1	0	0	0	STEMI	0	5.68	120	124	3.31	58.4	#NULL!	#NULL!	9.5	#NULL!	#NULL!	56	#NULL!	36.9	1.08	5.47	1.82	3.07	401.9	116.6	#NULL!	#NULL!	10.2	#NULL!	7701	50	1	1	1	1	1	0
1319023	76	0	28	136	69	76	1	1	1	0	0	0	1	0	0	0	NSTEMI	0	7.34	98	273	5.18	70.5	1.56	21.3	12.7	#NULL!	6.7	6	7.5	30	0.73	2.97	0.99	1.54	402.2	106.3	13.4	50.5	21.3	43.76	834.2	59	1	0	1	1	1	0
1102127	76	1	20.94	150	86	89	1	0	0		1	0	1	0	0	0	UA	0	8.16	107	179	6.48	79.3	#NULL!	#NULL!	12.3	#NULL!	#NULL!	10.4	#NULL!	35.5	0.78	3.2	1.06	1.82	402.5	101.2	#NULL!	#NULL!	12.5	#NULL!	400.11	60	0	1	0	0	1	0
1360838	76	1	27.73	156	75	82	1	0	1	1	0	0	1	1	0	0	UA	1	6.14	112	195	4.46	72.7	1.01	16.4	11.4	5.6	#NULL!	37.5	23.5	41.2	5.76	5.49	0.9	3.71	403.5	91.2	10.6	34.8	13.6	11.42	549.62	53	1	1	1	1	1	1
1221454	84	1	26.3	173	60	48	1	0	0		0	0	1	0	0	0	UA	0	6.83	143	212	5.2	76.1	#NULL!	#NULL!	10.7	#NULL!	#NULL!	16.7	#NULL!	35.3	1.14	3.54	0.96	2.19	403.8	76	#NULL!	#NULL!	13.1	#NULL!	1396.38	55	1	1	1	0	1	0
1129370	85	1	22.39	113	53	80	1	0	0		0	0	0	0	0	0	NSTEMI	1	2.72	57	120	2	73.5	#NULL!	#NULL!	11.7	#NULL!	#NULL!	21.1	#NULL!	32.7	1.59	3.03	0.6	1.98	403.9	105.9	#NULL!	#NULL!	14.6	#NULL!	3003.6	56	0	0	1	1	0	1
1131616	80	1	#NULL!	119	70	55	1	0	0		1	0	0	0	0	0	STEMI	0	6.89	125	174	5.09	73.9	#NULL!	#NULL!	10.5	#NULL!	#NULL!	35.5	#NULL!	37.7	0.48	5.42	1.52	3.69	403.9	69.1	#NULL!	#NULL!	429.1	#NULL!	99	40	1	1	0	0	1	0
536080	81	1	#NULL!	140	82	62	1	1	0		1	0	1	1	0	0	STEMI	0	#NULL!	100	#NULL!	#NULL!	#NULL!	#NULL!	#NULL!	#NULL!	5.1	#NULL!	#NULL!	#NULL!	#NULL!	1.38	#NULL!	1.14	2	404.3	157.8	#NULL!	#NULL!	#NULL!	#NULL!	4542.47	50	1	1	1	1	1	1
980241	76	0	26.036	158	76	77	1	1	0		0	1	0	0	0	0	UA	1	9.14	126	389	5.88	64.4	#NULL!	#NULL!	10.5	6.9	#NULL!	21.1	#NULL!	28.8	1.46	#NULL!	1.66	3.78	405.3	82.5	#NULL!	#NULL!	14.6	#NULL!	46	56	0	1	1	0	1	1
1374741	83	0	#NULL!	165	107	89	1	0	1	0	0	0	1	0	0	1	STEMI	1	23.94	135	420	22.96	95.9	0.44	1.8	10.7	#NULL!	#NULL!	36	36.8	35.1	1.35	4.98	2.25	1.91	405.3	67.3	11.5	21.4	24.1	#NULL!	10837.5	42	0	1	0	0	1	1
1123572	84	0	19.63	126	80	70	0	0	0		0	0	0	0	0	0	NSTEMI	0	5.19	95	135	4.01	77.2	#NULL!	#NULL!	#NULL!	#NULL!	#NULL!	11.1	#NULL!	29.5	0.66	4.24	1.2	2.86	405.6	58.3	#NULL!	#NULL!	11.2	#NULL!	5537.18	66	1	1	0	1	1	1
1295266	80	0	22.27	123	61	75	1	1	0	0	0	0	0	0	0	0	STEMI	0	6.43	94	209	5.41	84.1	0.51	7.9	10.3	5	#NULL!	16	22.9	34.9	1.07	3.34	1.1	1.83	405.8	71.6	12.8	#NULL!	14.9	#NULL!	945.79	56	1	1	1	1	1	0
12205085	80	1	28.57	110	66	82	0	1	0		0	0	0	0	0	0	STEMI	1	8	107	216	6.71	83.8	#NULL!	#NULL!	10.7	8.5	#NULL!	113.3	#NULL!	28	1.25	4.18	0.7	2.96	405.9	87.2	#NULL!	#NULL!	14.3	#NULL!	13567	52	1	1	0	0	1	1
1040444	76	1	26.98	120	70	80	1	1	0		1	0	1	0	0	0	UA	0	5.84	128	144	3.87	66.2	#NULL!	#NULL!	#NULL!	7.8	#NULL!	33.4	#NULL!	34.2	9.29	6.16	0.92	1.1	406.4	129.2	#NULL!	#NULL!	8.2	#NULL!	594	51	1	1	1	1	1	0
1323405	75	1	23.8	123	76	90	0	1	0	0	1	0	0	0	0	0	STEMI	0	6.28	126	143	4.6	73.1	1.21	19.3	11.2	5.76	6.4	12.8	14.9	36.6	0.78	3.32	0.75	2.05	407.2	76.9	13.1	#NULL!	8.8	#NULL!	7679.87	44	1	1	1	1	1	1
1310819	82	1	21.13	157	70	89	1	0	0	0	0	0	0	0	0	0	UA	1	3.62	52	63	2.77	76.5	0.53	14.6	#NULL!	4.6	#NULL!	4.2	11.5	26	0.75	3.06	1.13	1.6	407.8	480.7	12.9	38.1	8.9	#NULL!	4824.88	33	1	1	0	1	1	1
1203107	79	1	#NULL!	108	68	92	0	0	0		1	0	0	0	0	0	STEMI	1	7.2	91	230	5.37	74.5	#NULL!	#NULL!	9.5	#NULL!	#NULL!	8.9	#NULL!	26.9	1.55	4.71	0.75	3.48	408.3	285.1	#NULL!	#NULL!	9.3	#NULL!	7182.21	30	1	1	1	1	1	1
959490	86	1	#NULL!	183	83	61	1	0	0	0	1	1	1	0	0	0	STEMI	0	8.51	128	261	6.2	72.9	1.86	21.9	9.6	14.32	5.8	15.4	37.4	31.6	1.72	4.4	1.08	2.46	408.6	89.7	13.8	51	36	1947	612.3	50	1	0	1	1	1	0
971116	81	0	#NULL!	190	90	80	1	1	0		#NULL!	#NULL!	#NULL!	#NULL!	#NULL!	#NULL!	UA	0	#NULL!	#NULL!	#NULL!	#NULL!	#NULL!	#NULL!	#NULL!	#NULL!	#NULL!	#NULL!	#NULL!	#NULL!	#NULL!	#NULL!	#NULL!	0.75	#NULL!	408.8	#NULL!	#NULL!	#NULL!	#NULL!	#NULL!	4326	61	1	1	0	1	1	#NULL!
943357	77	1	#NULL!	141	75	80	1	0	0		0	0	0	0	0	0	STEMI	0	6.9	135	173	4.21	61	#NULL!	#NULL!	9.4	#NULL!	#NULL!	73.6	#NULL!	38.5	1.05	2.54	0.82	1.15	409.3	142.5	#NULL!	#NULL!	4.6	#NULL!	394	68	1	1	0	1	1	0
1322084	84	1	23.88	134	74	90	1	0	0	0	0	0	1	1	0	0	UA	1	5.26	172	174	2.41	45.8	2.38	45.2	10.4	5.7	5.9	34.4	18.4	38.9	5.81	4.21	0.73	2.56	409.6	89.6	#NULL!	#NULL!	28.5	#NULL!	174.09	73	1	1	1	1	1	0
1252024	77	0	21.8	122	74	74	1	0	0		0	0	1	0	0	0	NSTEMI	0	4.81	66	226	3.2	66.5	#NULL!	#NULL!	9.8	#NULL!	#NULL!	#NULL!	#NULL!	37.3	4.86	3.68	0.63	2.44	409.9	70.5	#NULL!	#NULL!	19.6	#NULL!	9470.45	48	1	1	1	1	1	0
1211656	79	0	26.6	146	77	70	1	1	0		0	0	0	1	0	0	UA	1	4.86	139	179	2.67	55	#NULL!	#NULL!	11.1	5.9	#NULL!	19.4	#NULL!	44.7	1.22	3.34	1.61	1.38	410.6	86.9	#NULL!	#NULL!	37.6	#NULL!	972.26	41	1	0	1	1	1	1
981284	76	1	#NULL!	117	74	93	1	0	0		1	0	1	0	0	0	STEMI	0	6.8	155	125	5.25	76.8	#NULL!	#NULL!	10.1	#NULL!	#NULL!	25.3	#NULL!	35.9	2.47	4.3	0.98	2.29	410.6	77.8	#NULL!	#NULL!	99.1	#NULL!	#NULL!	50	1	1	0	1	1	0
1259185	77	1	23.8	101	66	70	1	0	0		0	0	1	0	0	1	NSTEMI	0	10.1	141	142	7.71	76.4	#NULL!	#NULL!	12.7	#NULL!	#NULL!	20.3	#NULL!	33.3	1.46	#NULL!	0.95	2.9	410.7	107.9	#NULL!	#NULL!	58.2	#NULL!	2351.05	53	1	1	1	0	1	0
1334439	80	1	22.79	134	96	87	0	0	0	0	0	1	0	0	0	0	UA	0	5.3	130	148	4.08	77	0.88	16.6	10.6	#NULL!	#NULL!	8.6	16.2	41.1	1.21	4.55	1.07	3.09	411.2	79.1	11	28.5	14	#NULL!	220.51	54	1	0	0	0	1	0
1287534	75	1	#NULL!	165	59	56	1	0	0	0	1	0	1	1	0	0	UA	0	4.64	144	138	23.91	62.8	1.28	27.6	12.5	#NULL!	#NULL!	18.4	23.8	34.7	1.25	3.26	1.03	1.79	411.9	97.1	#NULL!	37.7	25.5	#NULL!	360	59	1	1	0	1	1	0
588326	81	0	#NULL!	104	62	54	1	0	0		1	1	0	0	0	0	STEMI	0	6	113	81	4.75	79.3	#NULL!	#NULL!	12.2	4.1	#NULL!	37.9	#NULL!	27.6	0.87	3.64	1.16	2.2	412.7	71.1	#NULL!	#NULL!	33.7	#NULL!	4981	59	1	1	0	0	1	0
528084	78	1	25.26	118	65	75	1	0	0		0	0	1	1	0	1	UA	0	5.75	115	215	4.53	78.8	#NULL!	#NULL!	9.2	#NULL!	#NULL!	#NULL!	#NULL!	#NULL!	1.37	2.4	0.77	1.14	413.3	157.3	#NULL!	#NULL!	#NULL!	#NULL!	349.27	31	1	1	1	1	1	0
1039892	78	1	22.05	146	51	54	1	0	0		0	0	1	1	0	0	NSTEMI	0	6.2	113	216	4.62	74.5	#NULL!	#NULL!	10.7	7.8	#NULL!	24.6	#NULL!	38.8	0.88	2.86	0.98	1.11	413.6	100.9	#NULL!	#NULL!	13.7	#NULL!	2176.01	47	1	1	0	1	1	1
1127705	76	1	21.85	130	59	76	1	1	0		1	0	0	0	0	0	UA	0	5.35	122	255	4.13	77.2	#NULL!	#NULL!	10	5.1	#NULL!	22.3	#NULL!	32.9	1.75	2.78	0.8	1.59	414.4	93.3	#NULL!	#NULL!	74.5	#NULL!	3952	52	1	1	0	1	0	0
1239331	77	1	23.51	116	81	78	1	1	0		0	0	0	0	0	0	UA	0	6.74	132	89	4.13	61.2	#NULL!	#NULL!	11.5	6.3	#NULL!	11.7	#NULL!	35.1	3.25	4.01	0.76	2.82	415.1	105.8	#NULL!	#NULL!	13	#NULL!	639.11	63	1	1	0	1	1	0
1161306	76	1	20.43	124	65	83	1	0	0		1	0	0	0	0	0	NSTEMI	0	12.7	105	124	10.89	85.7	#NULL!	#NULL!	12.6	#NULL!	#NULL!	34.7	#NULL!	26.7	#NULL!	#NULL!	#NULL!	#NULL!	415.6	128.5	#NULL!	#NULL!	13.5	#NULL!	1408	#NULL!	1	0	1	1	1	0
1188370	84	1	30	141	73	76	1	0	0		0	0	1	0	0	0	UA	1	6.15	137	121	3.85	62.6	#NULL!	#NULL!	12.5	#NULL!	#NULL!	18.9	#NULL!	42.4	1.81	4.33	0.88	2.95	416.8	88.9	#NULL!	#NULL!	9.4	#NULL!	1229	58	1	1	0	1	1	0
#NULL!	75	0	#NULL!	113	71	60	1	0	0		0	0	1	0	0	0	UA	0	6.02	111	162	4.93	81.9	#NULL!	#NULL!	10.2	#NULL!	#NULL!	11.5	#NULL!	39.1	0.54	3.9	1.51	2.2	417.2	63.9	#NULL!	#NULL!	13.4	#NULL!	159.7	65	0	0	0	1	1	0
1275481	76	0	24.65	99	69	70	1	1	0		0	0	1	0	0	0	STEMI	1	12.86	108	230	11.77	91.5	#NULL!	#NULL!	11.4	5.4	#NULL!	72.1	#NULL!	29.2	1.39	4.28	0.2	2.75	417.9	105.9	#NULL!	#NULL!	240.9	#NULL!	2984.34	56	1	1	1	1	1	0
863656	78	1	#NULL!	135	68	87	1	1	0		1	0	1	1	0	0	UA	1	5.8	126	131	4.04	70	#NULL!	#NULL!	8.7	3.7	#NULL!	10.2	#NULL!	37.2	1.22	2.84	1.14	1.4	419	87.8	#NULL!	#NULL!	#NULL!	#NULL!	634	69	1	1	1	1	1	0
893220	77	0	21.7	139	64	92	0	1	0		0	1	1	0	0	0	UA	1	7.72	115	275	5.19	67.2	#NULL!	#NULL!	9	6.8	#NULL!	40.2	#NULL!	31.4	2.09	6.01	1.42	3.92	419.8	141.5	#NULL!	#NULL!	9.9	#NULL!	12.78	#NULL!	1	1	0	1	1	0
1007962	76	1	#NULL!	96	62	74	0	0	0		0	0	0	0	0	0	STEMI	0	7.5	148	181	4.71	62.9	#NULL!	#NULL!	8.5	5.2	#NULL!	99.3	#NULL!	37	1.42	3.55	0.88	2.1	420	82.1	#NULL!	#NULL!	11.1	#NULL!	1713	65	1	1	1	1	1	0
1336908	76	0	21.42	142	72	82	1	1	0	0	0	0	1	0	0	0	UA	1	4.81	89	162	3.14	65.3	1.13	23.5	11.6	5.24	8.6	19.4	26.6	35.8	2.11	2.44	0.57	1.45	420.2	116.1	13.2	42.1	9.1	30.62	361.62	62	1	1	1	1	1	0
1106919	78	1	#NULL!	120	71	80	0	0	0		1	0	0	0	0	0	NSTEMI	0	7.69	113	309	4.96	64.6	#NULL!	#NULL!	11.4	#NULL!	#NULL!	44	#NULL!	32	2.2	4.07	0.64	2.31	420.8	85.2	#NULL!	#NULL!	15.1	#NULL!	2728.21	58	1	1	1	1	1	1
1314722	80	0	26.56	172	83	66	1	0	0	0	0	0	1	0	0	0	STEMI	0	7.01	112	199	4.58	65.4	1.67	23.8	11.6	#NULL!	5.7	13.4	22.8	35.6	1.12	3.25	0.97	1.79	420.9	61.6	#NULL!	#NULL!	11.2	#NULL!	2294.09	56	1	1	1	0	1	0
876053	78	0	24.46	164	78	70	1	0	0		0	0	0	1	0	0	UA	0	6.46	122	188	3.49	63.9	#NULL!	#NULL!	10.5	#NULL!	#NULL!	#NULL!	#NULL!	41	1.3	3.35	1.28	1.23	421.2	57.8	#NULL!	#NULL!	15.2	#NULL!	601.92	55	1	1	0	1	1	0
1360479	82	1	#NULL!	133	71	112	1	1	1	0	1	1	0	0	0	0	STEMI	1	13.38	139	117	12.56	93.9	0.23	1.7	13	6.62	#NULL!	27.2	186.9	25.3	0.83	2.24	0.89	0.9	421.4	114.9	15.8	#NULL!	259.3	7078	8675	42	1	1	0	1	1	1
982668	79	1	#NULL!	140	80	70	1	0	0		0	0	1	0	0	0	STEMI	0	11.94	134	125	10.46	87.6	#NULL!	#NULL!	12.1	#NULL!	#NULL!	79.1	#NULL!	35.9	1.62	5.15	1.04	3.38	421.6	117.1	#NULL!	#NULL!	96.1	#NULL!	9607	#NULL!	1	1	1	0	1	1
967217	75	0	25.39	144	66	69	1	0	0		0	0	1	0	0	0	UA	1	4.6	107	299	3.15	68.9	#NULL!	#NULL!	9.4	#NULL!	#NULL!	40.7	#NULL!	35.6	1.7	4.12	0.73	2.82	422	156.4	#NULL!	#NULL!	#NULL!	#NULL!	498	#NULL!	1	1	1	1	1	1
1169379	76	1	0	115	64	75	1	0	0		1	0	0	0	0	0	UA	0	7.45	132	157	6.34	85	#NULL!	#NULL!	10.7	#NULL!	#NULL!	15.8	#NULL!	36.2	1.36	5.9	1.67	1.66	422.2	9.5	#NULL!	#NULL!	8.2	#NULL!	793	65	1	1	1	1	1	0
964116	75	1	#NULL!	119	68	67	1	0	0		0	0	1	1	0	0	STEMI	0	6.2	127	143	4.05	65	#NULL!	#NULL!	10.3	#NULL!	#NULL!	20.8	#NULL!	38.2	1.46	4.52	0.87	3.08	422.9	129.3	#NULL!	#NULL!	16.3	#NULL!	1254	71	1	1	1	1	1	0
1115574	81	0	#NULL!	136	68	71	0	0	0		0	0	1	0	0	0	UA	1	5.92	123	297	3.65	61.7	#NULL!	#NULL!	8.4	5.2	#NULL!	4.3	#NULL!	37.5	#NULL!	#NULL!	#NULL!	#NULL!	423	82	#NULL!	#NULL!	6	#NULL!	1339.24	47	1	1	1	1	1	1
1330920	75	1	25.95	123	71	99	0	0	0	0	0	0	1	1	0	0	STEMI	1	11.44	111	176	10.49	91.7	0.45	3.9	10.6	#NULL!	#NULL!	33.3	38	28.4	0.96	3.99	1.16	2.5	423.9	115.2	#NULL!	#NULL!	7.6	1350	7007	36	1	1	1	1	1	1
1345615	76	1	26.9	148	72	72	1	0	0	0	0	0	1	0	0	0	UA	1	6.71	53	275	5.28	78.7	0.89	13.3	9.1	3.71	#NULL!	11.7	17	35.8	1.04	2.59	0.75	1.57	425.1	118.4	14.1	42	3.9	68.78	1023	60	1	1	1	0	1	0
1138668	78	0	#NULL!	58	42	102	1	0	0		0	0	1	0	0	1	NSTEMI	1	14.69	90	222	13.16	89.6	#NULL!	#NULL!	10.7	#NULL!	#NULL!	57.5	#NULL!	29.3	1.44	4.79	0.97	2.93	425.5	136.4	#NULL!	#NULL!	31.3	#NULL!	4992.5	54	1	1	1	1	1	1
1301822	78	1	26.3	180	70	76	1	1	0	0	0	0	1	1	0	0	UA	1	7.57	111	78	5.86	77.4	0.89	11.8	11.4	3.2	#NULL!	19.5	18.8	36.5	0.79	2.41	0.64	1.32	425.5	693.4	13.1	28.7	18.5	#NULL!	3353.69	55	1	1	0	1	1	0
983833	75	0	26.9	149	62	57	1	0	0		0	0	1	0	0	0	UA	1	7.2	111	165	4.46	62.2	#NULL!	#NULL!	10.4	#NULL!	#NULL!	9.1	#NULL!	35.6	1.43	3.73	0.96	2.2	425.7	95.1	#NULL!	#NULL!	#NULL!	#NULL!	164	67	1	1	0	1	1	0
1220840	76	1	19.59	131	81	98	1	1	0		1	0	0	0	0	0	STEMI	1	7.45	#NULL!	202	4.34	58.3	#NULL!	#NULL!	13.1	#NULL!	#NULL!	13.6	#NULL!	36.4	1.04	3.87	1.29	2.09	426	155.2	#NULL!	#NULL!	10.4	#NULL!	3742.32	#NULL!	1	1	1	1	0	1
1321630	78	1	16.98	149	75	59	1	0	0	0	1	0	0	0	0	0	UA	1	7.15	101	153	6.15	86	0.6	8.4	10.6	4.8	#NULL!	#NULL!	#NULL!	#NULL!	#NULL!	#NULL!	#NULL!	#NULL!	426.1	100.5	#NULL!	#NULL!	8.7	14.55	1679.46	56	1	1	1	1	1	1
1020468	76	1	22.6	135	76	70	1	0	0		0	#NULL!	#NULL!	#NULL!	#NULL!	#NULL!	UA	0	#NULL!	123	#NULL!	#NULL!	#NULL!	#NULL!	#NULL!	#NULL!	#NULL!	#NULL!	9.2	#NULL!	#NULL!	1.73	#NULL!	0.93	2.18	426.3	93	#NULL!	#NULL!	9.9	#NULL!	407	64	1	1	1	1	1	#NULL!
1036115	85	1	#NULL!	106	60	83	0	0	0		#NULL!	0	1	0	0	0	STEMI	0	6.12	120	132	3.83	74.71	#NULL!	#NULL!	12.5	#NULL!	#NULL!	16.8	#NULL!	36.7	0.81	4.03	0.81	2.85	426.3	99.9	#NULL!	#NULL!	198	#NULL!	1345	52	1	1	1	0	1	0
352665	79	0	25.89	124	65	87	1	1	0		0	0	0	0	0	0	UA	1	5.51	113	116	4	72.5	#NULL!	#NULL!	10.5	11.2	#NULL!	#NULL!	#NULL!	#NULL!	3.84	4.02	0.91	2.38	426.8	97.3	#NULL!	#NULL!	#NULL!	#NULL!	1327	42	0	1	1	1	1	1
1250532	82	1	22.9	96	54	68	1	0	0		0	0	1	0	0	0	NSTEMI	0	6.09	135	164	4.32	71	#NULL!	#NULL!	10.1	#NULL!	#NULL!	16.5	#NULL!	31.6	0.6	3.23	0.97	1.25	426.9	90.3	#NULL!	#NULL!	10.5	#NULL!	622	56	1	1	0	1	1	0
936939	78	0	#NULL!	111	87	124	1	0	0		0	0	0	0	0	1	UA	1	9.81	127	211	8.31	84.1	#NULL!	#NULL!	11.5	5.9	#NULL!	22.9	#NULL!	24.5	0.92	3.4	0.81	1.94	427.1	77.5	#NULL!	#NULL!	14.5	#NULL!	9600.17	44	1	1	1	1	1	1
875025	80	0	34	124	74	78	1	0	0		1	0	1	0	0	0	UA	1	9.7	105	206	7.45	77.04	#NULL!	#NULL!	12.4	#NULL!	#NULL!	10.4	#NULL!	36	1.35	4.01	0.87	2.65	428.2	80	#NULL!	#NULL!	8.8	#NULL!	6353	44	1	1	0	1	1	1
1145516	85	1	30.12	162	58	45	1	1	0		0	0	1	0	0	0	UA	1	6.39	108	112	4.4	68.8	#NULL!	#NULL!	11.4	6.7	#NULL!	20.5	#NULL!	31.4	1.54	2.78	0.63	1.66	428.3	133.6	#NULL!	#NULL!	6.1	#NULL!	2123.89	65	1	1	1	0	1	1
1165537	78	1	19.6	139	88	78	0	0	0		0	0	1	0	0	0	STEMI	1	7.52	118	263	5.72	76.1	#NULL!	#NULL!	10.8	#NULL!	#NULL!	13.1	#NULL!	29.8	0.73	2.72	0.89	1.44	428.7	99.3	#NULL!	#NULL!	12.8	#NULL!	4660.51	39	1	1	1	1	1	1
1342059	78	1	19.57	184	107	79	1	0	0	0	0	0	1	0	0	0	UA	0	9.14	142	204	6.64	72.7	1.21	13.2	11.5	4.8	4.8	17.4	19.4	39.6	1.1	4.58	1.24	2.84	428.8	64.2	12.2	#NULL!	13	12.21	175.6	54	1	1	1	1	1	0
940897	75	0	#NULL!	174	88	58	1	0	0		0	0	0	0	0	0	UA	0	9.3	121	263	5.91	63.4	#NULL!	#NULL!	10.2	#NULL!	#NULL!	14.7	#NULL!	39.7	1.13	4.24	1.21	2.43	429.2	110.1	#NULL!	#NULL!	8.8	#NULL!	136	54	1	1	1	0	1	0
1187731	75	1	22.83	160	74	57	1	1	0		0	0	0	0	0	0	UA	0	4.66	103	144	3	64.4	#NULL!	#NULL!	9.2	7.8	#NULL!	11.4	#NULL!	42.5	2.11	5.17	1.06	3.7	429.9	106.8	#NULL!	#NULL!	6	#NULL!	205	57	1	1	1	0	1	0
1173463	75	0	17.2	153	94	81	1	0	0		0	1	1	0	0	0	UA	1	3.43	81	117	2.43	70.2	#NULL!	#NULL!	12.6	#NULL!	#NULL!	7.6	#NULL!	24.8	1.36	2.87	0.88	1.51	430.2	98.5	#NULL!	#NULL!	12.8	#NULL!	754.03	25	1	1	0	1	1	1
1294341	77	1	26.5	163	65	68	1	0	0	0	1	0	1	1	0	0	UA	1	10.74	114	154	7.5	69.8	2.06	19.2	11.4	#NULL!	5.4	12	19.1	41.1	1.2	3.4	0.74	2.29	430.3	86.7	14.1	42.6	15.2	14	215.18	63	1	1	1	1	1	1
1323010	75	1	24.52	131	71	64	0	0	0	0	1	0	1	0	0	0	UA	1	3.85	121	88	2.45	63.5	1.08	28.1	12.5	7.6	6.1	26.5	25.9	41.4	4.17	3.88	0.69	2.11	431	64.7	#NULL!	#NULL!	#NULL!	#NULL!	21.12	62	1	1	1	1	1	0
1203790	79	1	26.6	172	93	75	1	0	0		1	0	1	0	0	0	UA	1	5.74	126	130	4.43	77.3	#NULL!	#NULL!	11.9	#NULL!	#NULL!	12.5	#NULL!	37.2	0.73	3.09	0.98	1.77	431.2	88.1	#NULL!	#NULL!	9.3	#NULL!	5400.29	58	1	1	1	1	1	0
1327746	79	1	27.4	128	94	92	1	0	0	0	1	0	1	1	0	1	UA	1	5.95	151	153	4.25	71.4	0.96	16.1	12.2	4.91	#NULL!	16.9	19.5	36.4	2.08	2.97	0.76	1.61	432.1	111.2	11.4	28.2	22.1	11.63	2189.9	56	1	1	1	1	1	0
1270428	80	1	#NULL!	82	62	81	1	1	0		0	0	1	1	0	0	STEMI	1	7.25	116	171	5.85	80.7	#NULL!	#NULL!	11.9	12.1	#NULL!	31.8	#NULL!	31.8	0.74	2.31	0.88	1.02	432.1	106.9	#NULL!	#NULL!	25.4	#NULL!	9356	#NULL!	1	1	1	0	1	1
1256169	82	1	21.97	129	79	76	1	0	0		1	0	1	0	0	0	NSTEMI	0	7.14	135	151	5.96	83.5	#NULL!	#NULL!	10.9	#NULL!	#NULL!	30.2	#NULL!	35.2	2.14	4.37	1.04	2.94	432.6	109.3	#NULL!	#NULL!	15.8	#NULL!	670.57	48	1	1	0	0	1	0
1290497	81	1	#NULL!	102	77	73	1	0	1	0	1	0	0	0	0	1	STEMI	0	8.45	157	154	7.64	90.4	0.64	7.6	12.3	4.43	#NULL!	10.8	97.3	37.3	1.14	3.77	0.8	2.53	432.9	114	13.9	42.5	193.7	1441	3397	#NULL!	1	1	1	1	1	0
1126166	85	1	19.1	118	69	86	0	1	0		1	0	1	0	0	0	NSTEMI	0	7.55	112	151	5.75	76.1	#NULL!	#NULL!	10.7	5.7	#NULL!	12.2	#NULL!	34.5	1.98	3.95	0.91	2.55	433.3	92.9	#NULL!	#NULL!	18	#NULL!	1137.69	51	0	1	1	1	1	0
1269647	80	1	23.8	138	65	72	1	0	0		1	0	1	0	0	0	UA	0	6.08	120	147	3.32	54.6	#NULL!	#NULL!	11.6	#NULL!	#NULL!	10.7	#NULL!	37	0.81	3.65	1.18	2.04	435.1	94	#NULL!	#NULL!	10.9	#NULL!	411.21	53	1	1	0	1	1	0
967755	76	1	23.733	155	60	55	1	0	0		0	0	1	0	0	0	UA	1	4.8	114	211	3.21	66.9	#NULL!	#NULL!	12.7	#NULL!	#NULL!	44.6	#NULL!	38	0.88	4.08	1.05	2.45	435.7	109.7	#NULL!	#NULL!	#NULL!	#NULL!	586	#NULL!	0	0	1	1	1	0
1120805	82	1	#NULL!	78	56	84	1	0	0		0	0	1	0	0	0	STEMI	0	12.61	144	148	10.6	84	#NULL!	#NULL!	11.1	#NULL!	#NULL!	146.5	#NULL!	37.4	1.17	1.93	0.74	0.8	437.3	120.8	#NULL!	#NULL!	190.3	#NULL!	15641	#NULL!	1	1	0	0	1	1
1003118	84	0	#NULL!	133	82	82	1	1	0		0	1	1	0	0	0	UA	0	7.4	137	267	4.34	58.8	#NULL!	#NULL!	8	#NULL!	#NULL!	11	#NULL!	32.8	2.36	5.6	0.92	3.62	439.1	99.6	#NULL!	#NULL!	10.5	#NULL!	430	70	1	0	0	1	1	0
1138808	83	1	19.7	107	55	58	0	0	0		1	0	1	0	0	0	NSTEMI	0	6.89	114	134	5.9	85.7	#NULL!	#NULL!	10.5	#NULL!	#NULL!	80.2	#NULL!	35.6	0.99	3.87	1.2	2.34	439.3	100.5	#NULL!	#NULL!	1334.3	#NULL!	1826	54	0	1	0	0	1	0
1119410	79	1	28.3	135	82	82	1	0	0		1	0	1	0	0	1	STEMI	0	10.17	151	213	5.92	58.2	#NULL!	#NULL!	10.2	6.2	#NULL!	20.8	#NULL!	39.8	3.74	4.66	0.81	3.1	439.6	91.8	#NULL!	#NULL!	26.5	#NULL!	1553	52	1	1	1	1	1	0
1165278	75	1	21.45	115	52	76	1	0	0		1	0	1	1	0	0	NSTEMI	1	8.15	77	206	5.63	69.2	#NULL!	#NULL!	9.7	#NULL!	#NULL!	26.4	#NULL!	38.2	1.61	2.79	0.76	1.6	439.7	73.4	#NULL!	#NULL!	8	#NULL!	1782	56	0	1	0	1	0	0
1250359	78	1	#NULL!	164	65	88	1	0	0		0	0	0	0	0	0	STEMI	1	10.89	120	193	8.64	79.3	#NULL!	#NULL!	11	#NULL!	#NULL!	25.6	#NULL!	34	2.05	4.61	1.01	3.16	439.7	153.8	#NULL!	#NULL!	11.1	#NULL!	#NULL!	59	1	1	1	1	1	1
970137	76	1	#NULL!	147	85	97	1	0	0		1	0	0	0	0	0	UA	0	5.6	174	179	2.86	47.8	#NULL!	#NULL!	9.6	#NULL!	#NULL!	20.3	#NULL!	41.7	2.99	5.78	0.79	4.05	440	94.5	#NULL!	#NULL!	9.8	#NULL!	26	58	1	1	1	0	1	0
992873	76	1	#NULL!	156	77	103	1	0	0		0	0	1	0	0	0	UA	1	8	109	194	7.05	88.5	#NULL!	#NULL!	12.1	4.9	#NULL!	19	#NULL!	34.5	0.82	2.37	0.83	1.27	440.1	117.8	#NULL!	#NULL!	3.1	#NULL!	1639	69	1	1	0	1	1	1
1271138	76	1	#NULL!	128	73	90	0	0	0		1	0	0	0	0	0	STEMI	1	9.33	91	444	8.77	93.9	#NULL!	#NULL!	9	#NULL!	#NULL!	36.2	#NULL!	31.1	3.07	4.92	0.84	3.41	440.1	145.8	#NULL!	#NULL!	22.4	#NULL!	4491.93	52	1	1	0	0	1	1
1115482	77	1	24.8	138	58	64	1	0	0		1	0	1	0	0	0	UA	1	7.1	125	139	5.16	72.74	#NULL!	#NULL!	14.2	#NULL!	#NULL!	15.6	#NULL!	35.2	1.5	3.52	1.05	2.1	441	105.5	#NULL!	#NULL!	9.5	#NULL!	1204.14	#NULL!	1	1	0	0	1	1
1015141	76	0	23.873	118	65	93	1	1	0		0	0	1	1	0	0	UA	1	8.7	143	246	4.97	57	#NULL!	#NULL!	8.2	6.3	#NULL!	18	#NULL!	38.1	2.3	3.73	0.18	2.22	441.6	68.1	#NULL!	#NULL!	19.5	#NULL!	1704	66	1	1	0	1	1	1
1365290	84	1	#NULL!	119	82	97	0	0	1	1	1	0	0	0	0	1	STEMI	0	9.42	107	84	8.26	87.7	0.68	7.2	12	#NULL!	6.1	197.5	398.9	31.3	0.71	3.02	1.28	1.3	441.9	189.1	19.8	#NULL!	128	3129	7533	60	1	1	1	1	1	1
989992	81	0	#NULL!	145	64	88	1	0	0		0	0	1	0	0	0	UA	1	7.6	93	225	6.03	79	#NULL!	#NULL!	12.4	#NULL!	#NULL!	12.4	#NULL!	32	#NULL!	#NULL!	#NULL!	#NULL!	443.1	115.5	#NULL!	#NULL!	6.4	#NULL!	397	64	1	1	1	1	1	0
1276119	75	1	26.6	114	71	88	0	0	0		0	0	1	1	0	0	UA	1	7.6	144	180	3.45	45.4	#NULL!	#NULL!	12.6	#NULL!	#NULL!	9.5	#NULL!	36.3	1.33	3.8	0.84	2.34	443.1	81.4	#NULL!	#NULL!	10.3	#NULL!	132.53	66	1	1	0	1	1	1
1180540	80	1	25.35	136	72	81	1	0	0		1	0	1	0	0	0	UA	0	6.11	125	237	4.11	67.2	#NULL!	#NULL!	9.8	#NULL!	#NULL!	47.2	#NULL!	37	2.02	3.76	1	2.25	443.3	93.9	#NULL!	#NULL!	14.2	#NULL!	108.67	63	1	1	1	1	1	0
996026	75	1	15.616	132	80	72	0	0	0		1	0	1	0	0	0	STEMI	0	6.6	132	113	5.03	76.44	#NULL!	#NULL!	13.1	#NULL!	#NULL!	25.4	#NULL!	31.6	1.06	4.83	1.26	2.75	444.4	189	#NULL!	#NULL!	10.9	#NULL!	1161	61	1	1	1	1	1	0
1221676	77	0	22.89	147	48	58	1	0	0		0	0	1	0	0	0	UA	0	4.97	57	102	3.19	64.2	#NULL!	#NULL!	11.8	#NULL!	#NULL!	5.3	#NULL!	23.7	1.29	2.97	0.87	1.55	446.4	287.1	#NULL!	#NULL!	3.5	#NULL!	8555.48	48	1	1	0	1	1	1
1262265	80	1	19.5	100	76	90	1	0	0		0	0	0	0	0	1	STEMI	1	14.39	108	142	12.54	87.2	#NULL!	#NULL!	12.6	#NULL!	#NULL!	64.8	#NULL!	36.3	1.09	3.86	0.99	2.55	446.7	183.1	#NULL!	#NULL!	177.7	#NULL!	16024	#NULL!	1	1	1	1	1	1
1169382	77	1	#NULL!	128	79	84	1	1	0		1	1	1	0	0	0	STEMI	0	11.53	148	201	10.45	90.7	#NULL!	#NULL!	12.4	14.8	#NULL!	42.7	#NULL!	32.3	3.26	5.6	1.34	3.65	447.4	164.8	#NULL!	#NULL!	89.6	#NULL!	9947	29	1	1	1	1	1	1
1291084	76	1	24.8	100	61	100	0	0	1	0	1	0	1	0	0	1	UA	1	7.23	129	147	4.72	65.3	1.54	21.3	11.9	4.4	#NULL!	13.1	21.5	33.1	1.01	3.82	1.03	2.4	447.6	126.1	14.6	37.5	6.9	#NULL!	4280.28	31	1	1	1	1	1	1
970164	76	1	#NULL!	92	57	75	1	0	0		0	0	1	0	0	0	STEMI	0	#NULL!	68	#NULL!	#NULL!	#NULL!	#NULL!	#NULL!	#NULL!	#NULL!	#NULL!	11	#NULL!	#NULL!	0.59	#NULL!	0.97	1.32	447.6	147.6	#NULL!	#NULL!	#NULL!	#NULL!	#NULL!	32	0	0	1	0	1	1
295195	84	1	23.74	165	86	86	1	0	0		1	0	1	0	1	1	UA	1	4.9	138	122	3.01	61.6	#NULL!	#NULL!	9	5	#NULL!	14.1	#NULL!	40.8	1.04	1.04	1	1.28	447.9	107.9	#NULL!	#NULL!	21.4	#NULL!	2184.71	50	0	0	0	1	0	1
1180582	76	1	20.28	133	79	75	0	1	0		0	0	0	0	0	0	UA	1	6.59	130	108	4.74	71.8	#NULL!	#NULL!	11.6	7.8	#NULL!	11.3	#NULL!	36.2	1.19	2.21	0.58	1.33	448.5	115	#NULL!	#NULL!	12	#NULL!	5073.64	30	1	1	1	0	1	1
1307370	77	1	#NULL!	97	57	82	0	0	0	0	1	0	0	0	0	1	STEMI	1	7.1	105	36	5.59	78.7	0.93	13.1	12.5	#NULL!	6.1	2519.5	791.2	23.5	0.78	2.42	0.86	1.02	449.2	179.7	16.2	44.9	88.8	5241	6809.91	#NULL!	1	1	0	0	1	1
1111557	77	1	23.05	124	75	89	0	1	0		1	0	0	0	0	0	STEMI	1	6.58	126	247	4.54	69	#NULL!	#NULL!	11.5	7.4	#NULL!	20.3	#NULL!	33.2	1.21	#NULL!	0.8	2.38	449.9	203.9	#NULL!	#NULL!	24.5	#NULL!	2308	40	1	1	0	1	0	1
1379221	80	1	20.2	131	55	72	1	1	0	1	1	0	1	0	0	0	NSTEMI	0	4.79	96	163	3.22	67.3	0.95	19.3	11.8	#NULL!	5.4	13.4	11.3	34	1.4	2.96	0.57	1.91	450.1	104.7	13.3	27.9	8.8	59.19	3785	41	0	1	0	1	1	1
660839	88	0	18.36	106	43	102	1	0	0	0	0	0	0	0	0	0	NSTEMI	0	11.97	67	163	10.12	84.5	1.67	14	9.6	4.88	#NULL!	17	85.7	27	0.51	3.99	1.5	2.06	450.8	95.4	#NULL!	#NULL!	97.6	717.9	9165	58	1	1	1	1	1	1
1173489	79	0	20.7	153	73	76	1	1	0		#NULL!	0	1	0	0	0	UA	0	10.34	119	143	5.8	61.3	#NULL!	#NULL!	9.9	6.8	#NULL!	14.8	#NULL!	33.1	1.74	2.78	1.22	0.98	451.5	99.6	#NULL!	#NULL!	#NULL!	#NULL!	156.61	#NULL!	1	1	1	1	1	0
1078166	75	1	20.76	186	81	55	1	0	0		1	0	1	0	0	0	UA	0	5.27	122	214	3.84	72.8	#NULL!	#NULL!	10.9	#NULL!	#NULL!	23.3	#NULL!	43.1	1.32	3.52	1.01	2.04	451.9	82.7	#NULL!	#NULL!	9.4	#NULL!	397.75	68	1	1	1	1	1	0
1312637	76	1	24.5	143	83	85	1	1	1	0	1	0	1	0	0	0	STEMI	0	11.18	126	217	6.85	61.2	2.67	23.9	11.2	7.8	8.4	21.1	35.2	33.7	6.83	4.53	0.84	2.44	453.8	155.1	13.3	#NULL!	29.8	#NULL!	935.37	63	1	1	0	1	1	0
1322337	87	0	20.83	179	74	65	1	1	0	0	0	0	1	0	0	0	UA	1	5.57	115	142	3.23	58	1.99	35.7	13	6.8	8.1	11	20.3	37.1	2.53	5.11	0.81	3.75	454	77.9	13.5	49.5	7.8	#NULL!	#NULL!	#NULL!	1	1	1	1	1	0
1344774	77	1	24.91	166	100	55	1	1	0	0	1	0	0	0	0	0	UA	1	5.31	102	183	3.38	63.7	1.27	23.9	10.2	5.69	7	11.5	16.7	40	1.35	3.07	1.05	1.51	455.1	137.3	12.2	37.9	20.1	#NULL!	1678.9	56	1	1	0	0	1	0
739455	75	0	26.22	155	68	79	1	1	1	0	0	0	1	0	0	0	UA	1	9.29	141	217	6.98	75.1	1.69	18.2	11.4	10.22	8	11.7	11.5	35	2.51	5.74	1.56	3.46	455.8	574	12.3	34.5	15.2	54.23	587.7	67	1	1	0	1	1	1
1111362	75	1	17.96	171	80	52	1	0	0		1	0	0	0	0	0	UA	0	4.38	119	132	2.34	53.3	#NULL!	#NULL!	12.5	#NULL!	#NULL!	14.7	#NULL!	41.4	0.44	3.73	1.55	1.92	456.8	115.9	#NULL!	#NULL!	15.1	#NULL!	228	#NULL!	1	1	0	1	1	0
1242321	80	1	26.89	169	90	82	1	0	0		0	1	0	0	0	0	UA	1	5.31	135	90	3.53	66.5	#NULL!	#NULL!	12.4	#NULL!	#NULL!	11.4	#NULL!	39.2	1.28	3.45	1.21	1.88	458.7	101.6	#NULL!	#NULL!	8.8	#NULL!	89	60	1	1	0	1	1	1
1236016	79	1	22.49	119	64	85	1	0	0		1	0	0	0	0	0	UA	0	7	123.8	219	4.55	65	#NULL!	#NULL!	9.4	6	#NULL!	24.9	#NULL!	36.4	4.09	5.33	1.19	3.34	459.3	123.8	#NULL!	#NULL!	11.5	#NULL!	589	58	0	0	0	1	1	0
1204330	81	0	#NULL!	170	82	93	1	0	0		0	1	0	0	0	0	STEMI	1	10.43	117	151	9.03	86.6	#NULL!	#NULL!	10.5	#NULL!	#NULL!	26.5	#NULL!	34.8	1.07	4.44	1.27	2.54	460.1	80.5	#NULL!	#NULL!	34.7	#NULL!	3050.94	40	1	1	1	1	1	1
1093122	78	0	28.89	194	67	52	1	0	0		0	0	1	0	0	0	UA	1	6.98	106	205	5.1	73.1	#NULL!	#NULL!	13.6	#NULL!	#NULL!	23.9	#NULL!	36.2	0.87	3.11	0.95	1.88	460.7	149.6	#NULL!	#NULL!	8.7	#NULL!	3093.06	57	1	1	0	1	1	1
1299293	76	1	#NULL!	153	76	82	1	0	0	1	1	0	1	0	0	0	NSTEMI	1	11.4	103	229	9.86	86.4	1.5	13.2	10	#NULL!	#NULL!	181.4	300.6	17.6	#NULL!	#NULL!	#NULL!	#NULL!	462.1	247	22.4	59.2	15	#NULL!	6711	41	0	0	0	0	0	0
1025753	84	1	24.34	118	51	55	1	0	0		0	0	1	0	0	1	NSTEMI	0	9.21	119	162	7.54	81.9	#NULL!	#NULL!	14.1	#NULL!	#NULL!	18	#NULL!	35.2	2.79	6.41	0.86	4.18	463.5	148.3	#NULL!	#NULL!	65.8	#NULL!	977.59	45	0	1	1	0	1	0
1363515	86	0	#NULL!	177	81	84	1	1	1	1	1	1	0	0	0	0	NSTEMI	1	7.07	81	159	6.41	90.7	0.61	8.6	11.1	#NULL!	5.5	20	102.4	35.8	1.4	6.12	1.15	4.42	464	256.7	14	57.2	96	8083	#NULL!	46	1	1	0	0	1	1
1067931	79	1	23.85	143	93	80	1	1	0		1	0	0	0	0	0	UA	0	4.63	112	124	3.07	66.3	#NULL!	#NULL!	11.7	4.8	#NULL!	18	#NULL!	30.6	0.38	#NULL!	0.8	0.92	464.1	119.1	#NULL!	#NULL!	9.4	#NULL!	2961.58	54	0	1	1	1	1	1
1367341	76	1	26.79	152	86	56	1	0	0	0	1	0	1	0	0	0	UA	1	5.93	147	221	3.67	61.9	1.65	27.8	10.7	4.96	5.5	9.8	18.2	32.1	1.86	5.52	1.52	3.56	464.2	108.7	10.8	23.5	12.8	75.16	320.08	56	1	1	1	1	1	0
1187738	80	1	22.96	146	56	59	1	0	0		0	0	1	0	0	0	UA	1	4.67	118	41	2.13	45.6	#NULL!	#NULL!	#NULL!	#NULL!	#NULL!	59.3	#NULL!	32.8	0.68	3.33	1.38	1.53	464.6	199.4	#NULL!	#NULL!	24.1	#NULL!	5052.44	37	0	0	1	1	1	1
1189740	92	0	#NULL!	172	81	70	1	0	0		0	0	1	0	0	0	NSTEMI	1	7.08	89	202	5.78	81.7	#NULL!	#NULL!	9.9	5.3	#NULL!	18.2	#NULL!	24.6	1.08	5.72	1.62	3.8	464.9	204	#NULL!	#NULL!	15.7	#NULL!	35000	51	1	1	1	1	1	1
1246441	76	0	#NULL!	124	72	65	1	0	0		0	0	0	0	0	0	UA	1	5.9	112	104	4.72	80	#NULL!	#NULL!	11.5	8.2	#NULL!	20.4	#NULL!	31.5	0.57	4.46	1.39	2.78	465.2	112.4	#NULL!	#NULL!	9.2	#NULL!	5206.59	40	0	1	1	1	1	1
1020129	78	1	25.26	130	70	90	1	1	0		0	0	1	0	0	0	UA	1	8.4	145	165	6.12	73	#NULL!	#NULL!	11.3	#NULL!	#NULL!	13.3	#NULL!	39.9	2.82	5.75	1.13	3.53	466	105.7	#NULL!	#NULL!	14.6	#NULL!	1232	55	1	1	1	1	1	0
1268863	75	1	20.6	161	86	80	0	0	0		0	0	0	0	0	0	UA	0	5.41	133	196	3.7	68.4	#NULL!	#NULL!	11.9	4.7	#NULL!	21.5	#NULL!	29.9	0.99	5.61	1.08	4.12	466.1	137.7	#NULL!	#NULL!	10.1	#NULL!	966.27	57	1	1	0	1	1	0
1273493	87	1	#NULL!	98	67	137	1	0	0		1	0	1	0	0	1	STEMI	0	4.1	102	190	2.01	49	#NULL!	#NULL!	10.2	#NULL!	#NULL!	20	#NULL!	36.9	1.42	4.64	0.86	3.26	466.3	63.9	#NULL!	#NULL!	11.8	#NULL!	3374	50	0	1	0	1	1	1
1173477	77	1	23.1	165	95	54	1	0	0		0	0	1	0	0	1	UA	1	6.7	175	183	4.77	71.3	#NULL!	#NULL!	10.8	8.4	#NULL!	24.5	#NULL!	36.6	1.56	3.56	0.89	1.64	466.7	113.9	#NULL!	#NULL!	17.4	#NULL!	901.66	59	1	1	1	1	1	0
1177037	84	0	26.67	118	86	81	1	0	0	0	0	0	1	0	0	1	UA	1	6.28	131	155	3.99	63.5	1.76	28	12.1	4.71	#NULL!	7.3	13.5	36.2	1.71	3.51	0.62	2.36	467.7	82.6	21.9	41.8	9.6	3.92	926	57	0	0	0	1	1	0
#NULL!	81	1	17.91	121	67	110	0	0	0		1	1	1	0	0	0	UA	1	5.49	112	128	3.6	65.5	#NULL!	#NULL!	11.4	#NULL!	#NULL!	34.8	#NULL!	35.5	0.55	#NULL!	1.2	1.49	468.6	206	#NULL!	#NULL!	11	#NULL!	21070	24	1	1	1	0	1	1
1028210	79	1	23.87	114	60	64	1	1	0		1	1	1	0	0	0	NSTEMI	1	5.49	113	162	3.8	69.2	#NULL!	#NULL!	12.7	4	#NULL!	48.8	#NULL!	41.6	2.13	3	0.56	1.57	469.3	82.3	#NULL!	#NULL!	7.4	#NULL!	126	65	1	1	1	0	1	0
948585	80	0	19.2	109	59	82	0	0	0		0	0	1	0	0	0	UA	1	7	112	238	4.43	63.8	#NULL!	#NULL!	11.4	#NULL!	#NULL!	44.4	#NULL!	37.8	1.17	4.74	1.13	3.12	469.4	135	#NULL!	#NULL!	4.1	#NULL!	191	60	1	1	1	1	1	0
1055255	84	1	27.18	122	53	85	1	0	0	0	0	1	1	0	0	0	UA	1	8.19	122	135	6.97	85.1	0.8	9.8	10.1	6.57	#NULL!	28.1	22.4	42.1	0.43	2.48	1.57	0.68	469.9	97.7	13.2	33.3	#NULL!	40	696.15	59	0	1	0	1	1	1
1316148	76	1	#NULL!	92	49	60	0	0	0	0	0	0	1	0	0	0	STEMI	0	9.27	110	163	7.96	85.9	0.75	8.1	12.5	#NULL!	#NULL!	31.6	190.1	32.6	1.11	3.96	1.03	2.7	469.9	129.8	13.7	47.7	240.7	3356	4231	52	1	1	1	1	1	1
1118172	82	1	#NULL!	94	61	70	1	1	0		0	0	1	0	0	1	STEMI	1	12.73	106	275	11.41	89.5	#NULL!	#NULL!	11.5	#NULL!	#NULL!	186.7	#NULL!	28.3	#NULL!	#NULL!	#NULL!	#NULL!	473.3	#NULL!	#NULL!	#NULL!	472.1	#NULL!	1948	#NULL!	1	1	0	0	1	1
1302028	76	0	22.67	144	63	58	1	1	0	0	0	0	1	0	0	0	UA	1	6.81	115	246	4.11	60.4	2.18	32	10	5.4	6.7	16.7	20.7	42	2.94	3.85	0.88	2.29	476.1	87.5	10.4	0.83	11.8	#NULL!	1632.68	67	1	#NULL!	1	0	1	1
1268891	94	1	20.9	155	74	82	1	0	0		0	0	1	0	0	0	UA	0	6.61	115	170	4.69	71	#NULL!	#NULL!	11.4	4.8	#NULL!	11.4	#NULL!	34.2	0.89	4.11	1.28	2.48	478.7	137.7	#NULL!	#NULL!	9	#NULL!	529.44	58	1	1	0	1	1	0
1322992	79	1	23.24	167	87	85	1	0	1	0	1	0	1	0	0	0	UA	0	3.99	124	81	1.99	49.9	1.43	35.8	12.3	5.36	#NULL!	11.3	18.1	36.7	1.09	3.96	1.03	2.57	479.7	131	11.7	31.5	11.3	8.91	143.05	65	1	1	1	1	1	0
1315417	85	1	29.76	126	62	84	0	1	0	0	1	1	1	0	0	0	UA	0	6.72	84	164	5.13	76.3	1.2	17.9	11	#NULL!	6.6	16.9	18.5	37.7	0.71	4.02	1.62	2.1	480.1	75.1	13.1	34.6	13	18.25	125.2	55	0	1	1	0	1	0
1154169	79	0	20.43	127	77	71	0	0	0		0	0	0	0	0	0	UA	1	5.12	114	101	3.09	60.3	#NULL!	#NULL!	10.9	#NULL!	#NULL!	17.5	#NULL!	38.7	1.67	2.7	1.01	1.13	481.3	121.8	#NULL!	#NULL!	10.2	#NULL!	1379	40	1	1	0	1	1	1
721443	78	1	24.73	144	70	75	1	0	0		#NULL!	1	1	0	0	0	UA	1	5.41	111	162	3.34	61.8	#NULL!	#NULL!	10.8	#NULL!	#NULL!	44.3	#NULL!	30.4	2.07	4.66	1.21	3.21	481.4	145.9	#NULL!	#NULL!	#NULL!	#NULL!	38.9	66	0	0	0	1	1	0
947258	82	0	27	131	62	77	1	1	0		0	0	1	0	0	0	UA	1	7.82	101	179	5.83	74.5	#NULL!	#NULL!	13.9	8.9	#NULL!	6.5	#NULL!	32.7	1.02	4.41	1.21	2.76	481.8	124.3	#NULL!	#NULL!	11.9	#NULL!	671.56	59	1	1	1	1	1	0
1288194	79	1	23.87	170	81	82	1	0	0	0	1	1	1	1	0	0	NSTEMI	1	8.3	124	231	6.13	73.9	1.45	17.5	10.2	#NULL!	#NULL!	14.4	16.5	38.6	1.49	4.4	0.89	2.96	482.4	173.8	12.2	#NULL!	18.8	49.57	543.8	70	1	1	0	1	0	1
1020468	78	1	23.52	160	105	85	1	0	0	0	0	0	1	1	0	0	UA	0	4.49	132	138	3	66.8	1.09	24.3	12.6	5.16	#NULL!	15.8	18.3	45.8	2.58	4.66	1.14	2.99	483.1	135.9	10.2	#NULL!	#NULL!	13.96	407.09	65	1	1	1	1	1	0
1173970	75	1	23.84	118	67	72	1	0	0		1	0	0	0	0	0	STEMI	0	8.73	108	149	3.73	64.4	#NULL!	#NULL!	10.1	#NULL!	#NULL!	42.4	#NULL!	31.1	1.45	3.91	1.02	2.41	483.3	101.9	#NULL!	#NULL!	17.5	#NULL!	4633	41	1	1	1	1	1	0
1234760	75	1	27.99	156	85	78	1	0	0		1	0	1	0	0	0	STEMI	0	7.9	129	255	4.6	58.3	#NULL!	#NULL!	11.5	6.5	#NULL!	33.5	#NULL!	35.3	0.92	4.3	0.95	2.96	485.9	122.6	#NULL!	#NULL!	11.9	#NULL!	5234	44	1	1	1	1	1	1
#NULL!	78	1	22.04	137	71	71	1	0	0	1	0	0	0	1	0	0	UA	0	4.98	106	179	3.49	70.1	1.25	25.1	11.2	4.67	5.2	11.4	16.7	37.3	1.98	2.9	0.97	1.43	487.8	168	#NULL!	#NULL!	10.5	#NULL!	812.44	61	1	1	0	1	1	0
1256170	75	0	#NULL!	123	48	83	1	0	0		0	0	1	1	1	0	UA	1	6.64	110	315	4.63	69.8	#NULL!	#NULL!	10.7	5.4	#NULL!	42.9	#NULL!	35.7	1.09	4.73	1.29	3.09	491.4	58	#NULL!	#NULL!	6.3	#NULL!	1664.15	54	1	1	1	1	1	0
701632	78	1	22.86	113	63	49	1	0	0	0	0	0	1	0	0	0	UA	1	3.82	117	203	2.03	53.2	1.33	34.8	9.3	#NULL!	5.8	9.5	14.1	33.4	0.91	2.83	1.05	1.43	492	109.2	13.8	#NULL!	6	7.59	286.86	60	1	1	1	0	1	0
167504	78	1	23.88	120	45	55	1	1	0		1	1	1	0	1	0	UA	1	5.69	113	126	4.03	70.8	#NULL!	#NULL!	13.6	#NULL!	#NULL!	18	#NULL!	36.2	0.63	2.7	0.81	1.63	498.1	139.8	#NULL!	#NULL!	17.7	#NULL!	3015.92	52	1	1	1	1	1	1
457894	78	1	#NULL!	154	72	70	1	1	0		#NULL!	#NULL!	#NULL!	#NULL!	#NULL!	#NULL!	UA	0	#NULL!	111	#NULL!	#NULL!	#NULL!	#NULL!	#NULL!	#NULL!	#NULL!	#NULL!	23.5	#NULL!	#NULL!	1.1	#NULL!	0.82	1.24	499.9	74.4	#NULL!	#NULL!	12.2	#NULL!	195	60	0	1	0	1	1	#NULL!
1016471	77	1	25.1	157	77	62	1	0	0		1	0	1	0	0	0	UA	0	6.5	133	262	3.66	55.9	#NULL!	#NULL!	11.6	#NULL!	#NULL!	26.5	#NULL!	36.4	1.29	4.27	0.88	2.71	502.9	98.4	#NULL!	#NULL!	20.7	#NULL!	55	60	1	0	0	1	1	0
1339180	75	1	27.77	124	67	53	1	0	0	0	0	0	1	0	0	0	UA	1	4.53	129	130	2.34	51.7	1.74	38.4	12.3	4.9	5.5	18.8	29.6	42.9	1.22	3.19	1.14	1.58	503.9	135.8	11	#NULL!	18.3	#NULL!	614.14	48	1	1	1	1	0	1
1339663	76	1	23.59	143	85	109	1	0	1	0	0	0	1	0	0	0	NSTEMI	0	4.08	141	70	2.23	54.6	0.9	22.1	12.2	4.64	#NULL!	529.9	118.1	30.5	1.7	4.8	0.58	3.32	505	282.1	12.8	45.7	28.8	3941	4037.76	34	1	1	1	1	1	1
1123561	75	1	20.2	176	103	88	1	0	0		1	0	1	1	0	0	UA	1	6.5	123	184	4.05	62.2	#NULL!	#NULL!	11.9	#NULL!	#NULL!	9	#NULL!	30.9	1.05	7.45	1.28	5.7	505.4	95.7	#NULL!	#NULL!	10.2	#NULL!	4796	29	1	1	1	1	1	1
1172083	77	1	27.12	154	64	61	1	1	0		1	0	1	1	0	0	UA	1	9.8	78	104	7.77	79.3	#NULL!	#NULL!	11.4	4.6	#NULL!	13.5	#NULL!	34.3	0.75	3.4	1.09	1.99	506.1	653.8	#NULL!	#NULL!	12.3	#NULL!	3461.37	61	1	1	0	1	1	1
1072350	82	0	#NULL!	123	75	111	0	0	0		0	0	1	0	0	0	NSTEMI	1	5.77	94	158	3.62	62.8	#NULL!	#NULL!	12.6	#NULL!	#NULL!	25.9	#NULL!	42.6	1.88	4.15	0.91	3.12	507.5	84.5	#NULL!	#NULL!	#NULL!	#NULL!	35000	44	1	1	0	0	1	1
1104885	75	0	#NULL!	99	64	119	0	0	0		0	0	1	1	0	0	STEMI	0	13.51	88	150	12.06	89.31	#NULL!	#NULL!	12.8	#NULL!	#NULL!	15.9	#NULL!	28.2	#NULL!	#NULL!	#NULL!	#NULL!	507.8	29.8	#NULL!	#NULL!	29.9	#NULL!	9656	30	0	1	1	1	1	1
1185030	79	1	#NULL!	140	65	72	1	1	0		0	0	1	1	0	0	NSTEMI	1	7.56	125	128	4.92	65.1	#NULL!	#NULL!	11.4	#NULL!	#NULL!	17.6	#NULL!	37.2	2.21	3.76	0.97	2.13	509.1	122.6	#NULL!	#NULL!	18.8	#NULL!	15000	40	0	1	1	1	1	1
1003291	76	0	20.9	138	63	86	1	0	0		0	0	1	0	0	0	UA	0	#NULL!	102	#NULL!	#NULL!	#NULL!	#NULL!	#NULL!	#NULL!	#NULL!	#NULL!	#NULL!	#NULL!	#NULL!	#NULL!	#NULL!	#NULL!	#NULL!	510	#NULL!	#NULL!	#NULL!	#NULL!	#NULL!	#NULL!	#NULL!	1	1	0	1	1	0
1270778	85	0	20.96	129	67	67	1	0	0		0	0	1	0	0	0	UA	1	6.54	107	161	4.37	66.9	#NULL!	#NULL!	10.3	4.1	#NULL!	20.9	#NULL!	42.3	1.1	4.66	2.01	2.29	510.6	162.8	#NULL!	#NULL!	#NULL!	#NULL!	369.56	59	0	1	0	1	1	0
1341916	79	1	24.22	134	66	68	1	0	0	0	1	0	1	1	0	0	UA	1	7.15	132	147	4.19	58.5	2.3	32.2	12.7	5.6	#NULL!	8.2	15.2	37.8	1.67	4.49	0.99	2.76	515.4	133	#NULL!	#NULL!	47.4	53.9	1487.33	#NULL!	0	1	0	0	1	1
1145044	77	1	26.4	160	71	65	0	0	0		0	0	1	0	0	1	UA	1	7.31	132	168	5.14	70.3	#NULL!	#NULL!	10.7	#NULL!	#NULL!	14.7	#NULL!	37	0.58	2.48	1.05	1.19	515.7	133.3	#NULL!	#NULL!	17.7	#NULL!	927.52	58	1	1	0	0	1	1
1092037	89	0	26.67	136	62	84	1	1	0		0	0	1	0	0	0	NSTEMI	1	9.21	83	159	7.34	79.7	#NULL!	#NULL!	9.6	10.9	#NULL!	27	#NULL!	24	2.71	4.04	0.76	2.38	517.2	152.4	#NULL!	#NULL!	30.5	#NULL!	8311.3	46	0	1	0	0	1	1
1214709	77	1	22.49	146	83	75	1	1	0		1	0	0	0	0	0	UA	1	6.24	84	157	4.83	77.4	#NULL!	#NULL!	10.9	9.6	#NULL!	10.5	#NULL!	31.8	0.82	3.94	1.44	2.09	518.5	275.6	#NULL!	#NULL!	#NULL!	#NULL!	2745.61	59	1	1	1	1	1	1
978969	78	1	#NULL!	100	48	62	1	0	0	0	0	0	1	1	0	0	NSTEMI	0	5.96	118	218	4.04	67.8	1.02	17.1	10.7	4.81	#NULL!	46.5	184.4	32.1	#NULL!	#NULL!	#NULL!	#NULL!	518.9	121.2	#NULL!	#NULL!	56.5	5264	3059.17	54	1	0	0	1	1	0
1322188	76	1	20.8	125	87	52	0	0	0	1	1	0	1	0	0	0	UA	0	4.57	123	177	2.29	50.1	1.61	35.2	10.7	4.59	#NULL!	14.2	22	38.8	1.48	4.08	1.17	2.62	519.8	106.1	13.9	37.4	11.4	#NULL!	251.3	62	1	1	0	0	1	0
981276	75	1	#NULL!	135	82	93	1	0	0		1	0	1	1	0	0	NSTEMI	1	4.1	139	214	2.55	62.3	#NULL!	#NULL!	9.8	#NULL!	#NULL!	18.4	#NULL!	37.7	2.77	4.33	0.87	2.59	522.7	138.6	#NULL!	#NULL!	14.2	#NULL!	3578	46	1	1	0	1	1	0
1164639	77	0	26.3	93	65	86	1	0	0		0	0	1	0	0	1	UA	1	4.23	112	133	2.41	56.9	#NULL!	#NULL!	12.4	#NULL!	#NULL!	32.4	#NULL!	37	1.21	4.22	0.88	2.96	523.1	72.7	#NULL!	#NULL!	11.3	#NULL!	2400.56	42	0	0	1	1	1	1
1204343	76	1	26.08	111	69	95	1	1	0	0	1	0	1	0	0	0	UA	0	9.1	132	215	6.76	74.4	1.76	19.3	11	6.53	7.1	36.9	23.2	40.1	5.64	3.53	0.58	2.05	526	130.6	11.3	24.4	37.6	12.32	43.1	73	1	1	1	1	1	0
915508	83	1	#NULL!	154	88	54	1	0	0		1	1	1	0	0	0	STEMI	1	11.1	124	179	8.29	74.9	#NULL!	#NULL!	10.8	#NULL!	#NULL!	98.9	#NULL!	28.9	1.14	3.49	0.63	2.52	526.6	152.2	#NULL!	#NULL!	10.7	#NULL!	12628	59	1	1	0	0	1	1
1218828	76	1	28.81	170	90	89	1	1	0		0	0	0	0	0	0	NSTEMI	1	9.04	75	211	7.65	84.7	#NULL!	#NULL!	10.6	12.9	#NULL!	10.7	#NULL!	27.1	1.75	4.44	0.58	3.09	527.8	549.2	#NULL!	#NULL!	12.6	#NULL!	6821	54	1	1	0	0	1	1
1173463	77	0	18.31	117	71	71	1	0	0	0	0	0	0	0	0	0	UA	1	4.34	101	125	2.69	62	1.02	23.5	13.2	#NULL!	#NULL!	14	32.3	36.9	1.09	3.23	1.37	1.51	528.3	89.9	11.3	30.8	14	9.83	3178.41	46	1	1	0	1	1	0
882305	83	1	#NULL!	137	66	118	1	0	0		0	1	1	0	0	1	UA	1	3.7	124	117	2.54	69.1	#NULL!	#NULL!	9.7	#NULL!	#NULL!	12.8	#NULL!	37.2	1.28	4.6	1.14	2.94	532.5	79.3	#NULL!	#NULL!	#NULL!	#NULL!	1627	59	1	1	1	1	1	1
1294416	83	1	20.8	155	63	76	1	1	0	0	0	0	0	0	0	1	NSTEMI	0	4.62	89	150	2.83	61.3	1.2	26	10.6	#NULL!	5.4	12	15.2	29.9	0.52	2.09	1.02	0.8	533.3	242.8	13.2	28.3	19.4	#NULL!	2164.86	61	1	1	0	1	1	0
968001	75	1	#NULL!	186	96	72	1	0	0		1	0	1	0	0	0	STEMI	0	5.7	166	89	4.23	74.7	#NULL!	#NULL!	11.8	#NULL!	#NULL!	81.4	#NULL!	32.5	0.87	4.08	0.98	2.97	533.7	149.3	#NULL!	#NULL!	30.4	#NULL!	5547	41	1	1	0	1	1	1
1290370	75	1	#NULL!	149	73	76	1	0	0	0	1	0	0	0	0	0	UA	0	9.55	124	213	8.37	87.6	0.54	5.7	10.1	#NULL!	5.85	10.3	17.4	38.3	0.57	3.45	1.04	2.18	537.4	120.1	11.2	#NULL!	10.8	#NULL!	653.28	#NULL!	1	1	0	0	1	0
1177037	83	0	27.56	109	57	75	1	0	0		0	0	0	0	0	1	UA	1	5.32	121	174	3.29	61.7	#NULL!	#NULL!	10.9	#NULL!	#NULL!	13.7	#NULL!	35.8	1.86	3.62	0.78	2.49	538.7	109.5	#NULL!	#NULL!	9.3	#NULL!	153.7	58	1	1	0	1	1	1
802679	77	1	#NULL!	130	80	72	1	0	0		0	0	1	1	0	1	UA	0	6.5	91	133	5.05	77.61	#NULL!	#NULL!	14.6	#NULL!	#NULL!	16.8	#NULL!	32.4	0.89	5.11	0.86	3.33	540.2	593.7	#NULL!	#NULL!	13.9	#NULL!	11573	72	1	1	0	1	1	1
1108345	82	1	#NULL!	119	82	110	0	0	0		0	0	1	1	0	0	STEMI	1	5.21	98	164	3.58	68.7	#NULL!	#NULL!	11	5.9	#NULL!	19.6	#NULL!	32.9	#NULL!	#NULL!	#NULL!	#NULL!	544.8	367.4	#NULL!	#NULL!	6.8	#NULL!	30590	#NULL!	1	1	0	1	1	1
721201	79	1	#NULL!	123	56	52	1	0	0		#NULL!	#NULL!	#NULL!	#NULL!	#NULL!	#NULL!	UA	0	#NULL!	151	#NULL!	#NULL!	#NULL!	#NULL!	#NULL!	#NULL!	#NULL!	#NULL!	20.3	#NULL!	#NULL!	1.24	#NULL!	0.87	1.57	545.7	116.4	#NULL!	#NULL!	12.8	#NULL!	#NULL!	54	1	1	0	0	1	#NULL!
1212828	89	0	20.2	157	77	85	1	0	0		0	0	0	0	0	0	UA	1	3.16	97	130	2.32	73.5	#NULL!	#NULL!	11	#NULL!	#NULL!	16.8	#NULL!	39.4	0.38	4	1.32	1.33	546.8	76.2	#NULL!	#NULL!	10.1	#NULL!	5080.77	50	1	1	0	0	1	1
1204538	80	0	16.6	158	105	89	1	0	0		0	1	1	0	0	1	UA	1	7.31	129	147	5.12	70	#NULL!	#NULL!	11.4	#NULL!	#NULL!	51.8	#NULL!	31.9	0.8	2.68	1.1	1.97	547.2	116	#NULL!	#NULL!	17.9	#NULL!	15473	39	0	1	0	1	1	1
751956	78	0	19.8	178	82	69	1	0	1	0	0	0	1	0	0	0	UA	1	5.5	83	337	3.14	56.7	1.68	30.4	8.9	5.4	6.8	16.7	22.5	44.9	2.33	2.36	0.86	0.96	548.2	182.5	11.5	34	7.4	6.41	442.53	58	0	0	0	1	1	1
976687	78	1	#NULL!	144	72	62	1	0	0		1	0	1	0	0	0	UA	1	#NULL!	#NULL!	#NULL!	#NULL!	#NULL!	#NULL!	#NULL!	#NULL!	#NULL!	#NULL!	14.7	#NULL!	#NULL!	1.89	#NULL!	1	2.97	552.3	#NULL!	#NULL!	#NULL!	#NULL!	#NULL!	456	58	1	1	1	1	1	0
1318162	76	1	25.82	134	103	97	1	0	1	0	1	0	1	0	0	0	UA	1	6.58	140	219	3.36	51	2.77	42.1	10.9	4.9	6.1	40.2	29	34	1.12	3.86	1.06	2.38	555	102	16.8	#NULL!	#NULL!	#NULL!	2288.31	48	1	0	0	1	1	1
1228312	77	0	20.28	193	104	113	1	1	0		0	0	1	0	0	0	STEMI	1	9.97	108	106	8.46	84.8	#NULL!	#NULL!	10.3	7.1	#NULL!	25.9	#NULL!	28.4	#NULL!	#NULL!	#NULL!	#NULL!	555.5	125.4	#NULL!	#NULL!	38.1	#NULL!	15000	45	1	1	1	1	1	1
1226033	80	0	24.67	163	75	53	1	0	0		0	0	1	0	0	0	UA	1	6	101	298	4.32	72	#NULL!	#NULL!	10.6	#NULL!	#NULL!	14.8	#NULL!	37.6	3.57	3.17	0.74	0.74	556	112.7	#NULL!	#NULL!	19.6	#NULL!	770.02	67	0	1	1	1	1	1
1132767	75	1	25.71	122	65	66	1	0	0		0	1	1	0	0	0	UA	1	6.77	148	183	3.8	56.1	#NULL!	#NULL!	10	#NULL!	#NULL!	46.5	#NULL!	34.5	0.67	2.75	0.93	1.42	557.6	149.7	#NULL!	#NULL!	8.2	#NULL!	187	#NULL!	0	1	1	0	1	0
977122	77	1	#NULL!	120	60	80	0	0	0		1	1	1	0	0	1	UA	1	#NULL!	#NULL!	#NULL!	#NULL!	#NULL!	#NULL!	#NULL!	#NULL!	#NULL!	#NULL!	#NULL!	#NULL!	#NULL!	0.86	#NULL!	0.94	1.83	558.5	140.3	#NULL!	#NULL!	#NULL!	#NULL!	2558	56	1	1	1	1	1	1
859920	76	1	23.3	116	75	64	1	0	0		1	0	1	0	0	0	STEMI	1	5.34	113	264	3.24	60.7	#NULL!	#NULL!	10.4	#NULL!	#NULL!	15.5	#NULL!	39.6	2.83	5.24	1.09	3.27	559.7	132	#NULL!	#NULL!	7.2	#NULL!	#NULL!	27	1	1	1	0	1	1
1220679	78	1	30.2	91	70	108	0	1	0		1	1	0	0	0	0	STEMI	1	25.57	144	252	22.61	88.4	#NULL!	#NULL!	12.4	#NULL!	#NULL!	34.1	#NULL!	28.1	2.19	5.61	0.97	3.78	564.7	181.8	#NULL!	#NULL!	162.6	#NULL!	8756	#NULL!	1	1	1	0	1	1
827283	75	0	18	109	58	82	1	1	0		0	0	1	0	0	0	UA	0	9.9	96	235	7.22	73.3	#NULL!	#NULL!	7.8	6.8	#NULL!	20.3	#NULL!	37.7	1.76	4.96	0.95	3.02	566.1	147.3	#NULL!	#NULL!	#NULL!	#NULL!	4010	40	0	1	1	1	1	1
968613	78	1	#NULL!	123	74	75	1	0	0		0	0	1	0	0	1	STEMI	1	4.7	98	120	3.23	68.6	#NULL!	#NULL!	11.9	#NULL!	#NULL!	11.4	#NULL!	33.4	1.64	3.97	0.88	3.47	566.4	213	#NULL!	#NULL!	6.5	#NULL!	6022	60	0	0	0	0	1	1
1105909	75	0	#NULL!	127	77	96	1	1	0		0	0	0	0	0	1	STEMI	1	17.3	113	216	15.06	87	#NULL!	#NULL!	11.6	#NULL!	#NULL!	167.9	#NULL!	29.8	0.77	3.01	0.88	1.75	566.9	114	#NULL!	#NULL!	311.8	#NULL!	7846	#NULL!	1	1	0	0	1	1
1282555	82	1	18.94	115	62	82	0	0	0	0	0	0	1	0	0	0	UA	0	4.42	75	139	2.63	59.5	0.52	11.8	10	#NULL!	#NULL!	29.3	30.2	35.7	0.92	3.61	0.82	2.35	568	106.9	12.5	42.9	7.6	9.75	949.9	#NULL!	0	1	0	0	1	0
883470	77	1	20.399	129	67	68	1	0	0		1	0	1	0	0	0	UA	1	6.45	100	233	4.44	68.8	#NULL!	#NULL!	11.3	#NULL!	#NULL!	19.3	#NULL!	36.8	0.86	3.03	1.18	1.58	568	191.2	#NULL!	#NULL!	15.2	#NULL!	185	76	1	0	0	1	1	1
1303070	76	1	19.14	120	42	84	1	0	0	0	1	1	0	0	0	0	NSTEMI	0	5.45	112	179	3.11	57	1.65	30.3	13.5	#NULL!	#NULL!	17.3	20	34.2	0.58	2.75	1	1.4	569.3	103.9	12.8	28.7	#NULL!	#NULL!	6550	53	1	1	1	1	1	1
563222	76	1	25.59	130	63	78	1	0	0	1	0	1	1	0	0	0	UA	0	3.9	148	97	2.46	63.1	0.99	25.4	12.5	#NULL!	5.6	14.5	15.7	37.3	1.33	4.78	1.58	2.82	571.4	128.4	12.7	#NULL!	12	10.52	357.47	61	1	1	1	1	1	0
1368091	77	1	#NULL!	140	100	79	1	0	1	0	0	0	1	0	0	1	STEMI	1	14.87	137	123	12.58	84.6	0.91	6.1	12.6	#NULL!	5.9	180.8	397.3	33.6	0.12	3.13	1.13	1.83	572.7	319.6	14.2	37.4	177.5	6805	2904.74	52	1	1	1	1	1	1
1304354	78	1	32.4	138	68	92	1	0	0	0	1	0	0	0	0	0	UA	0	4.95	122	116	3.39	68.5	1.02	20.6	12.8	5.6	6.4	47.3	39.8	40.2	4.69	3.85	0.72	2.42	572.9	104.5	12.2	25.5	19.7	#NULL!	55.66	56	1	1	1	0	1	0
1171129	78	1	#NULL!	104	64	103	0	0	0		1	0	0	0	0	0	STEMI	1	2.77	74	176	1.62	73.3	#NULL!	#NULL!	11.1	#NULL!	#NULL!	38.2	#NULL!	28.5	1.13	2.9	0.21	0.54	573.2	140.7	#NULL!	#NULL!	6.4	#NULL!	34086	31	1	1	1	1	1	1
1216176	76	1	20.9	142	68	78	1	0	0		0	0	0	0	0	0	STEMI	0	6.55	107	169	4.99	76.1	#NULL!	#NULL!	12.9	#NULL!	#NULL!	58.5	#NULL!	31	1.42	6.22	1.31	4.4	578.7	19.3	#NULL!	#NULL!	15.7	#NULL!	2564.37	51	1	1	1	1	1	0
1234539	88	1	#NULL!	115	64	69	0	0	0		0	0	1	0	0	0	NSTEMI	0	8.96	111	387	7.47	83.4	#NULL!	#NULL!	9.7	#NULL!	#NULL!	22.5	#NULL!	34.3	#NULL!	#NULL!	#NULL!	#NULL!	582.1	201.8	#NULL!	#NULL!	15.1	#NULL!	22597	29	0	1	1	0	1	1
1304809	80	0	22.27	125	57	80	1	0	0	0	0	0	1	0	0	1	UA	1	3.98	130	93	2.88	72.4	0.75	18.8	#NULL!	4.39	#NULL!	17	34.5	35.8	1.22	2.69	0.78	1.5	590	137.9	46.5	61.5	15.2	#NULL!	3951.74	48	0	0	1	0	1	1
1095471	78	0	#NULL!	120	69	80	1	1	0		1	1	1	0	0	0	STEMI	0	5.88	77	161	4.71	80.01	#NULL!	#NULL!	14.4	4.3	#NULL!	15.4	#NULL!	29.8	1.81	4.23	0.94	2.77	592.9	370	#NULL!	#NULL!	10.6	#NULL!	35000	#NULL!	1	1	1	1	1	1
328172	83	1	#NULL!	156	74	70	1	1	0		0	0	1	0	0	0	UA	1	9.8	139	21	9.13	91.1	#NULL!	#NULL!	12.7	#NULL!	#NULL!	219	#NULL!	27.7	#NULL!	#NULL!	#NULL!	#NULL!	595.8	128.1	#NULL!	#NULL!	57.4	#NULL!	4799	62	0	1	1	0	1	1
1117195	81	1	#NULL!	117	70	87	0	0	0		1	0	1	0	0	0	STEMI	1	9.73	157	116	8.08	83	#NULL!	#NULL!	10.6	#NULL!	#NULL!	526.3	#NULL!	41.2	0.93	4.21	1.54	2.01	598.1	117.3	#NULL!	#NULL!	38.7	#NULL!	5591.98	24	1	1	0	1	1	1
911851	77	1	#NULL!	175	76	61	1	1	0		1	0	0	0	0	1	UA	1	7.5	92	264	5.69	75.4	#NULL!	#NULL!	7.8	6.6	#NULL!	29.3	#NULL!	38.1	2.08	3.1	0.79	1.56	599.1	126.1	#NULL!	#NULL!	#NULL!	#NULL!	2055	66	1	1	0	1	1	0
1043636	78	1	#NULL!	107	61	55	1	0	0		0	0	0	0	0	1	STEMI	0	10.94	95	134	9.78	89.4	#NULL!	#NULL!	15.8	#NULL!	#NULL!	173.7	#NULL!	32.1	0.65	2.83	0.95	1.43	605.6	391.1	#NULL!	#NULL!	24.6	#NULL!	35000	64	1	1	0	1	1	1
1218820	79	1	23.4	117	71	109	1	0	0		0	0	0	0	0	0	STEMI	1	20.47	107	232	18.4	89.9	#NULL!	#NULL!	10.7	#NULL!	#NULL!	177.8	#NULL!	26.4	#NULL!	#NULL!	#NULL!	#NULL!	606.3	251	#NULL!	#NULL!	25.6	#NULL!	7390	54	1	1	0	1	1	1
1272839	78	0	#NULL!	153	78	99	1	0	0		0	0	0	0	0	0	NSTEMI	1	9.94	103	268	7.61	76.6	#NULL!	#NULL!	10.1	#NULL!	#NULL!	35.3	#NULL!	34.5	1.44	4.58	1.33	2.84	606.6	99.4	#NULL!	#NULL!	24.7	#NULL!	507.88	58	1	1	0	1	1	0
1306955	76	1	28.6	125	74	98	1	1	0	0	0	1	1	0	0	0	NSTEMI	0	11.52	137	229	2.7	69.5	2.7	23.4	10.2	6.14	#NULL!	13.3	11.9	33.5	1.58	2.93	0.85	1.45	619.8	138.5	13.7	39	#NULL!	#NULL!	472.93	50	1	0	1	0	1	1
635064	90	0	15.98	106	60	76	1	0	0	0	#NULL!	#NULL!	#NULL!	#NULL!	#NULL!	0	UA	1	12.3	79	215	4.57	65	1.65	23.5	10.9	4.82	6.4	5.3	13.6	31.2	0.8	5.81	1.49	3.71	625.5	88.6	14.2	46.6	10.3	12.31	6518	55	1	1	0	1	1	1
1364302	76	0	#NULL!	152	62	69	1	0	1	0	0	0	1	0	0	0	NSTEMI	1	10.26	90	291	9.09	88.6	0.43	4.2	10.9	6.5	#NULL!	57.9	79	31.5	1.01	3.24	1.03	1.55	625.7	239.9	14.2	36.5	54.6	2767	#NULL!	28	1	1	1	0	1	1
1209047	82	0	21.3	140	74	74	1	0	0		0	0	1	0	0	0	UA	1	6.08	130	235	4.29	70.5	#NULL!	#NULL!	10.3	#NULL!	#NULL!	20.1	#NULL!	43.4	1.93	6.8	1.63	4.24	627.2	119.8	#NULL!	#NULL!	11.4	#NULL!	1375	48	1	0	0	1	1	0
1365703	76	0	28.5	158	88	60	1	0	0	0	#NULL!	0	1	0	0	0	NSTEMI	0	12.08	143	302	8.79	72.8	2.4	2.4	10.6	4.14	#NULL!	11.2	2.03	36.8	1.83	2.96	0.77	1.55	629.3	102.2	15.2	56.7	20.5	3.77	1467.61	35	1	1	1	1	1	1
896539	82	1	#NULL!	132	67	89	1	0	0		0	0	1	0	0	0	UA	1	8.2	114	116	6.66	81.2	#NULL!	#NULL!	8.6	5.7	#NULL!	13.2	#NULL!	30.1	1.71	3.68	0.49	1.66	630.5	155.2	#NULL!	#NULL!	15	#NULL!	10443	#NULL!	1	1	1	1	1	1
1221500	82	1	18.59	107	64	74	0	0	0		1	0	0	0	0	0	STEMI	0	5.87	109	145	3.2	54.5	#NULL!	#NULL!	10.1	#NULL!	#NULL!	30.1	#NULL!	33.4	1.26	3.54	1.04	2.11	630.6	166.8	#NULL!	#NULL!	13.9	#NULL!	1083	53	1	1	0	1	1	0
1077886	76	1	28.65	117	71	71	1	1	0		1	0	1	0	0	0	UA	1	7.8	108	106	5.52	70.7	#NULL!	#NULL!	10	5.6	#NULL!	27.6	#NULL!	35.2	1.72	3.59	0.94	2.05	636.6	126.6	#NULL!	#NULL!	13.4	#NULL!	1447.92	52	1	1	1	1	1	1
1180180	75	0	15.58	90	70	64	0	1	0		0	0	0	0	0	0	UA	1	10.26	108	111	8.64	84.2	#NULL!	#NULL!	11.8	#NULL!	#NULL!	#NULL!	#NULL!	#NULL!	#NULL!	#NULL!	#NULL!	#NULL!	638.6	89.1	#NULL!	#NULL!	72.4	#NULL!	35000	#NULL!	0	0	0	0	1	1
1133356	79	1	23.5	121	74	72	1	0	0		1	0	1	0	0	0	UA	1	10.18	132	173	9.53	93.6	#NULL!	#NULL!	12.3	#NULL!	#NULL!	21.2	#NULL!	38	1.23	5.14	1.22	3.39	645.3	259.5	#NULL!	#NULL!	19.7	#NULL!	893	46	1	1	0	1	0	1
1326806	80	1	27.73	110	70	62	1	0	0	1	1	1	1	0	1	1	NSTEMI	0	5.63	113	105	4.5	80	0.62	11	11.5	#NULL!	#NULL!	#NULL!	#NULL!	#NULL!	0.68	2.26	0.8	1.08	647.5	221.8	#NULL!	#NULL!	17.6	20.52	10946.5	33	1	1	0	1	1	1
1335387	90	1	17.1	118	66	100	1	0	1	1	1	0	1	0	0	1	UA	1	5.73	129	88	4.18	73	1.12	19.5	12	#NULL!	#NULL!	8.7	17.9	40.2	1.29	3.42	0.89	2.05	652.7	91.3	14.1	1.07	14.8	58.15	7454.78	33	0	1	0	1	1	1
1268157	82	0	20.6	122	62	72	0	0	0		0	0	1	1	0	0	UA	1	3.95	112	171	2.21	56	#NULL!	#NULL!	10.2	#NULL!	#NULL!	2.6	#NULL!	42.5	5.25	4.36	0.65	2.94	667.5	100	#NULL!	#NULL!	10.7	#NULL!	16396	#NULL!	1	1	0	0	1	1
1045702	83	0	#NULL!	123	66	105	0	0	0		0	1	1	0	0	0	NSTEMI	1	10.9	100	147	9.59	87.9	#NULL!	#NULL!	13.4	5.4	#NULL!	836.8	#NULL!	33.5	1.29	3.83	0.96	2.28	678.3	145.4	#NULL!	#NULL!	15	#NULL!	35000	#NULL!	1	0	0	0	1	1
1201274	77	1	27.47	128	100	118	1	1	0		1	0	0	0	0	1	NSTEMI	1	6.24	114	154	4.05	65	#NULL!	#NULL!	10.8	9.7	#NULL!	32.6	#NULL!	33	#NULL!	3.41	#NULL!	#NULL!	680	144.6	#NULL!	#NULL!	13	#NULL!	8073	28	0	1	1	1	1	1
1166706	77	1	#NULL!	143	53	70	1	0	0		0	0	0	0	0	0	STEMI	1	5.52	92	92	4.57	82.8	#NULL!	#NULL!	10.7	#NULL!	#NULL!	7.3	#NULL!	27.1	1.74	2.79	0.71	1.47	696.6	435.1	#NULL!	#NULL!	12.4	#NULL!	14288	50	0	0	0	0	1	1
902995	76	0	19.15	145	87	59	1	1	1	0	0	0	1	0	0	0	NSTEMI	1	8.78	103	259	7.16	81.6	1.09	12.4	11.6	6.9	6.7	29.6	19.3	37.9	2.54	6.34	1.05	4.83	696.7	128.5	14.6	37.3	18.4	144.9	#NULL!	32	1	1	0	1	1	1
1288443	75	1	26.04	139	94	91	1	0	1	0	1	0	0	0	0	0	STEMI	1	7.06	105	202	5.74	81.2	0.71	10.1	9.5	#NULL!	5.8	21.8	22.6	31.3	0.82	2.19	0.69	1.25	704	234.5	14.1	#NULL!	20.3	7547	#NULL!	21	1	1	1	1	1	1
1240021	80	1	14.71	119	76	75	0	0	0		0	0	1	0	0	1	UA	1	3.31	93	71	2.45	74.1	#NULL!	#NULL!	12.4	#NULL!	#NULL!	8.5	#NULL!	32.2	0.96	3.66	1.39	1.99	706.7	252.2	#NULL!	#NULL!	8.6	#NULL!	2486.5	59	0	#NULL!	0	1	1	0
1188398	86	1	#NULL!	152	71	100	1	1	0		0	1	1	0	0	0	STEMI	1	5.04	80	136	4.39	87.1	#NULL!	#NULL!	13.3	#NULL!	#NULL!	13.5	#NULL!	37.1	#NULL!	#NULL!	#NULL!	#NULL!	715.4	180.7	#NULL!	#NULL!	18.9	#NULL!	15000	#NULL!	0	0	0	0	1	1
1330800	83	0	#NULL!	116	67	139	1	1	1	0	0	0	0	0	0	0	NSTEMI	1	5.95	93	154	4.42	74.3	0.84	14.1	13.2	#NULL!	6.5	47.7	75.8	32	1.82	2.83	0.69	1.54	718.2	186.3	20	37.1	48	2529	#NULL!	40	1	1	0	1	1	1
359666	78	1	23.03	118	71	90	1	0	1	1	#NULL!	#NULL!	1	0	0	0	STEMI	1	11.05	77	247	8.86	80.2	1.2	10.9	10.5	#NULL!	5.7	12.5	29.9	25.1	1.62	3.74	0.76	2.28	738.7	148.6	16.6	47.6	21.1	541.7	4835	59	0	1	1	0	1	1
1202266	84	1	22	141	95	138	1	1	0		0	0	0	0	0	1	UA	1	18.2	124	161	16.59	91.1	#NULL!	#NULL!	11.3	7.4	#NULL!	655	#NULL!	31.5	1.85	5.04	0.7	3.84	746.8	127.1	#NULL!	#NULL!	20.6	#NULL!	15000	#NULL!	1	1	1	1	1	0
902995	76	0	19.15	145	87	59	1	1	1	0	0	0	1	0	0	0	STEMI	1	7.1	107	280	5.87	82.8	0.96	13.5	10.7	5.9	6.7	29.6	19.3	37.9	2.54	6.34	1.05	4.83	763	163.8	12.6	#NULL!	18.4	#NULL!	#NULL!	32	1	1	1	1	1	1
181945	82	1	#NULL!	172	95	73	1	0	0		0	0	1	0	0	0	UA	1	7.6	119	180	5.93	77.9	#NULL!	#NULL!	10.4	#NULL!	#NULL!	13.7	#NULL!	34.5	1.01	3.14	0.88	1.67	891.3	983.9	#NULL!	#NULL!	8.1	#NULL!	2132	#NULL!	0	0	0	0	1	1
1252177	78	0	#NULL!	110	58	76	1	1	0		0	0	0	0	0	0	UA	1	8.79	114	196	7.08	80.6	#NULL!	#NULL!	11	6.4	#NULL!	9.5	#NULL!	36	2	2.6	0.82	2.19	942.1	114.3	#NULL!	#NULL!	#NULL!	#NULL!	104.41	55	1	1	1	0	1	0
[truncated: 13 more columns]
